# Supplementary material for: Assessing network-based methods in the context of system toxicology
Source: Front Pharmacol. 2023 Jul 12;14:1225697. doi: 10.3389/fphar.2023.1225697 (PMC10369070; doi:10.3389/fphar.2023.1225697)
Supplement: Supplementary file 1 [file Table2.XLSX]

## Sheet: File description
This file include the clusters with more than 3 GO terms.
There are 5 spreadsheet, one for each Network approach, and for the 33 genes from the Liver Steatosis AOPs (33_Steatosis_AOP_genes TopGO-Revigo Annotation).
	Structure of spreadsheet
	Cluster_name	Cluster name obtained from REVIGO. The string of numbers is the GO ID representative of the cluster. (ex: GO:0010332 → 0010332).
	Freq	Number of GO terms included in this cluster
	GO_group	The gene ontology terms are grouped in the Biological Process (BP).
	TermID	Gene Ontology ID.
	Name	Gene Ontology name.
	group	Groups obtained from MONET (574, 1194, 1237,1315,1316, 1330) (column just available for MONET TopGO-Revigo annotation speardsheet).

## Sheet: GUILD TopGO-Revigo annotation g
Cluster_name	Freq	GO_group	TermID	Name
45821	18	BP	GO:0045821	positive regulation of glycolytic process
46889	18	BP	GO:0046889	positive regulation of lipid biosynthetic process
70374	18	BP	GO:0070374	positive regulation of ERK1 and ERK2 cascade
2001237	17	BP	GO:2001237	negative regulation of extrinsic apoptotic signaling pathway
43301	17	BP	GO:0043301	negative regulation of leukocyte degranulation
43525	15	BP	GO:0043525	positive regulation of neuron apoptotic process
43536	15	BP	GO:0043536	positive regulation of blood vessel endothelial cell migration
10875	12	BP	GO:0010875	positive regulation of cholesterol efflux
6919	12	BP	GO:0006919	activation of cysteine-type endopeptidase activity involved in apoptotic process
71260	12	BP	GO:0071260	cellular response to mechanical stimulus
10507	11	BP	GO:0010507	negative regulation of autophagy
10803	10	BP	GO:0010803	regulation of tumor necrosis factor-mediated signaling pathway
30183	10	BP	GO:0030183	B cell differentiation
31397	10	BP	GO:0031397	negative regulation of protein ubiquitination
2821	9	BP	GO:0002821	positive regulation of adaptive immune response
45648	9	BP	GO:0045648	positive regulation of erythrocyte differentiation
51924	9	BP	GO:0051924	regulation of calcium ion transport
55006	9	BP	GO:0055006	cardiac cell development
71222	9	BP	GO:0071222	cellular response to lipopolysaccharide
1953	8	BP	GO:0001953	negative regulation of cell-matrix adhesion
30890	8	BP	GO:0030890	positive regulation of B cell proliferation
32024	8	BP	GO:0032024	positive regulation of insulin secretion
35066	8	BP	GO:0035066	positive regulation of histone acetylation
42307	8	BP	GO:0042307	positive regulation of protein import into nucleus
50729	8	BP	GO:0050729	positive regulation of inflammatory response
60068	8	BP	GO:0060068	vagina development
1525	7	BP	GO:0001525	angiogenesis
1904646	7	BP	GO:1904646	cellular response to amyloid-beta
1974	7	BP	GO:0001974	blood vessel remodeling
30593	7	BP	GO:0030593	neutrophil chemotaxis
42311	7	BP	GO:0042311	vasodilation
43029	7	BP	GO:0043029	T cell homeostasis
45931	7	BP	GO:0045931	positive regulation of mitotic cell cycle
48714	7	BP	GO:0048714	positive regulation of oligodendrocyte differentiation
51054	7	BP	GO:0051054	positive regulation of DNA metabolic process
60907	7	BP	GO:0060907	positive regulation of macrophage cytokine production
61518	7	BP	GO:0061518	microglial cell proliferation
10611	6	BP	GO:0010611	regulation of cardiac muscle hypertrophy
1938	6	BP	GO:0001938	positive regulation of endothelial cell proliferation
2000352	6	BP	GO:2000352	negative regulation of endothelial cell apoptotic process
2000379	6	BP	GO:2000379	positive regulation of reactive oxygen species metabolic process
2903	6	BP	GO:0002903	negative regulation of B cell apoptotic process
32722	6	BP	GO:0032722	positive regulation of chemokine production
36499	6	BP	GO:0036499	PERK-mediated unfolded protein response
46697	6	BP	GO:0046697	decidualization
48679	6	BP	GO:0048679	regulation of axon regeneration
51000	6	BP	GO:0051000	positive regulation of nitric-oxide synthase activity
60440	6	BP	GO:0060440	trachea formation
6635	6	BP	GO:0006635	fatty acid beta-oxidation
7179	6	BP	GO:0007179	transforming growth factor beta receptor signaling pathway
9749	6	BP	GO:0009749	response to glucose
1889	5	BP	GO:0001889	liver development
1900369	5	BP	GO:1900369	negative regulation of post-transcriptional gene silencing by RNA
19722	5	BP	GO:0019722	calcium-mediated signaling
1990440	5	BP	GO:1990440	positive regulation of transcription from RNA polymerase II promoter in response to endoplasmic reticulum stress
30308	5	BP	GO:0030308	negative regulation of cell growth
30512	5	BP	GO:0030512	negative regulation of transforming growth factor beta receptor signaling pathway
3151	5	BP	GO:0003151	outflow tract morphogenesis
32570	5	BP	GO:0032570	response to progesterone
34136	5	BP	GO:0034136	negative regulation of toll-like receptor 2 signaling pathway
34372	5	BP	GO:0034372	very-low-density lipoprotein particle remodeling
42542	5	BP	GO:0042542	response to hydrogen peroxide
43388	5	BP	GO:0043388	positive regulation of DNA binding
50731	5	BP	GO:0050731	positive regulation of peptidyl-tyrosine phosphorylation
55001	5	BP	GO:0055001	muscle cell development
10332	4	BP	GO:0010332	response to gamma radiation
10666	4	BP	GO:0010666	positive regulation of cardiac muscle cell apoptotic process
10746	4	BP	GO:0010746	regulation of long-chain fatty acid import across plasma membrane
1902895	4	BP	GO:1902895	positive regulation of miRNA transcription
22011	4	BP	GO:0022011	myelination in peripheral nervous system
2579	4	BP	GO:0002579	positive regulation of antigen processing and presentation
2755	4	BP	GO:0002755	MyD88-dependent toll-like receptor signaling pathway
32057	4	BP	GO:0032057	negative regulation of translational initiation in response to stress
32091	4	BP	GO:0032091	negative regulation of protein binding
32728	4	BP	GO:0032728	positive regulation of interferon-beta production
33034	4	BP	GO:0033034	positive regulation of myeloid cell apoptotic process
34104	4	BP	GO:0034104	negative regulation of tissue remodeling
42060	4	BP	GO:0042060	wound healing
43032	4	BP	GO:0043032	positive regulation of macrophage activation
44000	4	BP	GO:0044000	movement in host
45	4	BP	GO:0000045	autophagosome assembly
45471	4	BP	GO:0045471	response to ethanol
45597	4	BP	GO:0045597	positive regulation of cell differentiation
45766	4	BP	GO:0045766	positive regulation of angiogenesis
46326	4	BP	GO:0046326	positive regulation of glucose import
46427	4	BP	GO:0046427	positive regulation of receptor signaling pathway via JAK-STAT
46598	4	BP	GO:0046598	positive regulation of viral entry into host cell
48538	4	BP	GO:0048538	thymus development
51092	4	BP	GO:0051092	positive regulation of NF-kappaB transcription factor activity
55074	4	BP	GO:0055074	calcium ion homeostasis
55089	4	BP	GO:0055089	fatty acid homeostasis
60742	4	BP	GO:0060742	epithelial cell differentiation involved in prostate gland development
70059	4	BP	GO:0070059	intrinsic apoptotic signaling pathway in response to endoplasmic reticulum stress
70371	4	BP	GO:0070371	ERK1 and ERK2 cascade
70932	4	BP	GO:0070932	histone H3 deacetylation
7173	4	BP	GO:0007173	epidermal growth factor receptor signaling pathway
90118	4	BP	GO:0090118	receptor-mediated endocytosis involved in cholesterol transport
9205	4	BP	GO:0009205	purine ribonucleoside triphosphate metabolic process
10517	3	BP	GO:0010517	regulation of phospholipase activity
10832	3	BP	GO:0010832	negative regulation of myotube differentiation
122	3	BP	GO:0000122	negative regulation of transcription by RNA polymerase II
14911	3	BP	GO:0014911	positive regulation of smooth muscle cell migration
1649	3	BP	GO:0001649	osteoblast differentiation
17148	3	BP	GO:0017148	negative regulation of translation
1844	3	BP	GO:0001844	protein insertion into mitochondrial membrane involved in apoptotic signaling pathway
1903055	3	BP	GO:1903055	positive regulation of extracellular matrix organization
1903140	3	BP	GO:1903140	regulation of establishment of endothelial barrier
1990090	3	BP	GO:1990090	cellular response to nerve growth factor stimulus
2000737	3	BP	GO:2000737	negative regulation of stem cell differentiation
2052	3	BP	GO:0002052	positive regulation of neuroblast proliferation
2230	3	BP	GO:0002230	positive regulation of defense response to virus by host
2281	3	BP	GO:0002281	macrophage activation involved in immune response
30225	3	BP	GO:0030225	macrophage differentiation
31069	3	BP	GO:0031069	hair follicle morphogenesis
31103	3	BP	GO:0031103	axon regeneration
31507	3	BP	GO:0031507	heterochromatin formation
31622	3	BP	GO:0031622	positive regulation of fever generation
32731	3	BP	GO:0032731	positive regulation of interleukin-1 beta production
32922	3	BP	GO:0032922	circadian regulation of gene expression
34123	3	BP	GO:0034123	positive regulation of toll-like receptor signaling pathway
45599	3	BP	GO:0045599	negative regulation of fat cell differentiation
45944	3	BP	GO:0045944	positive regulation of transcription by RNA polymerase II
46627	3	BP	GO:0046627	negative regulation of insulin receptor signaling pathway
48661	3	BP	GO:0048661	positive regulation of smooth muscle cell proliferation
48873	3	BP	GO:0048873	homeostasis of number of cells within a tissue
50766	3	BP	GO:0050766	positive regulation of phagocytosis
50847	3	BP	GO:0050847	progesterone receptor signaling pathway
51048	3	BP	GO:0051048	negative regulation of secretion
51348	3	BP	GO:0051348	negative regulation of transferase activity
51592	3	BP	GO:0051592	response to calcium ion
60268	3	BP	GO:0060268	negative regulation of respiratory burst
60612	3	BP	GO:0060612	adipose tissue development
60749	3	BP	GO:0060749	mammary gland alveolus development
60982	3	BP	GO:0060982	coronary artery morphogenesis
61900	3	BP	GO:0061900	glial cell activation
62100	3	BP	GO:0062100	positive regulation of programmed necrotic cell death
70168	3	BP	GO:0070168	negative regulation of biomineral tissue development
71230	3	BP	GO:0071230	cellular response to amino acid stimulus
71356	3	BP	GO:0071356	cellular response to tumor necrosis factor
72203	3	BP	GO:0072203	cell proliferation involved in metanephros development
7253	3	BP	GO:0007253	cytoplasmic sequestering of NF-kappaB
7420	3	BP	GO:0007420	brain development
8203	3	BP	GO:0008203	cholesterol metabolic process
90090	3	BP	GO:0090090	negative regulation of canonical Wnt signaling pathway
9409	3	BP	GO:0009409	response to cold
97192	3	BP	GO:0097192	extrinsic apoptotic signaling pathway in absence of ligand

## Sheet: MONET TopGO-Revigo annotation g
Cluster_name	Freq	GO_group	TermID	Name	group
51123	6	BP	GO:0051123	RNA polymerase II preinitiation complex assembly	1330
6282	4	BP	GO:0006282	regulation of DNA repair	1330
2000045	3	BP	GO:2000045	regulation of G1/S transition of mitotic cell cycle	1330
34983	3	BP	GO:0034983	peptidyl-lysine deacetylation	1330
43984	3	BP	GO:0043984	histone H4-K16 acetylation	1330
51153	3	BP	GO:0051153	regulation of striated muscle cell differentiation	1330
71440	3	BP	GO:0071440	regulation of histone H3-K14 acetylation	1330
71901	3	BP	GO:0071901	negative regulation of protein serine/threonine kinase activity	1330
90043	3	BP	GO:0090043	regulation of tubulin deacetylation	1330
97267	6	BP	GO:0097267	omega-hydroxylase P450 pathway	1316
2674	3	BP	GO:0002674	negative regulation of acute inflammatory response	1316
44597	3	BP	GO:0044597	daunorubicin metabolic process	1316
46887	3	BP	GO:0046887	positive regulation of hormone secretion	1316
7596	3	BP	GO:0007596	blood coagulation	1316
10896	3	BP	GO:0010896	regulation of triglyceride catabolic process	1315
6958	3	BP	GO:0006958	complement activation, classical pathway	1315
34142	4	BP	GO:0034142	toll-like receptor 4 signaling pathway	1237
16242	3	BP	GO:0016242	negative regulation of macroautophagy	1237
1900745	3	BP	GO:1900745	positive regulation of p38MAPK cascade	1237
46929	3	BP	GO:0046929	negative regulation of neurotransmitter secretion	1237
46321	3	BP	GO:0046321	positive regulation of fatty acid oxidation	1194
32543	6	BP	GO:0032543	mitochondrial translation	574
43039	5	BP	GO:0043039	tRNA aminoacylation	574

## Sheet: IPATH TopGO-Revigo annotation g
Cluster_name	Freq	GO_group	TermID	Name
19228	7	BP	GO:0019228	neuronal action potential
45821	7	BP	GO:0045821	positive regulation of glycolytic process
86091	7	BP	GO:0086091	regulation of heart rate by cardiac conduction
45922	6	BP	GO:0045922	negative regulation of fatty acid metabolic process
34765	5	BP	GO:0034765	regulation of ion transmembrane transport
14894	4	BP	GO:0014894	response to denervation involved in regulation of muscle adaptation
16098	4	BP	GO:0016098	monoterpenoid metabolic process
1900369	4	BP	GO:1900369	negative regulation of post-transcriptional gene silencing by RNA
1902894	4	BP	GO:1902894	negative regulation of miRNA transcription
1904646	4	BP	GO:1904646	cellular response to amyloid-beta
2000273	4	BP	GO:2000273	positive regulation of signaling receptor activity
51222	4	BP	GO:0051222	positive regulation of protein transport
52696	4	BP	GO:0052696	flavonoid glucuronidation
70933	4	BP	GO:0070933	histone H4 deacetylation
9205	4	BP	GO:0009205	purine ribonucleoside triphosphate metabolic process
150104	3	BP	GO:0150104	transport across blood-brain barrier
1558	3	BP	GO:0001558	regulation of cell growth
19373	3	BP	GO:0019373	epoxygenase P450 pathway
30512	3	BP	GO:0030512	negative regulation of transforming growth factor beta receptor signaling pathway
32091	3	BP	GO:0032091	negative regulation of protein binding
34614	3	BP	GO:0034614	cellular response to reactive oxygen species
43536	3	BP	GO:0043536	positive regulation of blood vessel endothelial cell migration
46889	3	BP	GO:0046889	positive regulation of lipid biosynthetic process
51973	3	BP	GO:0051973	positive regulation of telomerase activity
71380	3	BP	GO:0071380	cellular response to prostaglandin E stimulus
71480	3	BP	GO:0071480	cellular response to gamma radiation
71901	3	BP	GO:0071901	negative regulation of protein serine/threonine kinase activity
72329	3	BP	GO:0072329	monocarboxylic acid catabolic process
8210	3	BP	GO:0008210	estrogen metabolic process

## Sheet: MSI TopGO-Revigo annotation gen
Cluster_name	Freq	GO_group	TermID	Name
32436	25	BP	GO:0032436	positive regulation of proteasomal ubiquitin-dependent protein catabolic process
32000	21	BP	GO:0032000	positive regulation of fatty acid beta-oxidation
45582	20	BP	GO:0045582	positive regulation of T cell differentiation
51571	20	BP	GO:0051571	positive regulation of histone H3-K4 methylation
45821	15	BP	GO:0045821	positive regulation of glycolytic process
70374	14	BP	GO:0070374	positive regulation of ERK1 and ERK2 cascade
2001237	13	BP	GO:2001237	negative regulation of extrinsic apoptotic signaling pathway
32092	13	BP	GO:0032092	positive regulation of protein binding
42572	13	BP	GO:0042572	retinol metabolic process
6635	13	BP	GO:0006635	fatty acid beta-oxidation
45736	12	BP	GO:0045736	negative regulation of cyclin-dependent protein serine/threonine kinase activity
2000573	11	BP	GO:2000573	positive regulation of DNA biosynthetic process
32024	11	BP	GO:0032024	positive regulation of insulin secretion
32869	11	BP	GO:0032869	cellular response to insulin stimulus
71456	11	BP	GO:0071456	cellular response to hypoxia
1974	10	BP	GO:0001974	blood vessel remodeling
2690	10	BP	GO:0002690	positive regulation of leukocyte chemotaxis
70059	10	BP	GO:0070059	intrinsic apoptotic signaling pathway in response to endoplasmic reticulum stress
71385	10	BP	GO:0071385	cellular response to glucocorticoid stimulus
1701	9	BP	GO:0001701	in utero embryonic development
1902177	9	BP	GO:1902177	positive regulation of oxidative stress-induced intrinsic apoptotic signaling pathway
34620	9	BP	GO:0034620	cellular response to unfolded protein
34644	9	BP	GO:0034644	cellular response to UV
70301	9	BP	GO:0070301	cellular response to hydrogen peroxide
10875	8	BP	GO:0010875	positive regulation of cholesterol efflux
2000109	8	BP	GO:2000109	regulation of macrophage apoptotic process
2719	8	BP	GO:0002719	negative regulation of cytokine production involved in immune response
43536	8	BP	GO:0043536	positive regulation of blood vessel endothelial cell migration
51354	8	BP	GO:0051354	negative regulation of oxidoreductase activity
6346	8	BP	GO:0006346	DNA methylation-dependent heterochromatin formation
9267	8	BP	GO:0009267	cellular response to starvation
10803	7	BP	GO:0010803	regulation of tumor necrosis factor-mediated signaling pathway
1525	7	BP	GO:0001525	angiogenesis
1658	7	BP	GO:0001658	branching involved in ureteric bud morphogenesis
1900087	7	BP	GO:1900087	positive regulation of G1/S transition of mitotic cell cycle
1938	7	BP	GO:0001938	positive regulation of endothelial cell proliferation
2000819	7	BP	GO:2000819	regulation of nucleotide-excision repair
30324	7	BP	GO:0030324	lung development
30890	7	BP	GO:0030890	positive regulation of B cell proliferation
31397	7	BP	GO:0031397	negative regulation of protein ubiquitination
44000	7	BP	GO:0044000	movement in host
45597	7	BP	GO:0045597	positive regulation of cell differentiation
48525	7	BP	GO:0048525	negative regulation of viral process
50731	7	BP	GO:0050731	positive regulation of peptidyl-tyrosine phosphorylation
60412	7	BP	GO:0060412	ventricular septum morphogenesis
62013	7	BP	GO:0062013	positive regulation of small molecule metabolic process
7004	7	BP	GO:0007004	telomere maintenance via telomerase
10832	6	BP	GO:0010832	negative regulation of myotube differentiation
1541	6	BP	GO:0001541	ovarian follicle development
1711	6	BP	GO:0001711	endodermal cell fate commitment
1756	6	BP	GO:0001756	somitogenesis
1837	6	BP	GO:0001837	epithelial to mesenchymal transition
1900369	6	BP	GO:1900369	negative regulation of post-transcriptional gene silencing by RNA
1905332	6	BP	GO:1905332	positive regulation of morphogenesis of an epithelium
2000379	6	BP	GO:2000379	positive regulation of reactive oxygen species metabolic process
30183	6	BP	GO:0030183	B cell differentiation
30308	6	BP	GO:0030308	negative regulation of cell growth
3181	6	BP	GO:0003181	atrioventricular valve morphogenesis
32411	6	BP	GO:0032411	positive regulation of transporter activity
33598	6	BP	GO:0033598	mammary gland epithelial cell proliferation
34392	6	BP	GO:0034392	negative regulation of smooth muscle cell apoptotic process
43065	6	BP	GO:0043065	positive regulation of apoptotic process
45648	6	BP	GO:0045648	positive regulation of erythrocyte differentiation
45727	6	BP	GO:0045727	positive regulation of translation
51092	6	BP	GO:0051092	positive regulation of NF-kappaB transcription factor activity
60923	6	BP	GO:0060923	cardiac muscle cell fate commitment
71222	6	BP	GO:0071222	cellular response to lipopolysaccharide
7179	6	BP	GO:0007179	transforming growth factor beta receptor signaling pathway
9205	6	BP	GO:0009205	purine ribonucleoside triphosphate metabolic process
16575	5	BP	GO:0016575	histone deacetylation
1782	5	BP	GO:0001782	B cell homeostasis
1889	5	BP	GO:0001889	liver development
2000352	5	BP	GO:2000352	negative regulation of endothelial cell apoptotic process
2092	5	BP	GO:0002092	positive regulation of receptor internalization
2755	5	BP	GO:0002755	MyD88-dependent toll-like receptor signaling pathway
30279	5	BP	GO:0030279	negative regulation of ossification
30512	5	BP	GO:0030512	negative regulation of transforming growth factor beta receptor signaling pathway
30857	5	BP	GO:0030857	negative regulation of epithelial cell differentiation
32510	5	BP	GO:0032510	endosome to lysosome transport via multivesicular body sorting pathway
32722	5	BP	GO:0032722	positive regulation of chemokine production
43518	5	BP	GO:0043518	negative regulation of DNA damage response, signal transduction by p53 class mediator
50729	5	BP	GO:0050729	positive regulation of inflammatory response
60766	5	BP	GO:0060766	negative regulation of androgen receptor signaling pathway
6281	5	BP	GO:0006281	DNA repair
90303	5	BP	GO:0090303	positive regulation of wound healing
9749	5	BP	GO:0009749	response to glucose
100012	4	BP	GO:0100012	regulation of heart induction by canonical Wnt signaling pathway
10518	4	BP	GO:0010518	positive regulation of phospholipase activity
1900182	4	BP	GO:1900182	positive regulation of protein localization to nucleus
2000630	4	BP	GO:2000630	positive regulation of miRNA metabolic process
2067	4	BP	GO:0002067	glandular epithelial cell differentiation
2088	4	BP	GO:0002088	lens development in camera-type eye
2286	4	BP	GO:0002286	T cell activation involved in immune response
2821	4	BP	GO:0002821	positive regulation of adaptive immune response
30325	4	BP	GO:0030325	adrenal gland development
32780	4	BP	GO:0032780	negative regulation of ATP-dependent activity
33189	4	BP	GO:0033189	response to vitamin A
3331	4	BP	GO:0003331	positive regulation of extracellular matrix constituent secretion
34121	4	BP	GO:0034121	regulation of toll-like receptor signaling pathway
34374	4	BP	GO:0034374	low-density lipoprotein particle remodeling
34605	4	BP	GO:0034605	cellular response to heat
40018	4	BP	GO:0040018	positive regulation of multicellular organism growth
42593	4	BP	GO:0042593	glucose homeostasis
42733	4	BP	GO:0042733	embryonic digit morphogenesis
42744	4	BP	GO:0042744	hydrogen peroxide catabolic process
43922	4	BP	GO:0043922	negative regulation by host of viral transcription
45471	4	BP	GO:0045471	response to ethanol
46825	4	BP	GO:0046825	regulation of protein export from nucleus
48538	4	BP	GO:0048538	thymus development
48546	4	BP	GO:0048546	digestive tract morphogenesis
48661	4	BP	GO:0048661	positive regulation of smooth muscle cell proliferation
48709	4	BP	GO:0048709	oligodendrocyte differentiation
51281	4	BP	GO:0051281	positive regulation of release of sequestered calcium ion into cytosol
51403	4	BP	GO:0051403	stress-activated MAPK cascade
55089	4	BP	GO:0055089	fatty acid homeostasis
60252	4	BP	GO:0060252	positive regulation of glial cell proliferation
60742	4	BP	GO:0060742	epithelial cell differentiation involved in prostate gland development
6094	4	BP	GO:0006094	gluconeogenesis
61644	4	BP	GO:0061644	protein localization to CENP-A containing chromatin
6337	4	BP	GO:0006337	nucleosome disassembly
6545	4	BP	GO:0006545	glycine biosynthetic process
6606	4	BP	GO:0006606	protein import into nucleus
90090	4	BP	GO:0090090	negative regulation of canonical Wnt signaling pathway
98	4	BP	GO:0000098	sulfur amino acid catabolic process
10718	3	BP	GO:0010718	positive regulation of epithelial to mesenchymal transition
10746	3	BP	GO:0010746	regulation of long-chain fatty acid import across plasma membrane
14911	3	BP	GO:0014911	positive regulation of smooth muscle cell migration
16202	3	BP	GO:0016202	regulation of striated muscle tissue development
1901533	3	BP	GO:1901533	negative regulation of hematopoietic progenitor cell differentiation
1903243	3	BP	GO:1903243	negative regulation of cardiac muscle hypertrophy in response to stress
1903829	3	BP	GO:1903829	positive regulation of protein localization
2070	3	BP	GO:0002070	epithelial cell maturation
30225	3	BP	GO:0030225	macrophage differentiation
31954	3	BP	GO:0031954	positive regulation of protein autophosphorylation
32727	3	BP	GO:0032727	positive regulation of interferon-alpha production
32731	3	BP	GO:0032731	positive regulation of interleukin-1 beta production
32922	3	BP	GO:0032922	circadian regulation of gene expression
34034	3	BP	GO:0034034	purine nucleoside bisphosphate catabolic process
34123	3	BP	GO:0034123	positive regulation of toll-like receptor signaling pathway
34763	3	BP	GO:0034763	negative regulation of transmembrane transport
35019	3	BP	GO:0035019	somatic stem cell population maintenance
35112	3	BP	GO:0035112	genitalia morphogenesis
35914	3	BP	GO:0035914	skeletal muscle cell differentiation
42026	3	BP	GO:0042026	protein refolding
43066	3	BP	GO:0043066	negative regulation of apoptotic process
43154	3	BP	GO:0043154	negative regulation of cysteine-type endopeptidase activity involved in apoptotic process
43666	3	BP	GO:0043666	regulation of phosphoprotein phosphatase activity
43691	3	BP	GO:0043691	reverse cholesterol transport
44597	3	BP	GO:0044597	daunorubicin metabolic process
45087	3	BP	GO:0045087	innate immune response
45666	3	BP	GO:0045666	positive regulation of neuron differentiation
45766	3	BP	GO:0045766	positive regulation of angiogenesis
46185	3	BP	GO:0046185	aldehyde catabolic process
46496	3	BP	GO:0046496	nicotinamide nucleotide metabolic process
48663	3	BP	GO:0048663	neuron fate commitment
50777	3	BP	GO:0050777	negative regulation of immune response
60612	3	BP	GO:0060612	adipose tissue development
60986	3	BP	GO:0060986	endocrine hormone secretion
6099	3	BP	GO:0006099	tricarboxylic acid cycle
6107	3	BP	GO:0006107	oxaloacetate metabolic process
61900	3	BP	GO:0061900	glial cell activation
6306	3	BP	GO:0006306	DNA methylation
6390	3	BP	GO:0006390	mitochondrial transcription
6641	3	BP	GO:0006641	triglyceride metabolic process
6693	3	BP	GO:0006693	prostaglandin metabolic process
70427	3	BP	GO:0070427	nucleotide-binding oligomerization domain containing 1 signaling pathway
7062	3	BP	GO:0007062	sister chromatid cohesion
71230	3	BP	GO:0071230	cellular response to amino acid stimulus
71499	3	BP	GO:0071499	cellular response to laminar fluid shear stress
72203	3	BP	GO:0072203	cell proliferation involved in metanephros development
7611	3	BP	GO:0007611	learning or memory
97192	3	BP	GO:0097192	extrinsic apoptotic signaling pathway in absence of ligand

## Sheet: 33_Steatosis_AOP_genes TopGO-Re
Cluster_name	Freq	GO_group	TermID	Name
1903580	5	BP	GO:1903580	positive regulation of ATP metabolic process
33189	5	BP	GO:0033189	response to vitamin A
6633	5	BP	GO:0006633	fatty acid biosynthetic process
90181	5	BP	GO:0090181	regulation of cholesterol metabolic process
10887	4	BP	GO:0010887	negative regulation of cholesterol storage
34379	4	BP	GO:0034379	very-low-density lipoprotein particle assembly
50796	4	BP	GO:0050796	regulation of insulin secretion
8210	4	BP	GO:0008210	estrogen metabolic process
1901653	3	BP	GO:1901653	cellular response to peptide
32000	3	BP	GO:0032000	positive regulation of fatty acid beta-oxidation
42632	3	BP	GO:0042632	cholesterol homeostasis
43401	3	BP	GO:0043401	steroid hormone mediated signaling pathway
45471	3	BP	GO:0045471	response to ethanol
6084	3	BP	GO:0006084	acetyl-CoA metabolic process
70508	3	BP	GO:0070508	cholesterol import
