# Supplementary material for: Assessing network-based methods in the context of system toxicology
Source: Front Pharmacol. 2023 Jul 12;14:1225697. doi: 10.3389/fphar.2023.1225697 (PMC10369070; doi:10.3389/fphar.2023.1225697)
Supplement: Supplementary file 2 [file Table3.XLSX]

## Sheet: File description
This file include the clusters with more than 3 GO terms.
The enrichemnt analysis was performed with GO Biological Processes (BP) terms
There are 5 spreadsheet, one for each Network approach, and for the 33 genes from the Liver Steatosis AOPs (33_Steatosis_AOP_genes TopGO-Revigo Annotation).
Structure of spreadsheet
Representative	Cluster name obtained from REVIGO. The string of numbers is the GO ID representative of the cluster. (ex: GO:0010332 → 0010332).
TermID	Gene Ontology ID.
Name	Gene Ontology name.
GO_group	The gene ontology terms are grouped in the Biological Process (BP).
size_go_terms	Number of GO terms annotated with each Network approach.
go_terms_in_cluster	Number of GO terms clustered.
num_clusters	Number of clusters obtained after execute REVIGO.
Num_Go_terms_per_cluster	Number of GO terms clustered in clusters ≤ 3 GO terms.
Num_Go_terms_per_cluster	Number of clusters >= 3 GO terms.
groups	Groups obtained from MONET (574, 1194, 1237,1315,1316, 1330) (only for MONET TopGO-Revigo annotation speardsheet).
Warning! For the MONET approach we analyzed the 6 clusters individually. The values are sorted according to the 6 clusters.

## Sheet: GUILD TopGO-Revigo annotation
Representative	TermID	Name	GO_group	size_go_terms	go_terms_in_cluster	num_clusters	Num_Go_terms_per_cluster	clusters_big_eq_3_GO_terms
10332	GO:0010332	response to gamma radiation	BP	1529	1017	253	4	146
10332	GO:0010165	response to X-ray	BP	1529	1017	253	4	146
10332	GO:0071479	cellular response to ionizing radiation	BP	1529	1017	253	4	146
10332	GO:0071480	cellular response to gamma radiation	BP	1529	1017	253	4	146
10507	GO:0010507	negative regulation of autophagy	BP	1529	1017	253	11	146
10507	GO:0010508	positive regulation of autophagy	BP	1529	1017	253	11	146
10507	GO:0016239	positive regulation of macroautophagy	BP	1529	1017	253	11	146
10507	GO:0016242	negative regulation of macroautophagy	BP	1529	1017	253	11	146
10507	GO:0031330	negative regulation of cellular catabolic process	BP	1529	1017	253	11	146
10507	GO:0042177	negative regulation of protein catabolic process	BP	1529	1017	253	11	146
10507	GO:0090141	positive regulation of mitochondrial fission	BP	1529	1017	253	11	146
10507	GO:0090200	positive regulation of release of cytochrome c from mitochondria	BP	1529	1017	253	11	146
10507	GO:0090201	negative regulation of release of cytochrome c from mitochondria	BP	1529	1017	253	11	146
10507	GO:1903599	positive regulation of autophagy of mitochondrion	BP	1529	1017	253	11	146
10507	GO:1904417	positive regulation of xenophagy	BP	1529	1017	253	11	146
10517	GO:0010517	regulation of phospholipase activity	BP	1529	1017	253	3	146
10517	GO:0010863	positive regulation of phospholipase C activity	BP	1529	1017	253	3	146
10517	GO:0051005	negative regulation of lipoprotein lipase activity	BP	1529	1017	253	3	146
10611	GO:0010611	regulation of cardiac muscle hypertrophy	BP	1529	1017	253	6	146
10611	GO:0014741	negative regulation of muscle hypertrophy	BP	1529	1017	253	6	146
10611	GO:0014745	negative regulation of muscle adaptation	BP	1529	1017	253	6	146
10611	GO:0014874	response to stimulus involved in regulation of muscle adaptation	BP	1529	1017	253	6	146
10611	GO:0061052	negative regulation of cell growth involved in cardiac muscle cell development	BP	1529	1017	253	6	146
10611	GO:1903243	negative regulation of cardiac muscle hypertrophy in response to stress	BP	1529	1017	253	6	146
10666	GO:0010666	positive regulation of cardiac muscle cell apoptotic process	BP	1529	1017	253	4	146
10666	GO:0010667	negative regulation of cardiac muscle cell apoptotic process	BP	1529	1017	253	4	146
10666	GO:0034392	negative regulation of smooth muscle cell apoptotic process	BP	1529	1017	253	4	146
10666	GO:1905459	regulation of vascular associated smooth muscle cell apoptotic process	BP	1529	1017	253	4	146
10746	GO:0010746	regulation of long-chain fatty acid import across plasma membrane	BP	1529	1017	253	4	146
10746	GO:0002036	regulation of L-glutamate import across plasma membrane	BP	1529	1017	253	4	146
10746	GO:0010958	regulation of amino acid import across plasma membrane	BP	1529	1017	253	4	146
10746	GO:0051957	positive regulation of amino acid transport	BP	1529	1017	253	4	146
10803	GO:0010803	regulation of tumor necrosis factor-mediated signaling pathway	BP	1529	1017	253	10	146
10803	GO:0001960	negative regulation of cytokine-mediated signaling pathway	BP	1529	1017	253	10	146
10803	GO:0001961	positive regulation of cytokine-mediated signaling pathway	BP	1529	1017	253	10	146
10803	GO:0010804	negative regulation of tumor necrosis factor-mediated signaling pathway	BP	1529	1017	253	10	146
10803	GO:0060338	regulation of type I interferon-mediated signaling pathway	BP	1529	1017	253	10	146
10803	GO:0060339	negative regulation of type I interferon-mediated signaling pathway	BP	1529	1017	253	10	146
10803	GO:0060340	positive regulation of type I interferon-mediated signaling pathway	BP	1529	1017	253	10	146
10803	GO:0060760	positive regulation of response to cytokine stimulus	BP	1529	1017	253	10	146
10803	GO:0070099	regulation of chemokine-mediated signaling pathway	BP	1529	1017	253	10	146
10803	GO:1903265	positive regulation of tumor necrosis factor-mediated signaling pathway	BP	1529	1017	253	10	146
10832	GO:0010832	negative regulation of myotube differentiation	BP	1529	1017	253	3	146
10832	GO:0051149	positive regulation of muscle cell differentiation	BP	1529	1017	253	3	146
10832	GO:0051153	regulation of striated muscle cell differentiation	BP	1529	1017	253	3	146
10875	GO:0010875	positive regulation of cholesterol efflux	BP	1529	1017	253	12	146
10875	GO:0010884	positive regulation of lipid storage	BP	1529	1017	253	12	146
10875	GO:0010886	positive regulation of cholesterol storage	BP	1529	1017	253	12	146
10875	GO:0010887	negative regulation of cholesterol storage	BP	1529	1017	253	12	146
10875	GO:0010888	negative regulation of lipid storage	BP	1529	1017	253	12	146
10875	GO:0010891	negative regulation of sequestering of triglyceride	BP	1529	1017	253	12	146
10875	GO:0032303	regulation of icosanoid secretion	BP	1529	1017	253	12	146
10875	GO:0032308	positive regulation of prostaglandin secretion	BP	1529	1017	253	12	146
10875	GO:0032369	negative regulation of lipid transport	BP	1529	1017	253	12	146
10875	GO:0032375	negative regulation of cholesterol transport	BP	1529	1017	253	12	146
10875	GO:0032383	regulation of intracellular cholesterol transport	BP	1529	1017	253	12	146
10875	GO:2000192	negative regulation of fatty acid transport	BP	1529	1017	253	12	146
122	GO:0000122	negative regulation of transcription by RNA polymerase II	BP	1529	1017	253	3	146
122	GO:0010558	negative regulation of macromolecule biosynthetic process	BP	1529	1017	253	3	146
122	GO:0031327	negative regulation of cellular biosynthetic process	BP	1529	1017	253	3	146
14911	GO:0014911	positive regulation of smooth muscle cell migration	BP	1529	1017	253	3	146
14911	GO:0014912	negative regulation of smooth muscle cell migration	BP	1529	1017	253	3	146
14911	GO:1904754	positive regulation of vascular associated smooth muscle cell migration	BP	1529	1017	253	3	146
1525	GO:0001525	angiogenesis	BP	1529	1017	253	7	146
1525	GO:0001568	blood vessel development	BP	1529	1017	253	7	146
1525	GO:0001569	branching involved in blood vessel morphogenesis	BP	1529	1017	253	7	146
1525	GO:0001570	vasculogenesis	BP	1529	1017	253	7	146
1525	GO:0007507	heart development	BP	1529	1017	253	7	146
1525	GO:0048514	blood vessel morphogenesis	BP	1529	1017	253	7	146
1525	GO:0048754	branching morphogenesis of an epithelial tube	BP	1529	1017	253	7	146
1649	GO:0001649	osteoblast differentiation	BP	1529	1017	253	3	146
1649	GO:0030282	bone mineralization	BP	1529	1017	253	3	146
1649	GO:0070166	enamel mineralization	BP	1529	1017	253	3	146
17148	GO:0017148	negative regulation of translation	BP	1529	1017	253	3	146
17148	GO:0034249	negative regulation of amide metabolic process	BP	1529	1017	253	3	146
17148	GO:0034250	positive regulation of amide metabolic process	BP	1529	1017	253	3	146
1844	GO:0001844	protein insertion into mitochondrial membrane involved in apoptotic signaling pathway	BP	1529	1017	253	3	146
1844	GO:0097345	mitochondrial outer membrane permeabilization	BP	1529	1017	253	3	146
1844	GO:1901030	positive regulation of mitochondrial outer membrane permeabilization involved in apoptotic signaling pathway	BP	1529	1017	253	3	146
1889	GO:0001889	liver development	BP	1529	1017	253	5	146
1889	GO:0030879	mammary gland development	BP	1529	1017	253	5	146
1889	GO:0070365	hepatocyte differentiation	BP	1529	1017	253	5	146
1889	GO:0072574	hepatocyte proliferation	BP	1529	1017	253	5	146
1889	GO:0097421	liver regeneration	BP	1529	1017	253	5	146
1900369	GO:1900369	negative regulation of post-transcriptional gene silencing by RNA	BP	1529	1017	253	5	146
1900369	GO:0060965	negative regulation of miRNA-mediated gene silencing	BP	1529	1017	253	5	146
1900369	GO:1900370	positive regulation of post-transcriptional gene silencing by RNA	BP	1529	1017	253	5	146
1900369	GO:1903799	negative regulation of miRNA maturation	BP	1529	1017	253	5	146
1900369	GO:1903800	positive regulation of miRNA maturation	BP	1529	1017	253	5	146
1902895	GO:1902895	positive regulation of miRNA transcription	BP	1529	1017	253	4	146
1902895	GO:1902894	negative regulation of miRNA transcription	BP	1529	1017	253	4	146
1902895	GO:2000629	negative regulation of miRNA metabolic process	BP	1529	1017	253	4	146
1902895	GO:2000630	positive regulation of miRNA metabolic process	BP	1529	1017	253	4	146
1903055	GO:1903055	positive regulation of extracellular matrix organization	BP	1529	1017	253	3	146
1903055	GO:0010715	regulation of extracellular matrix disassembly	BP	1529	1017	253	3	146
1903055	GO:1901201	regulation of extracellular matrix assembly	BP	1529	1017	253	3	146
1903140	GO:1903140	regulation of establishment of endothelial barrier	BP	1529	1017	253	3	146
1903140	GO:0030857	negative regulation of epithelial cell differentiation	BP	1529	1017	253	3	146
1903140	GO:0045602	negative regulation of endothelial cell differentiation	BP	1529	1017	253	3	146
1904646	GO:1904646	cellular response to amyloid-beta	BP	1529	1017	253	7	146
1904646	GO:0008286	insulin receptor signaling pathway	BP	1529	1017	253	7	146
1904646	GO:0032868	response to insulin	BP	1529	1017	253	7	146
1904646	GO:0032869	cellular response to insulin stimulus	BP	1529	1017	253	7	146
1904646	GO:0043434	response to peptide hormone	BP	1529	1017	253	7	146
1904646	GO:0071417	cellular response to organonitrogen compound	BP	1529	1017	253	7	146
1904646	GO:1904385	cellular response to angiotensin	BP	1529	1017	253	7	146
1938	GO:0001938	positive regulation of endothelial cell proliferation	BP	1529	1017	253	6	146
1938	GO:0001937	negative regulation of endothelial cell proliferation	BP	1529	1017	253	6	146
1938	GO:0050679	positive regulation of epithelial cell proliferation	BP	1529	1017	253	6	146
1938	GO:0050680	negative regulation of epithelial cell proliferation	BP	1529	1017	253	6	146
1938	GO:1903587	regulation of blood vessel endothelial cell proliferation involved in sprouting angiogenesis	BP	1529	1017	253	6	146
1938	GO:1905564	positive regulation of vascular endothelial cell proliferation	BP	1529	1017	253	6	146
1953	GO:0001953	negative regulation of cell-matrix adhesion	BP	1529	1017	253	8	146
1953	GO:0001954	positive regulation of cell-matrix adhesion	BP	1529	1017	253	8	146
1953	GO:0002695	negative regulation of leukocyte activation	BP	1529	1017	253	8	146
1953	GO:0022408	negative regulation of cell-cell adhesion	BP	1529	1017	253	8	146
1953	GO:0042130	negative regulation of T cell proliferation	BP	1529	1017	253	8	146
1953	GO:0051894	positive regulation of focal adhesion assembly	BP	1529	1017	253	8	146
1953	GO:0120183	positive regulation of focal adhesion disassembly	BP	1529	1017	253	8	146
1953	GO:1903038	negative regulation of leukocyte cell-cell adhesion	BP	1529	1017	253	8	146
19722	GO:0019722	calcium-mediated signaling	BP	1529	1017	253	5	146
19722	GO:0007263	nitric oxide mediated signal transduction	BP	1529	1017	253	5	146
19722	GO:0019934	cGMP-mediated signaling	BP	1529	1017	253	5	146
19722	GO:0048016	inositol phosphate-mediated signaling	BP	1529	1017	253	5	146
19722	GO:0097720	calcineurin-mediated signaling	BP	1529	1017	253	5	146
1974	GO:0001974	blood vessel remodeling	BP	1529	1017	253	7	146
1974	GO:0045453	bone resorption	BP	1529	1017	253	7	146
1974	GO:0060056	mammary gland involution	BP	1529	1017	253	7	146
1974	GO:0060603	mammary gland duct morphogenesis	BP	1529	1017	253	7	146
1974	GO:0060644	mammary gland epithelial cell differentiation	BP	1529	1017	253	7	146
1974	GO:0060745	mammary gland branching involved in pregnancy	BP	1529	1017	253	7	146
1974	GO:0060751	branch elongation involved in mammary gland duct branching	BP	1529	1017	253	7	146
1990090	GO:1990090	cellular response to nerve growth factor stimulus	BP	1529	1017	253	3	146
1990090	GO:0038180	nerve growth factor signaling pathway	BP	1529	1017	253	3	146
1990090	GO:0048011	neurotrophin TRK receptor signaling pathway	BP	1529	1017	253	3	146
1990440	GO:1990440	positive regulation of transcription from RNA polymerase II promoter in response to endoplasmic reticulum stress	BP	1529	1017	253	5	146
1990440	GO:0036091	positive regulation of transcription from RNA polymerase II promoter in response to oxidative stress	BP	1529	1017	253	5	146
1990440	GO:0043618	regulation of transcription from RNA polymerase II promoter in response to stress	BP	1529	1017	253	5	146
1990440	GO:0043619	regulation of transcription from RNA polymerase II promoter in response to oxidative stress	BP	1529	1017	253	5	146
1990440	GO:0061419	positive regulation of transcription from RNA polymerase II promoter in response to hypoxia	BP	1529	1017	253	5	146
2000352	GO:2000352	negative regulation of endothelial cell apoptotic process	BP	1529	1017	253	6	146
2000352	GO:1902172	regulation of keratinocyte apoptotic process	BP	1529	1017	253	6	146
2000352	GO:1903944	negative regulation of hepatocyte apoptotic process	BP	1529	1017	253	6	146
2000352	GO:1904037	positive regulation of epithelial cell apoptotic process	BP	1529	1017	253	6	146
2000352	GO:2000353	positive regulation of endothelial cell apoptotic process	BP	1529	1017	253	6	146
2000352	GO:2000674	regulation of type B pancreatic cell apoptotic process	BP	1529	1017	253	6	146
2000379	GO:2000379	positive regulation of reactive oxygen species metabolic process	BP	1529	1017	253	6	146
2000379	GO:0032930	positive regulation of superoxide anion generation	BP	1529	1017	253	6	146
2000379	GO:0090322	regulation of superoxide metabolic process	BP	1529	1017	253	6	146
2000379	GO:1903427	negative regulation of reactive oxygen species biosynthetic process	BP	1529	1017	253	6	146
2000379	GO:1903428	positive regulation of reactive oxygen species biosynthetic process	BP	1529	1017	253	6	146
2000379	GO:2000378	negative regulation of reactive oxygen species metabolic process	BP	1529	1017	253	6	146
2000737	GO:2000737	negative regulation of stem cell differentiation	BP	1529	1017	253	3	146
2000737	GO:1901533	negative regulation of hematopoietic progenitor cell differentiation	BP	1529	1017	253	3	146
2000737	GO:1902036	regulation of hematopoietic stem cell differentiation	BP	1529	1017	253	3	146
2001237	GO:2001237	negative regulation of extrinsic apoptotic signaling pathway	BP	1529	1017	253	17	146
2001237	GO:0043518	negative regulation of DNA damage response, signal transduction by p53 class mediator	BP	1529	1017	253	17	146
2001237	GO:1900103	positive regulation of endoplasmic reticulum unfolded protein response	BP	1529	1017	253	17	146
2001237	GO:1902042	negative regulation of extrinsic apoptotic signaling pathway via death domain receptors	BP	1529	1017	253	17	146
2001237	GO:1902166	negative regulation of intrinsic apoptotic signaling pathway in response to DNA damage by p53 class mediator	BP	1529	1017	253	17	146
2001237	GO:1902230	negative regulation of intrinsic apoptotic signaling pathway in response to DNA damage	BP	1529	1017	253	17	146
2001237	GO:1902236	negative regulation of endoplasmic reticulum stress-induced intrinsic apoptotic signaling pathway	BP	1529	1017	253	17	146
2001237	GO:1902237	positive regulation of endoplasmic reticulum stress-induced intrinsic apoptotic signaling pathway	BP	1529	1017	253	17	146
2001237	GO:1902254	negative regulation of intrinsic apoptotic signaling pathway by p53 class mediator	BP	1529	1017	253	17	146
2001237	GO:1903071	positive regulation of ER-associated ubiquitin-dependent protein catabolic process	BP	1529	1017	253	17	146
2001237	GO:1903573	negative regulation of response to endoplasmic reticulum stress	BP	1529	1017	253	17	146
2001237	GO:1903896	positive regulation of IRE1-mediated unfolded protein response	BP	1529	1017	253	17	146
2001237	GO:2001234	negative regulation of apoptotic signaling pathway	BP	1529	1017	253	17	146
2001237	GO:2001235	positive regulation of apoptotic signaling pathway	BP	1529	1017	253	17	146
2001237	GO:2001238	positive regulation of extrinsic apoptotic signaling pathway	BP	1529	1017	253	17	146
2001237	GO:2001240	negative regulation of extrinsic apoptotic signaling pathway in absence of ligand	BP	1529	1017	253	17	146
2001237	GO:2001242	regulation of intrinsic apoptotic signaling pathway	BP	1529	1017	253	17	146
2052	GO:0002052	positive regulation of neuroblast proliferation	BP	1529	1017	253	3	146
2052	GO:0007406	negative regulation of neuroblast proliferation	BP	1529	1017	253	3	146
2052	GO:2000178	negative regulation of neural precursor cell proliferation	BP	1529	1017	253	3	146
22011	GO:0022011	myelination in peripheral nervous system	BP	1529	1017	253	4	146
22011	GO:0032287	peripheral nervous system myelin maintenance	BP	1529	1017	253	4	146
22011	GO:0043217	myelin maintenance	BP	1529	1017	253	4	146
22011	GO:0048709	oligodendrocyte differentiation	BP	1529	1017	253	4	146
2230	GO:0002230	positive regulation of defense response to virus by host	BP	1529	1017	253	3	146
2230	GO:0050687	negative regulation of defense response to virus	BP	1529	1017	253	3	146
2230	GO:0050691	regulation of defense response to virus by host	BP	1529	1017	253	3	146
2281	GO:0002281	macrophage activation involved in immune response	BP	1529	1017	253	3	146
2281	GO:0001773	myeloid dendritic cell activation	BP	1529	1017	253	3	146
2281	GO:0042119	neutrophil activation	BP	1529	1017	253	3	146
2579	GO:0002579	positive regulation of antigen processing and presentation	BP	1529	1017	253	4	146
2579	GO:0002578	negative regulation of antigen processing and presentation	BP	1529	1017	253	4	146
2579	GO:0002580	regulation of antigen processing and presentation of peptide or polysaccharide antigen via MHC class II	BP	1529	1017	253	4	146
2579	GO:0002604	regulation of dendritic cell antigen processing and presentation	BP	1529	1017	253	4	146
2755	GO:0002755	MyD88-dependent toll-like receptor signaling pathway	BP	1529	1017	253	4	146
2755	GO:0002756	MyD88-independent toll-like receptor signaling pathway	BP	1529	1017	253	4	146
2755	GO:0034142	toll-like receptor 4 signaling pathway	BP	1529	1017	253	4	146
2755	GO:0035666	TRIF-dependent toll-like receptor signaling pathway	BP	1529	1017	253	4	146
2821	GO:0002821	positive regulation of adaptive immune response	BP	1529	1017	253	9	146
2821	GO:0001910	regulation of leukocyte mediated cytotoxicity	BP	1529	1017	253	9	146
2821	GO:0001914	regulation of T cell mediated cytotoxicity	BP	1529	1017	253	9	146
2821	GO:0002710	negative regulation of T cell mediated immunity	BP	1529	1017	253	9	146
2821	GO:0002711	positive regulation of T cell mediated immunity	BP	1529	1017	253	9	146
2821	GO:0002822	regulation of adaptive immune response based on somatic recombination of immune receptors built from immunoglobulin superfamily domains	BP	1529	1017	253	9	146
2821	GO:0002840	regulation of T cell mediated immune response to tumor cell	BP	1529	1017	253	9	146
2821	GO:0002889	regulation of immunoglobulin mediated immune response	BP	1529	1017	253	9	146
2821	GO:0031343	positive regulation of cell killing	BP	1529	1017	253	9	146
2903	GO:0002903	negative regulation of B cell apoptotic process	BP	1529	1017	253	6	146
2903	GO:0002902	regulation of B cell apoptotic process	BP	1529	1017	253	6	146
2903	GO:0070230	positive regulation of lymphocyte apoptotic process	BP	1529	1017	253	6	146
2903	GO:0070234	positive regulation of T cell apoptotic process	BP	1529	1017	253	6	146
2903	GO:0070243	regulation of thymocyte apoptotic process	BP	1529	1017	253	6	146
2903	GO:2000108	positive regulation of leukocyte apoptotic process	BP	1529	1017	253	6	146
30183	GO:0030183	B cell differentiation	BP	1529	1017	253	10	146
30183	GO:0002327	immature B cell differentiation	BP	1529	1017	253	10	146
30183	GO:0002360	T cell lineage commitment	BP	1529	1017	253	10	146
30183	GO:0030217	T cell differentiation	BP	1529	1017	253	10	146
30183	GO:0033077	T cell differentiation in thymus	BP	1529	1017	253	10	146
30183	GO:0042110	T cell activation	BP	1529	1017	253	10	146
30183	GO:0042113	B cell activation	BP	1529	1017	253	10	146
30183	GO:0043368	positive T cell selection	BP	1529	1017	253	10	146
30183	GO:0045058	T cell selection	BP	1529	1017	253	10	146
30183	GO:0097028	dendritic cell differentiation	BP	1529	1017	253	10	146
30225	GO:0030225	macrophage differentiation	BP	1529	1017	253	3	146
30225	GO:0030224	monocyte differentiation	BP	1529	1017	253	3	146
30225	GO:0030316	osteoclast differentiation	BP	1529	1017	253	3	146
30308	GO:0030308	negative regulation of cell growth	BP	1529	1017	253	5	146
30308	GO:0001558	regulation of cell growth	BP	1529	1017	253	5	146
30308	GO:0030307	positive regulation of cell growth	BP	1529	1017	253	5	146
30308	GO:0048638	regulation of developmental growth	BP	1529	1017	253	5	146
30308	GO:0048639	positive regulation of developmental growth	BP	1529	1017	253	5	146
30512	GO:0030512	negative regulation of transforming growth factor beta receptor signaling pathway	BP	1529	1017	253	5	146
30512	GO:0017015	regulation of transforming growth factor beta receptor signaling pathway	BP	1529	1017	253	5	146
30512	GO:0030514	negative regulation of BMP signaling pathway	BP	1529	1017	253	5	146
30512	GO:0060394	negative regulation of pathway-restricted SMAD protein phosphorylation	BP	1529	1017	253	5	146
30512	GO:0090288	negative regulation of cellular response to growth factor stimulus	BP	1529	1017	253	5	146
30593	GO:0030593	neutrophil chemotaxis	BP	1529	1017	253	7	146
30593	GO:0002407	dendritic cell chemotaxis	BP	1529	1017	253	7	146
30593	GO:0002548	monocyte chemotaxis	BP	1529	1017	253	7	146
30593	GO:0045123	cellular extravasation	BP	1529	1017	253	7	146
30593	GO:0060326	cell chemotaxis	BP	1529	1017	253	7	146
30593	GO:0072672	neutrophil extravasation	BP	1529	1017	253	7	146
30593	GO:0097531	mast cell migration	BP	1529	1017	253	7	146
30890	GO:0030890	positive regulation of B cell proliferation	BP	1529	1017	253	8	146
30890	GO:0030889	negative regulation of B cell proliferation	BP	1529	1017	253	8	146
30890	GO:0032819	positive regulation of natural killer cell proliferation	BP	1529	1017	253	8	146
30890	GO:0032825	positive regulation of natural killer cell differentiation	BP	1529	1017	253	8	146
30890	GO:0042102	positive regulation of T cell proliferation	BP	1529	1017	253	8	146
30890	GO:0042104	positive regulation of activated T cell proliferation	BP	1529	1017	253	8	146
30890	GO:0042129	regulation of T cell proliferation	BP	1529	1017	253	8	146
30890	GO:0070664	negative regulation of leukocyte proliferation	BP	1529	1017	253	8	146
31069	GO:0031069	hair follicle morphogenesis	BP	1529	1017	253	3	146
31069	GO:0030216	keratinocyte differentiation	BP	1529	1017	253	3	146
31069	GO:0060789	hair follicle placode formation	BP	1529	1017	253	3	146
31103	GO:0031103	axon regeneration	BP	1529	1017	253	3	146
31103	GO:0031100	animal organ regeneration	BP	1529	1017	253	3	146
31103	GO:0043403	skeletal muscle tissue regeneration	BP	1529	1017	253	3	146
31397	GO:0031397	negative regulation of protein ubiquitination	BP	1529	1017	253	10	146
31397	GO:0001933	negative regulation of protein phosphorylation	BP	1529	1017	253	10	146
31397	GO:0006469	negative regulation of protein kinase activity	BP	1529	1017	253	10	146
31397	GO:0031398	positive regulation of protein ubiquitination	BP	1529	1017	253	10	146
31397	GO:0033233	regulation of protein sumoylation	BP	1529	1017	253	10	146
31397	GO:0042326	negative regulation of phosphorylation	BP	1529	1017	253	10	146
31397	GO:0043407	negative regulation of MAP kinase activity	BP	1529	1017	253	10	146
31397	GO:0045736	negative regulation of cyclin-dependent protein serine/threonine kinase activity	BP	1529	1017	253	10	146
31397	GO:0051444	negative regulation of ubiquitin-protein transferase activity	BP	1529	1017	253	10	146
31397	GO:0071901	negative regulation of protein serine/threonine kinase activity	BP	1529	1017	253	10	146
31507	GO:0031507	heterochromatin formation	BP	1529	1017	253	3	146
31507	GO:0006346	DNA methylation-dependent heterochromatin formation	BP	1529	1017	253	3	146
31507	GO:0031509	subtelomeric heterochromatin formation	BP	1529	1017	253	3	146
3151	GO:0003151	outflow tract morphogenesis	BP	1529	1017	253	5	146
3151	GO:0003222	ventricular trabecula myocardium morphogenesis	BP	1529	1017	253	5	146
3151	GO:0003223	ventricular compact myocardium morphogenesis	BP	1529	1017	253	5	146
3151	GO:0060411	cardiac septum morphogenesis	BP	1529	1017	253	5	146
3151	GO:0060412	ventricular septum morphogenesis	BP	1529	1017	253	5	146
31622	GO:0031622	positive regulation of fever generation	BP	1529	1017	253	3	146
31622	GO:0002674	negative regulation of acute inflammatory response	BP	1529	1017	253	3	146
31622	GO:0002675	positive regulation of acute inflammatory response	BP	1529	1017	253	3	146
32024	GO:0032024	positive regulation of insulin secretion	BP	1529	1017	253	8	146
32024	GO:0035774	positive regulation of insulin secretion involved in cellular response to glucose stimulus	BP	1529	1017	253	8	146
32024	GO:0046887	positive regulation of hormone secretion	BP	1529	1017	253	8	146
32024	GO:0050709	negative regulation of protein secretion	BP	1529	1017	253	8	146
32024	GO:0050714	positive regulation of protein secretion	BP	1529	1017	253	8	146
32024	GO:0050796	regulation of insulin secretion	BP	1529	1017	253	8	146
32024	GO:0090278	negative regulation of peptide hormone secretion	BP	1529	1017	253	8	146
32024	GO:1903531	negative regulation of secretion by cell	BP	1529	1017	253	8	146
32057	GO:0032057	negative regulation of translational initiation in response to stress	BP	1529	1017	253	4	146
32057	GO:0043558	regulation of translational initiation in response to stress	BP	1529	1017	253	4	146
32057	GO:0045727	positive regulation of translation	BP	1529	1017	253	4	146
32057	GO:0045948	positive regulation of translational initiation	BP	1529	1017	253	4	146
32091	GO:0032091	negative regulation of protein binding	BP	1529	1017	253	4	146
32091	GO:0032092	positive regulation of protein binding	BP	1529	1017	253	4	146
32091	GO:0043393	regulation of protein binding	BP	1529	1017	253	4	146
32091	GO:0051101	regulation of DNA binding	BP	1529	1017	253	4	146
32570	GO:0032570	response to progesterone	BP	1529	1017	253	5	146
32570	GO:0043401	steroid hormone mediated signaling pathway	BP	1529	1017	253	5	146
32570	GO:0051384	response to glucocorticoid	BP	1529	1017	253	5	146
32570	GO:0071385	cellular response to glucocorticoid stimulus	BP	1529	1017	253	5	146
32570	GO:0071549	cellular response to dexamethasone stimulus	BP	1529	1017	253	5	146
32722	GO:0032722	positive regulation of chemokine production	BP	1529	1017	253	6	146
32722	GO:0032682	negative regulation of chemokine production	BP	1529	1017	253	6	146
32722	GO:0071638	negative regulation of monocyte chemotactic protein-1 production	BP	1529	1017	253	6	146
32722	GO:0071639	positive regulation of monocyte chemotactic protein-1 production	BP	1529	1017	253	6	146
32722	GO:0071649	regulation of chemokine (C-C motif) ligand 5 production	BP	1529	1017	253	6	146
32722	GO:2000343	positive regulation of chemokine (C-X-C motif) ligand 2 production	BP	1529	1017	253	6	146
32728	GO:0032728	positive regulation of interferon-beta production	BP	1529	1017	253	4	146
32728	GO:0032480	negative regulation of type I interferon production	BP	1529	1017	253	4	146
32728	GO:0032481	positive regulation of type I interferon production	BP	1529	1017	253	4	146
32728	GO:0032727	positive regulation of interferon-alpha production	BP	1529	1017	253	4	146
32731	GO:0032731	positive regulation of interleukin-1 beta production	BP	1529	1017	253	3	146
32731	GO:0032691	negative regulation of interleukin-1 beta production	BP	1529	1017	253	3	146
32731	GO:0032692	negative regulation of interleukin-1 production	BP	1529	1017	253	3	146
32922	GO:0032922	circadian regulation of gene expression	BP	1529	1017	253	3	146
32922	GO:0007623	circadian rhythm	BP	1529	1017	253	3	146
32922	GO:0045475	locomotor rhythm	BP	1529	1017	253	3	146
33034	GO:0033034	positive regulation of myeloid cell apoptotic process	BP	1529	1017	253	4	146
33034	GO:0033029	regulation of neutrophil apoptotic process	BP	1529	1017	253	4	146
33034	GO:0033033	negative regulation of myeloid cell apoptotic process	BP	1529	1017	253	4	146
33034	GO:2000109	regulation of macrophage apoptotic process	BP	1529	1017	253	4	146
34104	GO:0034104	negative regulation of tissue remodeling	BP	1529	1017	253	4	146
34104	GO:0045780	positive regulation of bone resorption	BP	1529	1017	253	4	146
34104	GO:0046850	regulation of bone remodeling	BP	1529	1017	253	4	146
34104	GO:1905203	regulation of connective tissue replacement	BP	1529	1017	253	4	146
34123	GO:0034123	positive regulation of toll-like receptor signaling pathway	BP	1529	1017	253	3	146
34123	GO:0070432	regulation of nucleotide-binding oligomerization domain containing 2 signaling pathway	BP	1529	1017	253	3	146
34123	GO:0070434	positive regulation of nucleotide-binding oligomerization domain containing 2 signaling pathway	BP	1529	1017	253	3	146
34136	GO:0034136	negative regulation of toll-like receptor 2 signaling pathway	BP	1529	1017	253	5	146
34136	GO:0034121	regulation of toll-like receptor signaling pathway	BP	1529	1017	253	5	146
34136	GO:0034143	regulation of toll-like receptor 4 signaling pathway	BP	1529	1017	253	5	146
34136	GO:0039531	regulation of viral-induced cytoplasmic pattern recognition receptor signaling pathway	BP	1529	1017	253	5	146
34136	GO:0070424	regulation of nucleotide-binding oligomerization domain containing signaling pathway	BP	1529	1017	253	5	146
34372	GO:0034372	very-low-density lipoprotein particle remodeling	BP	1529	1017	253	5	146
34372	GO:0034374	low-density lipoprotein particle remodeling	BP	1529	1017	253	5	146
34372	GO:0034380	high-density lipoprotein particle assembly	BP	1529	1017	253	5	146
34372	GO:0034381	plasma lipoprotein particle clearance	BP	1529	1017	253	5	146
34372	GO:0034384	high-density lipoprotein particle clearance	BP	1529	1017	253	5	146
35066	GO:0035066	positive regulation of histone acetylation	BP	1529	1017	253	8	146
35066	GO:0031065	positive regulation of histone deacetylation	BP	1529	1017	253	8	146
35066	GO:0051571	positive regulation of histone H3-K4 methylation	BP	1529	1017	253	8	146
35066	GO:0090241	negative regulation of histone H4 acetylation	BP	1529	1017	253	8	146
35066	GO:1901674	regulation of histone H3-K27 acetylation	BP	1529	1017	253	8	146
35066	GO:1901984	negative regulation of protein acetylation	BP	1529	1017	253	8	146
35066	GO:1901985	positive regulation of protein acetylation	BP	1529	1017	253	8	146
35066	GO:2000758	positive regulation of peptidyl-lysine acetylation	BP	1529	1017	253	8	146
36499	GO:0036499	PERK-mediated unfolded protein response	BP	1529	1017	253	6	146
36499	GO:0006983	ER overload response	BP	1529	1017	253	6	146
36499	GO:0032933	SREBP signaling pathway	BP	1529	1017	253	6	146
36499	GO:0034620	cellular response to unfolded protein	BP	1529	1017	253	6	146
36499	GO:0036500	ATF6-mediated unfolded protein response	BP	1529	1017	253	6	146
36499	GO:0071712	ER-associated misfolded protein catabolic process	BP	1529	1017	253	6	146
42060	GO:0042060	wound healing	BP	1529	1017	253	4	146
42060	GO:0030168	platelet activation	BP	1529	1017	253	4	146
42060	GO:0048678	response to axon injury	BP	1529	1017	253	4	146
42060	GO:0070527	platelet aggregation	BP	1529	1017	253	4	146
42307	GO:0042307	positive regulation of protein import into nucleus	BP	1529	1017	253	8	146
42307	GO:0032388	positive regulation of intracellular transport	BP	1529	1017	253	8	146
42307	GO:0046825	regulation of protein export from nucleus	BP	1529	1017	253	8	146
42307	GO:0046827	positive regulation of protein export from nucleus	BP	1529	1017	253	8	146
42307	GO:1900181	negative regulation of protein localization to nucleus	BP	1529	1017	253	8	146
42307	GO:1900182	positive regulation of protein localization to nucleus	BP	1529	1017	253	8	146
42307	GO:1903214	regulation of protein targeting to mitochondrion	BP	1529	1017	253	8	146
42307	GO:1903749	positive regulation of establishment of protein localization to mitochondrion	BP	1529	1017	253	8	146
42311	GO:0042311	vasodilation	BP	1529	1017	253	7	146
42311	GO:0003018	vascular process in circulatory system	BP	1529	1017	253	7	146
42311	GO:0008015	blood circulation	BP	1529	1017	253	7	146
42311	GO:0045776	negative regulation of blood pressure	BP	1529	1017	253	7	146
42311	GO:0060047	heart contraction	BP	1529	1017	253	7	146
42311	GO:0150104	transport across blood-brain barrier	BP	1529	1017	253	7	146
42311	GO:1990379	lipid transport across blood-brain barrier	BP	1529	1017	253	7	146
42542	GO:0042542	response to hydrogen peroxide	BP	1529	1017	253	5	146
42542	GO:0000302	response to reactive oxygen species	BP	1529	1017	253	5	146
42542	GO:0034599	cellular response to oxidative stress	BP	1529	1017	253	5	146
42542	GO:0034614	cellular response to reactive oxygen species	BP	1529	1017	253	5	146
42542	GO:0070301	cellular response to hydrogen peroxide	BP	1529	1017	253	5	146
43029	GO:0043029	T cell homeostasis	BP	1529	1017	253	7	146
43029	GO:0001782	B cell homeostasis	BP	1529	1017	253	7	146
43029	GO:0002262	myeloid cell homeostasis	BP	1529	1017	253	7	146
43029	GO:0006924	activation-induced cell death of T cells	BP	1529	1017	253	7	146
43029	GO:0030218	erythrocyte differentiation	BP	1529	1017	253	7	146
43029	GO:0070231	T cell apoptotic process	BP	1529	1017	253	7	146
43029	GO:0097350	neutrophil clearance	BP	1529	1017	253	7	146
43032	GO:0043032	positive regulation of macrophage activation	BP	1529	1017	253	4	146
43032	GO:0043031	negative regulation of macrophage activation	BP	1529	1017	253	4	146
43032	GO:0150078	positive regulation of neuroinflammatory response	BP	1529	1017	253	4	146
43032	GO:1903978	regulation of microglial cell activation	BP	1529	1017	253	4	146
43301	GO:0043301	negative regulation of leukocyte degranulation	BP	1529	1017	253	17	146
43301	GO:0033081	regulation of T cell differentiation in thymus	BP	1529	1017	253	17	146
43301	GO:0043306	positive regulation of mast cell degranulation	BP	1529	1017	253	17	146
43301	GO:0043371	negative regulation of CD4-positive, alpha-beta T cell differentiation	BP	1529	1017	253	17	146
43301	GO:0043376	regulation of CD8-positive, alpha-beta T cell differentiation	BP	1529	1017	253	17	146
43301	GO:0045581	negative regulation of T cell differentiation	BP	1529	1017	253	17	146
43301	GO:0045582	positive regulation of T cell differentiation	BP	1529	1017	253	17	146
43301	GO:0045591	positive regulation of regulatory T cell differentiation	BP	1529	1017	253	17	146
43301	GO:0045623	negative regulation of T-helper cell differentiation	BP	1529	1017	253	17	146
43301	GO:0045630	positive regulation of T-helper 2 cell differentiation	BP	1529	1017	253	17	146
43301	GO:0045955	negative regulation of calcium ion-dependent exocytosis	BP	1529	1017	253	17	146
43301	GO:0046638	positive regulation of alpha-beta T cell differentiation	BP	1529	1017	253	17	146
43301	GO:0046640	regulation of alpha-beta T cell proliferation	BP	1529	1017	253	17	146
43301	GO:0050870	positive regulation of T cell activation	BP	1529	1017	253	17	146
43301	GO:1902107	positive regulation of leukocyte differentiation	BP	1529	1017	253	17	146
43301	GO:2000319	regulation of T-helper 17 cell differentiation	BP	1529	1017	253	17	146
43301	GO:2000553	positive regulation of T-helper 2 cell cytokine production	BP	1529	1017	253	17	146
43388	GO:0043388	positive regulation of DNA binding	BP	1529	1017	253	5	146
43388	GO:0043392	negative regulation of DNA binding	BP	1529	1017	253	5	146
43388	GO:1903026	negative regulation of RNA polymerase II regulatory region sequence-specific DNA binding	BP	1529	1017	253	5	146
43388	GO:1904796	regulation of core promoter binding	BP	1529	1017	253	5	146
43388	GO:2000679	positive regulation of transcription regulatory region DNA binding	BP	1529	1017	253	5	146
43525	GO:0043525	positive regulation of neuron apoptotic process	BP	1529	1017	253	15	146
43525	GO:0043065	positive regulation of apoptotic process	BP	1529	1017	253	15	146
43525	GO:0043068	positive regulation of programmed cell death	BP	1529	1017	253	15	146
43525	GO:0043524	negative regulation of neuron apoptotic process	BP	1529	1017	253	15	146
43525	GO:1901215	negative regulation of neuron death	BP	1529	1017	253	15	146
43525	GO:1901216	positive regulation of neuron death	BP	1529	1017	253	15	146
43525	GO:1901299	negative regulation of hydrogen peroxide-mediated programmed cell death	BP	1529	1017	253	15	146
43525	GO:1901300	positive regulation of hydrogen peroxide-mediated programmed cell death	BP	1529	1017	253	15	146
43525	GO:1902176	negative regulation of oxidative stress-induced intrinsic apoptotic signaling pathway	BP	1529	1017	253	15	146
43525	GO:1902177	positive regulation of oxidative stress-induced intrinsic apoptotic signaling pathway	BP	1529	1017	253	15	146
43525	GO:1903204	negative regulation of oxidative stress-induced neuron death	BP	1529	1017	253	15	146
43525	GO:1903223	positive regulation of oxidative stress-induced neuron death	BP	1529	1017	253	15	146
43525	GO:1903376	regulation of oxidative stress-induced neuron intrinsic apoptotic signaling pathway	BP	1529	1017	253	15	146
43525	GO:1903377	negative regulation of oxidative stress-induced neuron intrinsic apoptotic signaling pathway	BP	1529	1017	253	15	146
43525	GO:2001244	positive regulation of intrinsic apoptotic signaling pathway	BP	1529	1017	253	15	146
43536	GO:0043536	positive regulation of blood vessel endothelial cell migration	BP	1529	1017	253	15	146
43536	GO:0002690	positive regulation of leukocyte chemotaxis	BP	1529	1017	253	15	146
43536	GO:0010595	positive regulation of endothelial cell migration	BP	1529	1017	253	15	146
43536	GO:0010634	positive regulation of epithelial cell migration	BP	1529	1017	253	15	146
43536	GO:0010759	positive regulation of macrophage chemotaxis	BP	1529	1017	253	15	146
43536	GO:0030335	positive regulation of cell migration	BP	1529	1017	253	15	146
43536	GO:0030336	negative regulation of cell migration	BP	1529	1017	253	15	146
43536	GO:0050921	positive regulation of chemotaxis	BP	1529	1017	253	15	146
43536	GO:0071677	positive regulation of mononuclear cell migration	BP	1529	1017	253	15	146
43536	GO:0090050	positive regulation of cell migration involved in sprouting angiogenesis	BP	1529	1017	253	15	146
43536	GO:0090051	negative regulation of cell migration involved in sprouting angiogenesis	BP	1529	1017	253	15	146
43536	GO:1902622	regulation of neutrophil migration	BP	1529	1017	253	15	146
43536	GO:1905521	regulation of macrophage migration	BP	1529	1017	253	15	146
43536	GO:2000406	positive regulation of T cell migration	BP	1529	1017	253	15	146
43536	GO:2001026	regulation of endothelial cell chemotaxis	BP	1529	1017	253	15	146
44000	GO:0044000	movement in host	BP	1529	1017	253	4	146
44000	GO:0043922	negative regulation by host of viral transcription	BP	1529	1017	253	4	146
44000	GO:0046718	viral entry into host cell	BP	1529	1017	253	4	146
44000	GO:0051851	modulation by host of symbiont process	BP	1529	1017	253	4	146
45	GO:0000045	autophagosome assembly	BP	1529	1017	253	4	146
45	GO:0000422	autophagy of mitochondrion	BP	1529	1017	253	4	146
45	GO:0000423	mitophagy	BP	1529	1017	253	4	146
45	GO:1905691	lipid droplet disassembly	BP	1529	1017	253	4	146
45471	GO:0045471	response to ethanol	BP	1529	1017	253	4	146
45471	GO:0070723	response to cholesterol	BP	1529	1017	253	4	146
45471	GO:0071380	cellular response to prostaglandin E stimulus	BP	1529	1017	253	4	146
45471	GO:0097306	cellular response to alcohol	BP	1529	1017	253	4	146
45597	GO:0045597	positive regulation of cell differentiation	BP	1529	1017	253	4	146
45597	GO:0010720	positive regulation of cell development	BP	1529	1017	253	4	146
45597	GO:0045596	negative regulation of cell differentiation	BP	1529	1017	253	4	146
45597	GO:0060284	regulation of cell development	BP	1529	1017	253	4	146
45599	GO:0045599	negative regulation of fat cell differentiation	BP	1529	1017	253	3	146
45599	GO:0045600	positive regulation of fat cell differentiation	BP	1529	1017	253	3	146
45599	GO:0090336	positive regulation of brown fat cell differentiation	BP	1529	1017	253	3	146
45648	GO:0045648	positive regulation of erythrocyte differentiation	BP	1529	1017	253	9	146
45648	GO:0002762	negative regulation of myeloid leukocyte differentiation	BP	1529	1017	253	9	146
45648	GO:0030853	negative regulation of granulocyte differentiation	BP	1529	1017	253	9	146
45648	GO:0030854	positive regulation of granulocyte differentiation	BP	1529	1017	253	9	146
45648	GO:0045638	negative regulation of myeloid cell differentiation	BP	1529	1017	253	9	146
45648	GO:0045651	positive regulation of macrophage differentiation	BP	1529	1017	253	9	146
45648	GO:0045655	regulation of monocyte differentiation	BP	1529	1017	253	9	146
45648	GO:0045670	regulation of osteoclast differentiation	BP	1529	1017	253	9	146
45648	GO:0045672	positive regulation of osteoclast differentiation	BP	1529	1017	253	9	146
45766	GO:0045766	positive regulation of angiogenesis	BP	1529	1017	253	4	146
45766	GO:0016525	negative regulation of angiogenesis	BP	1529	1017	253	4	146
45766	GO:1903670	regulation of sprouting angiogenesis	BP	1529	1017	253	4	146
45766	GO:1903672	positive regulation of sprouting angiogenesis	BP	1529	1017	253	4	146
45821	GO:0045821	positive regulation of glycolytic process	BP	1529	1017	253	18	146
45821	GO:0006111	regulation of gluconeogenesis	BP	1529	1017	253	18	146
45821	GO:0006140	regulation of nucleotide metabolic process	BP	1529	1017	253	18	146
45821	GO:0010565	regulation of cellular ketone metabolic process	BP	1529	1017	253	18	146
45821	GO:0010906	regulation of glucose metabolic process	BP	1529	1017	253	18	146
45821	GO:0032885	regulation of polysaccharide biosynthetic process	BP	1529	1017	253	18	146
45821	GO:0043456	regulation of pentose-phosphate shunt	BP	1529	1017	253	18	146
45821	GO:0045721	negative regulation of gluconeogenesis	BP	1529	1017	253	18	146
45821	GO:0045722	positive regulation of gluconeogenesis	BP	1529	1017	253	18	146
45821	GO:0045725	positive regulation of glycogen biosynthetic process	BP	1529	1017	253	18	146
45821	GO:0045820	negative regulation of glycolytic process	BP	1529	1017	253	18	146
45821	GO:0062013	positive regulation of small molecule metabolic process	BP	1529	1017	253	18	146
45821	GO:0062014	negative regulation of small molecule metabolic process	BP	1529	1017	253	18	146
45821	GO:0070874	negative regulation of glycogen metabolic process	BP	1529	1017	253	18	146
45821	GO:1901857	positive regulation of cellular respiration	BP	1529	1017	253	18	146
45821	GO:1903579	negative regulation of ATP metabolic process	BP	1529	1017	253	18	146
45821	GO:1903715	regulation of aerobic respiration	BP	1529	1017	253	18	146
45821	GO:2001171	positive regulation of ATP biosynthetic process	BP	1529	1017	253	18	146
45931	GO:0045931	positive regulation of mitotic cell cycle	BP	1529	1017	253	7	146
45931	GO:0006977	DNA damage response, signal transduction by p53 class mediator resulting in cell cycle arrest	BP	1529	1017	253	7	146
45931	GO:0042771	intrinsic apoptotic signaling pathway in response to DNA damage by p53 class mediator	BP	1529	1017	253	7	146
45931	GO:1900087	positive regulation of G1/S transition of mitotic cell cycle	BP	1529	1017	253	7	146
45931	GO:1902806	regulation of cell cycle G1/S phase transition	BP	1529	1017	253	7	146
45931	GO:2000045	regulation of G1/S transition of mitotic cell cycle	BP	1529	1017	253	7	146
45931	GO:2000134	negative regulation of G1/S transition of mitotic cell cycle	BP	1529	1017	253	7	146
45944	GO:0045944	positive regulation of transcription by RNA polymerase II	BP	1529	1017	253	3	146
45944	GO:0031328	positive regulation of cellular biosynthetic process	BP	1529	1017	253	3	146
45944	GO:0045893	positive regulation of DNA-templated transcription	BP	1529	1017	253	3	146
46326	GO:0046326	positive regulation of glucose import	BP	1529	1017	253	4	146
46326	GO:0010828	positive regulation of glucose transmembrane transport	BP	1529	1017	253	4	146
46326	GO:0010829	negative regulation of glucose transmembrane transport	BP	1529	1017	253	4	146
46326	GO:0046325	negative regulation of glucose import	BP	1529	1017	253	4	146
46427	GO:0046427	positive regulation of receptor signaling pathway via JAK-STAT	BP	1529	1017	253	4	146
46427	GO:0042976	activation of Janus kinase activity	BP	1529	1017	253	4	146
46427	GO:0046425	regulation of receptor signaling pathway via JAK-STAT	BP	1529	1017	253	4	146
46427	GO:1904893	negative regulation of receptor signaling pathway via STAT	BP	1529	1017	253	4	146
46598	GO:0046598	positive regulation of viral entry into host cell	BP	1529	1017	253	4	146
46598	GO:0045069	regulation of viral genome replication	BP	1529	1017	253	4	146
46598	GO:0045070	positive regulation of viral genome replication	BP	1529	1017	253	4	146
46598	GO:2000535	regulation of entry of bacterium into host cell	BP	1529	1017	253	4	146
46627	GO:0046627	negative regulation of insulin receptor signaling pathway	BP	1529	1017	253	3	146
46627	GO:0046628	positive regulation of insulin receptor signaling pathway	BP	1529	1017	253	3	146
46627	GO:1900077	negative regulation of cellular response to insulin stimulus	BP	1529	1017	253	3	146
46697	GO:0046697	decidualization	BP	1529	1017	253	6	146
46697	GO:0001892	embryonic placenta development	BP	1529	1017	253	6	146
46697	GO:0007565	female pregnancy	BP	1529	1017	253	6	146
46697	GO:0007566	embryo implantation	BP	1529	1017	253	6	146
46697	GO:0060674	placenta blood vessel development	BP	1529	1017	253	6	146
46697	GO:0060711	labyrinthine layer development	BP	1529	1017	253	6	146
46889	GO:0046889	positive regulation of lipid biosynthetic process	BP	1529	1017	253	18	146
46889	GO:0010866	regulation of triglyceride biosynthetic process	BP	1529	1017	253	18	146
46889	GO:0031392	regulation of prostaglandin biosynthetic process	BP	1529	1017	253	18	146
46889	GO:0031394	positive regulation of prostaglandin biosynthetic process	BP	1529	1017	253	18	146
46889	GO:0032000	positive regulation of fatty acid beta-oxidation	BP	1529	1017	253	18	146
46889	GO:0042304	regulation of fatty acid biosynthetic process	BP	1529	1017	253	18	146
46889	GO:0043551	regulation of phosphatidylinositol 3-kinase activity	BP	1529	1017	253	18	146
46889	GO:0043552	positive regulation of phosphatidylinositol 3-kinase activity	BP	1529	1017	253	18	146
46889	GO:0045541	negative regulation of cholesterol biosynthetic process	BP	1529	1017	253	18	146
46889	GO:0045717	negative regulation of fatty acid biosynthetic process	BP	1529	1017	253	18	146
46889	GO:0045922	negative regulation of fatty acid metabolic process	BP	1529	1017	253	18	146
46889	GO:0046321	positive regulation of fatty acid oxidation	BP	1529	1017	253	18	146
46889	GO:0046890	regulation of lipid biosynthetic process	BP	1529	1017	253	18	146
46889	GO:0050810	regulation of steroid biosynthetic process	BP	1529	1017	253	18	146
46889	GO:0050995	negative regulation of lipid catabolic process	BP	1529	1017	253	18	146
46889	GO:0051055	negative regulation of lipid biosynthetic process	BP	1529	1017	253	18	146
46889	GO:0070857	regulation of bile acid biosynthetic process	BP	1529	1017	253	18	146
46889	GO:0090205	positive regulation of cholesterol metabolic process	BP	1529	1017	253	18	146
48538	GO:0048538	thymus development	BP	1529	1017	253	4	146
48538	GO:0002562	somatic diversification of immune receptors via germline recombination within a single locus	BP	1529	1017	253	4	146
48538	GO:0033152	immunoglobulin V(D)J recombination	BP	1529	1017	253	4	146
48538	GO:0048535	lymph node development	BP	1529	1017	253	4	146
48661	GO:0048661	positive regulation of smooth muscle cell proliferation	BP	1529	1017	253	3	146
48661	GO:0048662	negative regulation of smooth muscle cell proliferation	BP	1529	1017	253	3	146
48661	GO:1904707	positive regulation of vascular associated smooth muscle cell proliferation	BP	1529	1017	253	3	146
48679	GO:0048679	regulation of axon regeneration	BP	1529	1017	253	6	146
48679	GO:0030193	regulation of blood coagulation	BP	1529	1017	253	6	146
48679	GO:0051918	negative regulation of fibrinolysis	BP	1529	1017	253	6	146
48679	GO:0061045	negative regulation of wound healing	BP	1529	1017	253	6	146
48679	GO:0070572	positive regulation of neuron projection regeneration	BP	1529	1017	253	6	146
48679	GO:0090303	positive regulation of wound healing	BP	1529	1017	253	6	146
48714	GO:0048714	positive regulation of oligodendrocyte differentiation	BP	1529	1017	253	7	146
48714	GO:0010626	negative regulation of Schwann cell proliferation	BP	1529	1017	253	7	146
48714	GO:0045686	negative regulation of glial cell differentiation	BP	1529	1017	253	7	146
48714	GO:0048711	positive regulation of astrocyte differentiation	BP	1529	1017	253	7	146
48714	GO:0060252	positive regulation of glial cell proliferation	BP	1529	1017	253	7	146
48714	GO:0060253	negative regulation of glial cell proliferation	BP	1529	1017	253	7	146
48714	GO:0061888	regulation of astrocyte activation	BP	1529	1017	253	7	146
48873	GO:0048873	homeostasis of number of cells within a tissue	BP	1529	1017	253	3	146
48873	GO:0001894	tissue homeostasis	BP	1529	1017	253	3	146
48873	GO:0035633	maintenance of blood-brain barrier	BP	1529	1017	253	3	146
50729	GO:0050729	positive regulation of inflammatory response	BP	1529	1017	253	8	146
50729	GO:0002218	activation of innate immune response	BP	1529	1017	253	8	146
50729	GO:0002221	pattern recognition receptor signaling pathway	BP	1529	1017	253	8	146
50729	GO:0045088	regulation of innate immune response	BP	1529	1017	253	8	146
50729	GO:0045824	negative regulation of innate immune response	BP	1529	1017	253	8	146
50729	GO:0050727	regulation of inflammatory response	BP	1529	1017	253	8	146
50729	GO:0050728	negative regulation of inflammatory response	BP	1529	1017	253	8	146
50729	GO:0050778	positive regulation of immune response	BP	1529	1017	253	8	146
50731	GO:0050731	positive regulation of peptidyl-tyrosine phosphorylation	BP	1529	1017	253	5	146
50731	GO:0042531	positive regulation of tyrosine phosphorylation of STAT protein	BP	1529	1017	253	5	146
50731	GO:0042532	negative regulation of tyrosine phosphorylation of STAT protein	BP	1529	1017	253	5	146
50731	GO:0061097	regulation of protein tyrosine kinase activity	BP	1529	1017	253	5	146
50731	GO:0061098	positive regulation of protein tyrosine kinase activity	BP	1529	1017	253	5	146
50766	GO:0050766	positive regulation of phagocytosis	BP	1529	1017	253	3	146
50766	GO:0050765	negative regulation of phagocytosis	BP	1529	1017	253	3	146
50766	GO:0060100	positive regulation of phagocytosis, engulfment	BP	1529	1017	253	3	146
50847	GO:0050847	progesterone receptor signaling pathway	BP	1529	1017	253	3	146
50847	GO:0030521	androgen receptor signaling pathway	BP	1529	1017	253	3	146
50847	GO:0042921	glucocorticoid receptor signaling pathway	BP	1529	1017	253	3	146
51000	GO:0051000	positive regulation of nitric-oxide synthase activity	BP	1529	1017	253	6	146
51000	GO:0032770	positive regulation of monooxygenase activity	BP	1529	1017	253	6	146
51000	GO:0033864	positive regulation of NAD(P)H oxidase activity	BP	1529	1017	253	6	146
51000	GO:0050999	regulation of nitric-oxide synthase activity	BP	1529	1017	253	6	146
51000	GO:0051354	negative regulation of oxidoreductase activity	BP	1529	1017	253	6	146
51000	GO:0060558	regulation of calcidiol 1-monooxygenase activity	BP	1529	1017	253	6	146
51048	GO:0051048	negative regulation of secretion	BP	1529	1017	253	3	146
51048	GO:0034763	negative regulation of transmembrane transport	BP	1529	1017	253	3	146
51048	GO:0046883	regulation of hormone secretion	BP	1529	1017	253	3	146
51054	GO:0051054	positive regulation of DNA metabolic process	BP	1529	1017	253	7	146
51054	GO:0032204	regulation of telomere maintenance	BP	1529	1017	253	7	146
51054	GO:0032211	negative regulation of telomere maintenance via telomerase	BP	1529	1017	253	7	146
51054	GO:0032212	positive regulation of telomere maintenance via telomerase	BP	1529	1017	253	7	146
51054	GO:0051972	regulation of telomerase activity	BP	1529	1017	253	7	146
51054	GO:0051973	positive regulation of telomerase activity	BP	1529	1017	253	7	146
51054	GO:2000573	positive regulation of DNA biosynthetic process	BP	1529	1017	253	7	146
51092	GO:0051092	positive regulation of NF-kappaB transcription factor activity	BP	1529	1017	253	4	146
51092	GO:0032088	negative regulation of NF-kappaB transcription factor activity	BP	1529	1017	253	4	146
51092	GO:0043433	negative regulation of DNA-binding transcription factor activity	BP	1529	1017	253	4	146
51092	GO:0051091	positive regulation of DNA-binding transcription factor activity	BP	1529	1017	253	4	146
51348	GO:0051348	negative regulation of transferase activity	BP	1529	1017	253	3	146
51348	GO:0043086	negative regulation of catalytic activity	BP	1529	1017	253	3	146
51348	GO:0051346	negative regulation of hydrolase activity	BP	1529	1017	253	3	146
51592	GO:0051592	response to calcium ion	BP	1529	1017	253	3	146
51592	GO:0046688	response to copper ion	BP	1529	1017	253	3	146
51592	GO:0071248	cellular response to metal ion	BP	1529	1017	253	3	146
51924	GO:0051924	regulation of calcium ion transport	BP	1529	1017	253	9	146
51924	GO:0043267	negative regulation of potassium ion transport	BP	1529	1017	253	9	146
51924	GO:0051279	regulation of release of sequestered calcium ion into cytosol	BP	1529	1017	253	9	146
51924	GO:0051283	negative regulation of sequestering of calcium ion	BP	1529	1017	253	9	146
51924	GO:0051926	negative regulation of calcium ion transport	BP	1529	1017	253	9	146
51924	GO:0051928	positive regulation of calcium ion transport	BP	1529	1017	253	9	146
51924	GO:1903169	regulation of calcium ion transmembrane transport	BP	1529	1017	253	9	146
51924	GO:1903792	negative regulation of anion transport	BP	1529	1017	253	9	146
51924	GO:1904064	positive regulation of cation transmembrane transport	BP	1529	1017	253	9	146
55001	GO:0055001	muscle cell development	BP	1529	1017	253	5	146
55001	GO:0007517	muscle organ development	BP	1529	1017	253	5	146
55001	GO:0007519	skeletal muscle tissue development	BP	1529	1017	253	5	146
55001	GO:0051145	smooth muscle cell differentiation	BP	1529	1017	253	5	146
55001	GO:0051146	striated muscle cell differentiation	BP	1529	1017	253	5	146
55006	GO:0055006	cardiac cell development	BP	1529	1017	253	9	146
55006	GO:0048625	myoblast fate commitment	BP	1529	1017	253	9	146
55006	GO:0055007	cardiac muscle cell differentiation	BP	1529	1017	253	9	146
55006	GO:0055012	ventricular cardiac muscle cell differentiation	BP	1529	1017	253	9	146
55006	GO:0060379	cardiac muscle cell myoblast differentiation	BP	1529	1017	253	9	146
55006	GO:0060911	cardiac cell fate commitment	BP	1529	1017	253	9	146
55006	GO:0060956	endocardial cell differentiation	BP	1529	1017	253	9	146
55006	GO:0061028	establishment of endothelial barrier	BP	1529	1017	253	9	146
55006	GO:0061308	cardiac neural crest cell development involved in heart development	BP	1529	1017	253	9	146
55074	GO:0055074	calcium ion homeostasis	BP	1529	1017	253	4	146
55074	GO:0030003	cellular cation homeostasis	BP	1529	1017	253	4	146
55074	GO:0032469	endoplasmic reticulum calcium ion homeostasis	BP	1529	1017	253	4	146
55074	GO:0055076	transition metal ion homeostasis	BP	1529	1017	253	4	146
55089	GO:0055089	fatty acid homeostasis	BP	1529	1017	253	4	146
55089	GO:0035356	cellular triglyceride homeostasis	BP	1529	1017	253	4	146
55089	GO:0042632	cholesterol homeostasis	BP	1529	1017	253	4	146
55089	GO:0070328	triglyceride homeostasis	BP	1529	1017	253	4	146
60068	GO:0060068	vagina development	BP	1529	1017	253	8	146
60068	GO:0001541	ovarian follicle development	BP	1529	1017	253	8	146
60068	GO:0001542	ovulation from ovarian follicle	BP	1529	1017	253	8	146
60068	GO:0001554	luteolysis	BP	1529	1017	253	8	146
60068	GO:0008584	male gonad development	BP	1529	1017	253	8	146
60068	GO:0035112	genitalia morphogenesis	BP	1529	1017	253	8	146
60068	GO:0048608	reproductive structure development	BP	1529	1017	253	8	146
60068	GO:0060008	Sertoli cell differentiation	BP	1529	1017	253	8	146
60268	GO:0060268	negative regulation of respiratory burst	BP	1529	1017	253	3	146
60268	GO:0060264	regulation of respiratory burst involved in inflammatory response	BP	1529	1017	253	3	146
60268	GO:0060267	positive regulation of respiratory burst	BP	1529	1017	253	3	146
60440	GO:0060440	trachea formation	BP	1529	1017	253	6	146
60440	GO:0030324	lung development	BP	1529	1017	253	6	146
60440	GO:0060425	lung morphogenesis	BP	1529	1017	253	6	146
60440	GO:0060441	epithelial tube branching involved in lung morphogenesis	BP	1529	1017	253	6	146
60440	GO:0060487	lung epithelial cell differentiation	BP	1529	1017	253	6	146
60440	GO:0060914	heart formation	BP	1529	1017	253	6	146
60612	GO:0060612	adipose tissue development	BP	1529	1017	253	3	146
60612	GO:0002062	chondrocyte differentiation	BP	1529	1017	253	3	146
60612	GO:0060351	cartilage development involved in endochondral bone morphogenesis	BP	1529	1017	253	3	146
60742	GO:0060742	epithelial cell differentiation involved in prostate gland development	BP	1529	1017	253	4	146
60742	GO:0060525	prostate glandular acinus development	BP	1529	1017	253	4	146
60742	GO:0060736	prostate gland growth	BP	1529	1017	253	4	146
60742	GO:0060740	prostate gland epithelium morphogenesis	BP	1529	1017	253	4	146
60749	GO:0060749	mammary gland alveolus development	BP	1529	1017	253	3	146
60749	GO:0007595	lactation	BP	1529	1017	253	3	146
60749	GO:0033598	mammary gland epithelial cell proliferation	BP	1529	1017	253	3	146
60907	GO:0060907	positive regulation of macrophage cytokine production	BP	1529	1017	253	7	146
60907	GO:0002637	regulation of immunoglobulin production	BP	1529	1017	253	7	146
60907	GO:0002639	positive regulation of immunoglobulin production	BP	1529	1017	253	7	146
60907	GO:0002719	negative regulation of cytokine production involved in immune response	BP	1529	1017	253	7	146
60907	GO:0002720	positive regulation of cytokine production involved in immune response	BP	1529	1017	253	7	146
60907	GO:0002730	regulation of dendritic cell cytokine production	BP	1529	1017	253	7	146
60907	GO:0002735	positive regulation of myeloid dendritic cell cytokine production	BP	1529	1017	253	7	146
60982	GO:0060982	coronary artery morphogenesis	BP	1529	1017	253	3	146
60982	GO:0035909	aorta morphogenesis	BP	1529	1017	253	3	146
60982	GO:0060978	angiogenesis involved in coronary vascular morphogenesis	BP	1529	1017	253	3	146
61518	GO:0061518	microglial cell proliferation	BP	1529	1017	253	7	146
61518	GO:0002275	myeloid cell activation involved in immune response	BP	1529	1017	253	7	146
61518	GO:0002286	T cell activation involved in immune response	BP	1529	1017	253	7	146
61518	GO:0002312	B cell activation involved in immune response	BP	1529	1017	253	7	146
61518	GO:0042098	T cell proliferation	BP	1529	1017	253	7	146
61518	GO:0045063	T-helper 1 cell differentiation	BP	1529	1017	253	7	146
61518	GO:0072539	T-helper 17 cell differentiation	BP	1529	1017	253	7	146
61900	GO:0061900	glial cell activation	BP	1529	1017	253	3	146
61900	GO:0001774	microglial cell activation	BP	1529	1017	253	3	146
61900	GO:0048143	astrocyte activation	BP	1529	1017	253	3	146
62100	GO:0062100	positive regulation of programmed necrotic cell death	BP	1529	1017	253	3	146
62100	GO:0060544	regulation of necroptotic process	BP	1529	1017	253	3	146
62100	GO:0060546	negative regulation of necroptotic process	BP	1529	1017	253	3	146
6635	GO:0006635	fatty acid beta-oxidation	BP	1529	1017	253	6	146
6635	GO:0006633	fatty acid biosynthetic process	BP	1529	1017	253	6	146
6635	GO:0019371	cyclooxygenase pathway	BP	1529	1017	253	6	146
6635	GO:0019626	short-chain fatty acid catabolic process	BP	1529	1017	253	6	146
6635	GO:0034440	lipid oxidation	BP	1529	1017	253	6	146
6635	GO:0046456	icosanoid biosynthetic process	BP	1529	1017	253	6	146
6919	GO:0006919	activation of cysteine-type endopeptidase activity involved in apoptotic process	BP	1529	1017	253	12	146
6919	GO:0008635	activation of cysteine-type endopeptidase activity involved in apoptotic process by cytochrome c	BP	1529	1017	253	12	146
6919	GO:0010466	negative regulation of peptidase activity	BP	1529	1017	253	12	146
6919	GO:0010952	positive regulation of peptidase activity	BP	1529	1017	253	12	146
6919	GO:0032436	positive regulation of proteasomal ubiquitin-dependent protein catabolic process	BP	1529	1017	253	12	146
6919	GO:0043154	negative regulation of cysteine-type endopeptidase activity involved in apoptotic process	BP	1529	1017	253	12	146
6919	GO:0043280	positive regulation of cysteine-type endopeptidase activity involved in apoptotic process	BP	1529	1017	253	12	146
6919	GO:0052548	regulation of endopeptidase activity	BP	1529	1017	253	12	146
6919	GO:0097202	activation of cysteine-type endopeptidase activity	BP	1529	1017	253	12	146
6919	GO:2000059	negative regulation of ubiquitin-dependent protein catabolic process	BP	1529	1017	253	12	146
6919	GO:2000060	positive regulation of ubiquitin-dependent protein catabolic process	BP	1529	1017	253	12	146
6919	GO:2001269	positive regulation of cysteine-type endopeptidase activity involved in apoptotic signaling pathway	BP	1529	1017	253	12	146
70059	GO:0070059	intrinsic apoptotic signaling pathway in response to endoplasmic reticulum stress	BP	1529	1017	253	4	146
70059	GO:0008630	intrinsic apoptotic signaling pathway in response to DNA damage	BP	1529	1017	253	4	146
70059	GO:0008631	intrinsic apoptotic signaling pathway in response to oxidative stress	BP	1529	1017	253	4	146
70059	GO:0097191	extrinsic apoptotic signaling pathway	BP	1529	1017	253	4	146
70168	GO:0070168	negative regulation of biomineral tissue development	BP	1529	1017	253	3	146
70168	GO:0030501	positive regulation of bone mineralization	BP	1529	1017	253	3	146
70168	GO:0070169	positive regulation of biomineral tissue development	BP	1529	1017	253	3	146
70371	GO:0070371	ERK1 and ERK2 cascade	BP	1529	1017	253	4	146
70371	GO:0007254	JNK cascade	BP	1529	1017	253	4	146
70371	GO:0038066	p38MAPK cascade	BP	1529	1017	253	4	146
70371	GO:0051403	stress-activated MAPK cascade	BP	1529	1017	253	4	146
70374	GO:0070374	positive regulation of ERK1 and ERK2 cascade	BP	1529	1017	253	18	146
70374	GO:0001934	positive regulation of protein phosphorylation	BP	1529	1017	253	18	146
70374	GO:0032147	activation of protein kinase activity	BP	1529	1017	253	18	146
70374	GO:0032872	regulation of stress-activated MAPK cascade	BP	1529	1017	253	18	146
70374	GO:0033674	positive regulation of kinase activity	BP	1529	1017	253	18	146
70374	GO:0043405	regulation of MAP kinase activity	BP	1529	1017	253	18	146
70374	GO:0043406	positive regulation of MAP kinase activity	BP	1529	1017	253	18	146
70374	GO:0043410	positive regulation of MAPK cascade	BP	1529	1017	253	18	146
70374	GO:0043507	positive regulation of JUN kinase activity	BP	1529	1017	253	18	146
70374	GO:0043549	regulation of kinase activity	BP	1529	1017	253	18	146
70374	GO:0045860	positive regulation of protein kinase activity	BP	1529	1017	253	18	146
70374	GO:0045937	positive regulation of phosphate metabolic process	BP	1529	1017	253	18	146
70374	GO:0046329	negative regulation of JNK cascade	BP	1529	1017	253	18	146
70374	GO:0046330	positive regulation of JNK cascade	BP	1529	1017	253	18	146
70374	GO:0070372	regulation of ERK1 and ERK2 cascade	BP	1529	1017	253	18	146
70374	GO:0070373	negative regulation of ERK1 and ERK2 cascade	BP	1529	1017	253	18	146
70374	GO:0071902	positive regulation of protein serine/threonine kinase activity	BP	1529	1017	253	18	146
70374	GO:1900745	positive regulation of p38MAPK cascade	BP	1529	1017	253	18	146
70932	GO:0070932	histone H3 deacetylation	BP	1529	1017	253	4	146
70932	GO:0016575	histone deacetylation	BP	1529	1017	253	4	146
70932	GO:0034983	peptidyl-lysine deacetylation	BP	1529	1017	253	4	146
70932	GO:0070933	histone H4 deacetylation	BP	1529	1017	253	4	146
71222	GO:0071222	cellular response to lipopolysaccharide	BP	1529	1017	253	9	146
71222	GO:0031663	lipopolysaccharide-mediated signaling pathway	BP	1529	1017	253	9	146
71222	GO:0032496	response to lipopolysaccharide	BP	1529	1017	253	9	146
71222	GO:0042742	defense response to bacterium	BP	1529	1017	253	9	146
71222	GO:0045087	innate immune response	BP	1529	1017	253	9	146
71222	GO:0071221	cellular response to bacterial lipopeptide	BP	1529	1017	253	9	146
71222	GO:0071223	cellular response to lipoteichoic acid	BP	1529	1017	253	9	146
71222	GO:0071224	cellular response to peptidoglycan	BP	1529	1017	253	9	146
71222	GO:0071396	cellular response to lipid	BP	1529	1017	253	9	146
71230	GO:0071230	cellular response to amino acid stimulus	BP	1529	1017	253	3	146
71230	GO:0043200	response to amino acid	BP	1529	1017	253	3	146
71230	GO:0071233	cellular response to leucine	BP	1529	1017	253	3	146
71260	GO:0071260	cellular response to mechanical stimulus	BP	1529	1017	253	12	146
71260	GO:0009267	cellular response to starvation	BP	1529	1017	253	12	146
71260	GO:0009411	response to UV	BP	1529	1017	253	12	146
71260	GO:0031667	response to nutrient levels	BP	1529	1017	253	12	146
71260	GO:0031670	cellular response to nutrient	BP	1529	1017	253	12	146
71260	GO:0034198	cellular response to amino acid starvation	BP	1529	1017	253	12	146
71260	GO:0034644	cellular response to UV	BP	1529	1017	253	12	146
71260	GO:0035994	response to muscle stretch	BP	1529	1017	253	12	146
71260	GO:0042149	cellular response to glucose starvation	BP	1529	1017	253	12	146
71260	GO:0042594	response to starvation	BP	1529	1017	253	12	146
71260	GO:0070141	response to UV-A	BP	1529	1017	253	12	146
71260	GO:1990253	cellular response to leucine starvation	BP	1529	1017	253	12	146
71356	GO:0071356	cellular response to tumor necrosis factor	BP	1529	1017	253	3	146
71356	GO:0019221	cytokine-mediated signaling pathway	BP	1529	1017	253	3	146
71356	GO:0033209	tumor necrosis factor-mediated signaling pathway	BP	1529	1017	253	3	146
7173	GO:0007173	epidermal growth factor receptor signaling pathway	BP	1529	1017	253	4	146
7173	GO:0038129	ERBB3 signaling pathway	BP	1529	1017	253	4	146
7173	GO:0038130	ERBB4 signaling pathway	BP	1529	1017	253	4	146
7173	GO:0038134	ERBB2-EGFR signaling pathway	BP	1529	1017	253	4	146
7179	GO:0007179	transforming growth factor beta receptor signaling pathway	BP	1529	1017	253	6	146
7179	GO:0007169	transmembrane receptor protein tyrosine kinase signaling pathway	BP	1529	1017	253	6	146
7179	GO:0030509	BMP signaling pathway	BP	1529	1017	253	6	146
7179	GO:0032924	activin receptor signaling pathway	BP	1529	1017	253	6	146
7179	GO:0060395	SMAD protein signal transduction	BP	1529	1017	253	6	146
7179	GO:0071363	cellular response to growth factor stimulus	BP	1529	1017	253	6	146
72203	GO:0072203	cell proliferation involved in metanephros development	BP	1529	1017	253	3	146
72203	GO:0072075	metanephric mesenchyme development	BP	1529	1017	253	3	146
72203	GO:0072110	glomerular mesangial cell proliferation	BP	1529	1017	253	3	146
7253	GO:0007253	cytoplasmic sequestering of NF-kappaB	BP	1529	1017	253	3	146
7253	GO:0032507	maintenance of protein location in cell	BP	1529	1017	253	3	146
7253	GO:0042994	cytoplasmic sequestering of transcription factor	BP	1529	1017	253	3	146
7420	GO:0007420	brain development	BP	1529	1017	253	3	146
7420	GO:0021543	pallium development	BP	1529	1017	253	3	146
7420	GO:0030900	forebrain development	BP	1529	1017	253	3	146
8203	GO:0008203	cholesterol metabolic process	BP	1529	1017	253	3	146
8203	GO:0006695	cholesterol biosynthetic process	BP	1529	1017	253	3	146
8203	GO:0046165	alcohol biosynthetic process	BP	1529	1017	253	3	146
90090	GO:0090090	negative regulation of canonical Wnt signaling pathway	BP	1529	1017	253	3	146
90090	GO:0030177	positive regulation of Wnt signaling pathway	BP	1529	1017	253	3	146
90090	GO:0090263	positive regulation of canonical Wnt signaling pathway	BP	1529	1017	253	3	146
90118	GO:0090118	receptor-mediated endocytosis involved in cholesterol transport	BP	1529	1017	253	4	146
90118	GO:0030299	intestinal cholesterol absorption	BP	1529	1017	253	4	146
90118	GO:0043691	reverse cholesterol transport	BP	1529	1017	253	4	146
90118	GO:0070508	cholesterol import	BP	1529	1017	253	4	146
9205	GO:0009205	purine ribonucleoside triphosphate metabolic process	BP	1529	1017	253	4	146
9205	GO:0006163	purine nucleotide metabolic process	BP	1529	1017	253	4	146
9205	GO:0033875	ribonucleoside bisphosphate metabolic process	BP	1529	1017	253	4	146
9205	GO:0034032	purine nucleoside bisphosphate metabolic process	BP	1529	1017	253	4	146
9409	GO:0009409	response to cold	BP	1529	1017	253	3	146
9409	GO:0009408	response to heat	BP	1529	1017	253	3	146
9409	GO:0034605	cellular response to heat	BP	1529	1017	253	3	146
97192	GO:0097192	extrinsic apoptotic signaling pathway in absence of ligand	BP	1529	1017	253	3	146
97192	GO:0008625	extrinsic apoptotic signaling pathway via death domain receptors	BP	1529	1017	253	3	146
97192	GO:0036462	TRAIL-activated apoptotic signaling pathway	BP	1529	1017	253	3	146
9749	GO:0009749	response to glucose	BP	1529	1017	253	6	146
9749	GO:0009750	response to fructose	BP	1529	1017	253	6	146
9749	GO:0010255	glucose mediated signaling pathway	BP	1529	1017	253	6	146
9749	GO:0033591	response to L-ascorbic acid	BP	1529	1017	253	6	146
9749	GO:0071322	cellular response to carbohydrate stimulus	BP	1529	1017	253	6	146
9749	GO:0071333	cellular response to glucose stimulus	BP	1529	1017	253	6	146

## Sheet: MONET TopGO-Revigo annotation
Representative	TermID	Name	GO_group	size_go_terms	go_terms_in_cluster	num_clusters	Num_Go_terms_per_cluster	clusters_big_eq_3_GO_terms	group
32543	GO:0032543	mitochondrial translation	BP	34	17	5	6	2	574
32543	GO:0000455	enzyme-directed rRNA pseudouridine synthesis	BP	34	17	5	6	2	574
32543	GO:0030488	tRNA methylation	BP	34	17	5	6	2	574
32543	GO:0031167	rRNA methylation	BP	34	17	5	6	2	574
32543	GO:0070900	mitochondrial tRNA modification	BP	34	17	5	6	2	574
32543	GO:1990481	mRNA pseudouridine synthesis	BP	34	17	5	6	2	574
43039	GO:0043039	tRNA aminoacylation	BP	34	17	5	5	2	574
43039	GO:0006418	tRNA aminoacylation for protein translation	BP	34	17	5	5	2	574
43039	GO:0009063	amino acid catabolic process	BP	34	17	5	5	2	574
43039	GO:0009084	glutamine family amino acid biosynthetic process	BP	34	17	5	5	2	574
43039	GO:1901606	alpha-amino acid catabolic process	BP	34	17	5	5	2	574
46321	GO:0046321	positive regulation of fatty acid oxidation	BP	90	19	9	3	1	1194
46321	GO:0045723	positive regulation of fatty acid biosynthetic process	BP	90	19	9	3	1	1194
46321	GO:0046889	positive regulation of lipid biosynthetic process	BP	90	19	9	3	1	1194
16242	GO:0016242	negative regulation of macroautophagy	BP	181	57	26	3	4	1237
16242	GO:1902902	negative regulation of autophagosome assembly	BP	181	57	26	3	4	1237
16242	GO:2000786	positive regulation of autophagosome assembly	BP	181	57	26	3	4	1237
1900745	GO:1900745	positive regulation of p38MAPK cascade	BP	181	57	26	3	4	1237
1900745	GO:0046329	negative regulation of JNK cascade	BP	181	57	26	3	4	1237
1900745	GO:0046330	positive regulation of JNK cascade	BP	181	57	26	3	4	1237
34142	GO:0034142	toll-like receptor 4 signaling pathway	BP	181	57	26	4	4	1237
34142	GO:0002223	stimulatory C-type lectin receptor signaling pathway	BP	181	57	26	4	4	1237
34142	GO:0002755	MyD88-dependent toll-like receptor signaling pathway	BP	181	57	26	4	4	1237
34142	GO:0034134	toll-like receptor 2 signaling pathway	BP	181	57	26	4	4	1237
46929	GO:0046929	negative regulation of neurotransmitter secretion	BP	181	57	26	3	4	1237
46929	GO:0051580	regulation of neurotransmitter uptake	BP	181	57	26	3	4	1237
46929	GO:0051590	positive regulation of neurotransmitter transport	BP	181	57	26	3	4	1237
10896	GO:0010896	regulation of triglyceride catabolic process	BP	36	12	5	3	2	1315
10896	GO:0050995	negative regulation of lipid catabolic process	BP	36	12	5	3	2	1315
10896	GO:0090208	positive regulation of triglyceride metabolic process	BP	36	12	5	3	2	1315
6958	GO:0006958	complement activation, classical pathway	BP	36	12	5	3	2	1315
6958	GO:0006957	complement activation, alternative pathway	BP	36	12	5	3	2	1315
6958	GO:0019731	antibacterial humoral response	BP	36	12	5	3	2	1315
2674	GO:0002674	negative regulation of acute inflammatory response	BP	96	38	15	3	5	1316
2674	GO:0002862	negative regulation of inflammatory response to antigenic stimulus	BP	96	38	15	3	5	1316
2674	GO:0002864	regulation of acute inflammatory response to antigenic stimulus	BP	96	38	15	3	5	1316
44597	GO:0044597	daunorubicin metabolic process	BP	96	38	15	3	5	1316
44597	GO:0042448	progesterone metabolic process	BP	96	38	15	3	5	1316
44597	GO:0044598	doxorubicin metabolic process	BP	96	38	15	3	5	1316
46887	GO:0046887	positive regulation of hormone secretion	BP	96	38	15	3	5	1316
46887	GO:0042445	hormone metabolic process	BP	96	38	15	3	5	1316
46887	GO:0050714	positive regulation of protein secretion	BP	96	38	15	3	5	1316
7596	GO:0007596	blood coagulation	BP	96	38	15	3	5	1316
7596	GO:0030193	regulation of blood coagulation	BP	96	38	15	3	5	1316
7596	GO:0051917	regulation of fibrinolysis	BP	96	38	15	3	5	1316
97267	GO:0097267	omega-hydroxylase P450 pathway	BP	96	38	15	6	5	1316
97267	GO:0001516	prostaglandin biosynthetic process	BP	96	38	15	6	5	1316
97267	GO:0006693	prostaglandin metabolic process	BP	96	38	15	6	5	1316
97267	GO:0019373	epoxygenase P450 pathway	BP	96	38	15	6	5	1316
97267	GO:0042759	long-chain fatty acid biosynthetic process	BP	96	38	15	6	5	1316
97267	GO:0046456	icosanoid biosynthetic process	BP	96	38	15	6	5	1316
2000045	GO:2000045	regulation of G1/S transition of mitotic cell cycle	BP	142	53	20	3	9	1330
2000045	GO:1901992	positive regulation of mitotic cell cycle phase transition	BP	142	53	20	3	9	1330
2000045	GO:2000134	negative regulation of G1/S transition of mitotic cell cycle	BP	142	53	20	3	9	1330
34983	GO:0034983	peptidyl-lysine deacetylation	BP	142	53	20	3	9	1330
34983	GO:0016575	histone deacetylation	BP	142	53	20	3	9	1330
34983	GO:0070932	histone H3 deacetylation	BP	142	53	20	3	9	1330
43984	GO:0043984	histone H4-K16 acetylation	BP	142	53	20	3	9	1330
43984	GO:0043966	histone H3 acetylation	BP	142	53	20	3	9	1330
43984	GO:0043968	histone H2A acetylation	BP	142	53	20	3	9	1330
51123	GO:0051123	RNA polymerase II preinitiation complex assembly	BP	142	53	20	6	9	1330
51123	GO:0006334	nucleosome assembly	BP	142	53	20	6	9	1330
51123	GO:0006361	transcription initiation at RNA polymerase I promoter	BP	142	53	20	6	9	1330
51123	GO:0006367	transcription initiation at RNA polymerase II promoter	BP	142	53	20	6	9	1330
51123	GO:0006384	transcription initiation at RNA polymerase III promoter	BP	142	53	20	6	9	1330
51123	GO:0070897	transcription preinitiation complex assembly	BP	142	53	20	6	9	1330
51153	GO:0051153	regulation of striated muscle cell differentiation	BP	142	53	20	3	9	1330
51153	GO:0051149	positive regulation of muscle cell differentiation	BP	142	53	20	3	9	1330
51153	GO:0051150	regulation of smooth muscle cell differentiation	BP	142	53	20	3	9	1330
6282	GO:0006282	regulation of DNA repair	BP	142	53	20	4	9	1330
6282	GO:0045739	positive regulation of DNA repair	BP	142	53	20	4	9	1330
6282	GO:0051053	negative regulation of DNA metabolic process	BP	142	53	20	4	9	1330
6282	GO:1905168	positive regulation of double-strand break repair via homologous recombination	BP	142	53	20	4	9	1330
71440	GO:0071440	regulation of histone H3-K14 acetylation	BP	142	53	20	3	9	1330
71440	GO:0035065	regulation of histone acetylation	BP	142	53	20	3	9	1330
71440	GO:1901985	positive regulation of protein acetylation	BP	142	53	20	3	9	1330
71901	GO:0071901	negative regulation of protein serine/threonine kinase activity	BP	142	53	20	3	9	1330
71901	GO:0000079	regulation of cyclin-dependent protein serine/threonine kinase activity	BP	142	53	20	3	9	1330
71901	GO:0045737	positive regulation of cyclin-dependent protein serine/threonine kinase activity	BP	142	53	20	3	9	1330
90043	GO:0090043	regulation of tubulin deacetylation	BP	142	53	20	3	9	1330
90043	GO:0031063	regulation of histone deacetylation	BP	142	53	20	3	9	1330
90043	GO:0031065	positive regulation of histone deacetylation	BP	142	53	20	3	23	1330

## Sheet: IPATH TopGO-Revigo annotation
Representative	TermID	Name	GO_group	size_go_terms	go_terms_in_cluster	num_clusters	Num_Go_terms_per_cluster	clusters_big_eq_3_GO_terms
14894	GO:0014894	response to denervation involved in regulation of muscle adaptation	BP	402	182	63	4	29
14894	GO:0010831	positive regulation of myotube differentiation	BP	402	182	63	4	29
14894	GO:0048742	regulation of skeletal muscle fiber development	BP	402	182	63	4	29
14894	GO:0061052	negative regulation of cell growth involved in cardiac muscle cell development	BP	402	182	63	4	29
150104	GO:0150104	transport across blood-brain barrier	BP	402	182	63	3	29
150104	GO:0042311	vasodilation	BP	402	182	63	3	29
150104	GO:1990962	xenobiotic transport across blood-brain barrier	BP	402	182	63	3	29
1558	GO:0001558	regulation of cell growth	BP	402	182	63	3	29
1558	GO:0030308	negative regulation of cell growth	BP	402	182	63	3	29
1558	GO:0048639	positive regulation of developmental growth	BP	402	182	63	3	29
16098	GO:0016098	monoterpenoid metabolic process	BP	402	182	63	4	29
16098	GO:0001523	retinoid metabolic process	BP	402	182	63	4	29
16098	GO:0042572	retinol metabolic process	BP	402	182	63	4	29
16098	GO:0042573	retinoic acid metabolic process	BP	402	182	63	4	29
1900369	GO:1900369	negative regulation of post-transcriptional gene silencing by RNA	BP	402	182	63	4	29
1900369	GO:0060965	negative regulation of miRNA-mediated gene silencing	BP	402	182	63	4	29
1900369	GO:1903799	negative regulation of miRNA maturation	BP	402	182	63	4	29
1900369	GO:1903800	positive regulation of miRNA maturation	BP	402	182	63	4	29
1902894	GO:1902894	negative regulation of miRNA transcription	BP	402	182	63	4	29
1902894	GO:1902895	positive regulation of miRNA transcription	BP	402	182	63	4	29
1902894	GO:2000629	negative regulation of miRNA metabolic process	BP	402	182	63	4	29
1902894	GO:2000630	positive regulation of miRNA metabolic process	BP	402	182	63	4	29
1904646	GO:1904646	cellular response to amyloid-beta	BP	402	182	63	4	29
1904646	GO:0032868	response to insulin	BP	402	182	63	4	29
1904646	GO:0032869	cellular response to insulin stimulus	BP	402	182	63	4	29
1904646	GO:0071375	cellular response to peptide hormone stimulus	BP	402	182	63	4	29
19228	GO:0019228	neuronal action potential	BP	402	182	63	7	29
19228	GO:0019227	neuronal action potential propagation	BP	402	182	63	7	29
19228	GO:0086002	cardiac muscle cell action potential involved in contraction	BP	402	182	63	7	29
19228	GO:0086005	ventricular cardiac muscle cell action potential	BP	402	182	63	7	29
19228	GO:0086010	membrane depolarization during action potential	BP	402	182	63	7	29
19228	GO:0086012	membrane depolarization during cardiac muscle cell action potential	BP	402	182	63	7	29
19228	GO:0086014	atrial cardiac muscle cell action potential	BP	402	182	63	7	29
19373	GO:0019373	epoxygenase P450 pathway	BP	402	182	63	3	29
19373	GO:0042759	long-chain fatty acid biosynthetic process	BP	402	182	63	3	29
19373	GO:0097267	omega-hydroxylase P450 pathway	BP	402	182	63	3	29
2000273	GO:2000273	positive regulation of signaling receptor activity	BP	402	182	63	4	29
2000273	GO:0007176	regulation of epidermal growth factor-activated receptor activity	BP	402	182	63	4	29
2000273	GO:0050731	positive regulation of peptidyl-tyrosine phosphorylation	BP	402	182	63	4	29
2000273	GO:2000272	negative regulation of signaling receptor activity	BP	402	182	63	4	29
30512	GO:0030512	negative regulation of transforming growth factor beta receptor signaling pathway	BP	402	182	63	3	29
30512	GO:0060392	negative regulation of SMAD protein signal transduction	BP	402	182	63	3	29
30512	GO:0060394	negative regulation of pathway-restricted SMAD protein phosphorylation	BP	402	182	63	3	29
32091	GO:0032091	negative regulation of protein binding	BP	402	182	63	3	29
32091	GO:0032092	positive regulation of protein binding	BP	402	182	63	3	29
32091	GO:0051099	positive regulation of binding	BP	402	182	63	3	29
34614	GO:0034614	cellular response to reactive oxygen species	BP	402	182	63	3	29
34614	GO:0034599	cellular response to oxidative stress	BP	402	182	63	3	29
34614	GO:0042542	response to hydrogen peroxide	BP	402	182	63	3	29
34765	GO:0034765	regulation of ion transmembrane transport	BP	402	182	63	5	29
34765	GO:0010959	regulation of metal ion transport	BP	402	182	63	5	29
34765	GO:0034764	positive regulation of transmembrane transport	BP	402	182	63	5	29
34765	GO:0044070	regulation of anion transport	BP	402	182	63	5	29
34765	GO:1904063	negative regulation of cation transmembrane transport	BP	402	182	63	5	29
43536	GO:0043536	positive regulation of blood vessel endothelial cell migration	BP	402	182	63	3	29
43536	GO:0043535	regulation of blood vessel endothelial cell migration	BP	402	182	63	3	29
43536	GO:2000147	positive regulation of cell motility	BP	402	182	63	3	29
45821	GO:0045821	positive regulation of glycolytic process	BP	402	182	63	7	29
45821	GO:0010677	negative regulation of cellular carbohydrate metabolic process	BP	402	182	63	7	29
45821	GO:0010906	regulation of glucose metabolic process	BP	402	182	63	7	29
45821	GO:0043456	regulation of pentose-phosphate shunt	BP	402	182	63	7	29
45821	GO:0045722	positive regulation of gluconeogenesis	BP	402	182	63	7	29
45821	GO:0045725	positive regulation of glycogen biosynthetic process	BP	402	182	63	7	29
45821	GO:0045820	negative regulation of glycolytic process	BP	402	182	63	7	29
45922	GO:0045922	negative regulation of fatty acid metabolic process	BP	402	182	63	6	29
45922	GO:0031998	regulation of fatty acid beta-oxidation	BP	402	182	63	6	29
45922	GO:0045939	negative regulation of steroid metabolic process	BP	402	182	63	6	29
45922	GO:0046321	positive regulation of fatty acid oxidation	BP	402	182	63	6	29
45922	GO:0051055	negative regulation of lipid biosynthetic process	BP	402	182	63	6	29
45922	GO:0090209	negative regulation of triglyceride metabolic process	BP	402	182	63	6	29
46889	GO:0046889	positive regulation of lipid biosynthetic process	BP	402	182	63	3	29
46889	GO:0045540	regulation of cholesterol biosynthetic process	BP	402	182	63	3	29
46889	GO:0090205	positive regulation of cholesterol metabolic process	BP	402	182	63	3	29
51222	GO:0051222	positive regulation of protein transport	BP	402	182	63	4	29
51222	GO:0042307	positive regulation of protein import into nucleus	BP	402	182	63	4	29
51222	GO:1903078	positive regulation of protein localization to plasma membrane	BP	402	182	63	4	29
51222	GO:1903829	positive regulation of protein localization	BP	402	182	63	4	29
51973	GO:0051973	positive regulation of telomerase activity	BP	402	182	63	3	29
51973	GO:0032212	positive regulation of telomere maintenance via telomerase	BP	402	182	63	3	29
51973	GO:0051974	negative regulation of telomerase activity	BP	402	182	63	3	29
52696	GO:0052696	flavonoid glucuronidation	BP	402	182	63	4	29
52696	GO:0051552	flavone metabolic process	BP	402	182	63	4	29
52696	GO:0052695	cellular glucuronidation	BP	402	182	63	4	29
52696	GO:0052697	xenobiotic glucuronidation	BP	402	182	63	4	29
70933	GO:0070933	histone H4 deacetylation	BP	402	182	63	4	29
70933	GO:0006476	protein deacetylation	BP	402	182	63	4	29
70933	GO:0034983	peptidyl-lysine deacetylation	BP	402	182	63	4	29
70933	GO:0070932	histone H3 deacetylation	BP	402	182	63	4	29
71380	GO:0071380	cellular response to prostaglandin E stimulus	BP	402	182	63	3	29
71380	GO:0045471	response to ethanol	BP	402	182	63	3	29
71380	GO:0071361	cellular response to ethanol	BP	402	182	63	3	29
71480	GO:0071480	cellular response to gamma radiation	BP	402	182	63	3	29
71480	GO:0010165	response to X-ray	BP	402	182	63	3	29
71480	GO:0034644	cellular response to UV	BP	402	182	63	3	29
71901	GO:0071901	negative regulation of protein serine/threonine kinase activity	BP	402	182	63	3	29
71901	GO:0043405	regulation of MAP kinase activity	BP	402	182	63	3	29
71901	GO:0071902	positive regulation of protein serine/threonine kinase activity	BP	402	182	63	3	29
72329	GO:0072329	monocarboxylic acid catabolic process	BP	402	182	63	3	29
72329	GO:0006631	fatty acid metabolic process	BP	402	182	63	3	29
72329	GO:0046395	carboxylic acid catabolic process	BP	402	182	63	3	29
8210	GO:0008210	estrogen metabolic process	BP	402	182	63	3	29
8210	GO:0008203	cholesterol metabolic process	BP	402	182	63	3	29
8210	GO:0008209	androgen metabolic process	BP	402	182	63	3	29
86091	GO:0086091	regulation of heart rate by cardiac conduction	BP	402	182	63	7	29
86091	GO:0045823	positive regulation of heart contraction	BP	402	182	63	7	29
86091	GO:0055117	regulation of cardiac muscle contraction	BP	402	182	63	7	29
86091	GO:0086015	SA node cell action potential	BP	402	182	63	7	29
86091	GO:0086016	AV node cell action potential	BP	402	182	63	7	29
86091	GO:0086029	Purkinje myocyte to ventricular cardiac muscle cell signaling	BP	402	182	63	7	29
86091	GO:0086043	bundle of His cell action potential	BP	402	182	63	7	29
9205	GO:0009205	purine ribonucleoside triphosphate metabolic process	BP	402	182	63	4	29
9205	GO:0006096	glycolytic process	BP	402	182	63	4	29
9205	GO:0033875	ribonucleoside bisphosphate metabolic process	BP	402	182	63	4	29
9205	GO:0034032	purine nucleoside bisphosphate metabolic process	BP	402	182	63	4	29

## Sheet: MSI TopGO-Revigo Annotation
Representative	TermID	Name	GO_group	size_go_terms	go_terms_in_cluster	num_clusters	Num_Go_Terms_per_cluster	clusters_big_eq_3_GO_terms
100012	GO:0100012	regulation of heart induction by canonical Wnt signaling pathway	BP	1814	1259	307	4	172
100012	GO:0001759	organ induction	BP	1814	1259	307	4	172
100012	GO:0042482	positive regulation of odontogenesis	BP	1814	1259	307	4	172
100012	GO:0060685	regulation of prostatic bud formation	BP	1814	1259	307	4	172
10518	GO:0010518	positive regulation of phospholipase activity	BP	1814	1259	307	4	172
10518	GO:0010863	positive regulation of phospholipase C activity	BP	1814	1259	307	4	172
10518	GO:0032429	regulation of phospholipase A2 activity	BP	1814	1259	307	4	172
10518	GO:0051004	regulation of lipoprotein lipase activity	BP	1814	1259	307	4	172
10718	GO:0010718	positive regulation of epithelial to mesenchymal transition	BP	1814	1259	307	3	172
10718	GO:0010719	negative regulation of epithelial to mesenchymal transition	BP	1814	1259	307	3	172
10718	GO:0062043	positive regulation of cardiac epithelial to mesenchymal transition	BP	1814	1259	307	3	172
10746	GO:0010746	regulation of long-chain fatty acid import across plasma membrane	BP	1814	1259	307	3	172
10746	GO:0032308	positive regulation of prostaglandin secretion	BP	1814	1259	307	3	172
10746	GO:0051957	positive regulation of amino acid transport	BP	1814	1259	307	3	172
10803	GO:0010803	regulation of tumor necrosis factor-mediated signaling pathway	BP	1814	1259	307	7	172
10803	GO:0001960	negative regulation of cytokine-mediated signaling pathway	BP	1814	1259	307	7	172
10803	GO:0001961	positive regulation of cytokine-mediated signaling pathway	BP	1814	1259	307	7	172
10803	GO:0010804	negative regulation of tumor necrosis factor-mediated signaling pathway	BP	1814	1259	307	7	172
10803	GO:0060338	regulation of type I interferon-mediated signaling pathway	BP	1814	1259	307	7	172
10803	GO:0060760	positive regulation of response to cytokine stimulus	BP	1814	1259	307	7	172
10803	GO:1903265	positive regulation of tumor necrosis factor-mediated signaling pathway	BP	1814	1259	307	7	172
10832	GO:0010832	negative regulation of myotube differentiation	BP	1814	1259	307	6	172
10832	GO:0051152	positive regulation of smooth muscle cell differentiation	BP	1814	1259	307	6	172
10832	GO:0051154	negative regulation of striated muscle cell differentiation	BP	1814	1259	307	6	172
10832	GO:1905063	regulation of vascular associated smooth muscle cell differentiation	BP	1814	1259	307	6	172
10832	GO:2000726	negative regulation of cardiac muscle cell differentiation	BP	1814	1259	307	6	172
10832	GO:2000727	positive regulation of cardiac muscle cell differentiation	BP	1814	1259	307	6	172
10875	GO:0010875	positive regulation of cholesterol efflux	BP	1814	1259	307	8	172
10875	GO:0010886	positive regulation of cholesterol storage	BP	1814	1259	307	8	172
10875	GO:0010887	negative regulation of cholesterol storage	BP	1814	1259	307	8	172
10875	GO:0010888	negative regulation of lipid storage	BP	1814	1259	307	8	172
10875	GO:0010891	negative regulation of sequestering of triglyceride	BP	1814	1259	307	8	172
10875	GO:0032368	regulation of lipid transport	BP	1814	1259	307	8	172
10875	GO:0032375	negative regulation of cholesterol transport	BP	1814	1259	307	8	172
10875	GO:2000192	negative regulation of fatty acid transport	BP	1814	1259	307	8	172
14911	GO:0014911	positive regulation of smooth muscle cell migration	BP	1814	1259	307	3	172
14911	GO:0014912	negative regulation of smooth muscle cell migration	BP	1814	1259	307	3	172
14911	GO:1904754	positive regulation of vascular associated smooth muscle cell migration	BP	1814	1259	307	3	172
1525	GO:0001525	angiogenesis	BP	1814	1259	307	7	172
1525	GO:0001568	blood vessel development	BP	1814	1259	307	7	172
1525	GO:0001570	vasculogenesis	BP	1814	1259	307	7	172
1525	GO:0007507	heart development	BP	1814	1259	307	7	172
1525	GO:0035909	aorta morphogenesis	BP	1814	1259	307	7	172
1525	GO:0048844	artery morphogenesis	BP	1814	1259	307	7	172
1525	GO:0061626	pharyngeal arch artery morphogenesis	BP	1814	1259	307	7	172
1541	GO:0001541	ovarian follicle development	BP	1814	1259	307	6	172
1541	GO:0001542	ovulation from ovarian follicle	BP	1814	1259	307	6	172
1541	GO:0008584	male gonad development	BP	1814	1259	307	6	172
1541	GO:0022602	ovulation cycle process	BP	1814	1259	307	6	172
1541	GO:0044849	estrous cycle	BP	1814	1259	307	6	172
1541	GO:0048608	reproductive structure development	BP	1814	1259	307	6	172
16202	GO:0016202	regulation of striated muscle tissue development	BP	1814	1259	307	3	172
16202	GO:0045843	negative regulation of striated muscle tissue development	BP	1814	1259	307	3	172
16202	GO:1901863	positive regulation of muscle tissue development	BP	1814	1259	307	3	172
16575	GO:0016575	histone deacetylation	BP	1814	1259	307	5	172
16575	GO:0034983	peptidyl-lysine deacetylation	BP	1814	1259	307	5	172
16575	GO:0070932	histone H3 deacetylation	BP	1814	1259	307	5	172
16575	GO:0070933	histone H4 deacetylation	BP	1814	1259	307	5	172
16575	GO:0090042	tubulin deacetylation	BP	1814	1259	307	5	172
1658	GO:0001658	branching involved in ureteric bud morphogenesis	BP	1814	1259	307	7	172
1658	GO:0001569	branching involved in blood vessel morphogenesis	BP	1814	1259	307	7	172
1658	GO:0001657	ureteric bud development	BP	1814	1259	307	7	172
1658	GO:0001822	kidney development	BP	1814	1259	307	7	172
1658	GO:0048754	branching morphogenesis of an epithelial tube	BP	1814	1259	307	7	172
1658	GO:0072049	comma-shaped body morphogenesis	BP	1814	1259	307	7	172
1658	GO:0072284	metanephric S-shaped body morphogenesis	BP	1814	1259	307	7	172
1701	GO:0001701	in utero embryonic development	BP	1814	1259	307	9	172
1701	GO:0001824	blastocyst development	BP	1814	1259	307	9	172
1701	GO:0001892	embryonic placenta development	BP	1814	1259	307	9	172
1701	GO:0001893	maternal placenta development	BP	1814	1259	307	9	172
1701	GO:0046697	decidualization	BP	1814	1259	307	9	172
1701	GO:0048568	embryonic organ development	BP	1814	1259	307	9	172
1701	GO:0060669	embryonic placenta morphogenesis	BP	1814	1259	307	9	172
1701	GO:0060711	labyrinthine layer development	BP	1814	1259	307	9	172
1701	GO:0060716	labyrinthine layer blood vessel development	BP	1814	1259	307	9	172
1711	GO:0001711	endodermal cell fate commitment	BP	1814	1259	307	6	172
1711	GO:0001707	mesoderm formation	BP	1814	1259	307	6	172
1711	GO:0001714	endodermal cell fate specification	BP	1814	1259	307	6	172
1711	GO:0035987	endodermal cell differentiation	BP	1814	1259	307	6	172
1711	GO:0048332	mesoderm morphogenesis	BP	1814	1259	307	6	172
1711	GO:0048341	paraxial mesoderm formation	BP	1814	1259	307	6	172
1756	GO:0001756	somitogenesis	BP	1814	1259	307	6	172
1756	GO:0007354	zygotic determination of anterior/posterior axis, embryo	BP	1814	1259	307	6	172
1756	GO:0009948	anterior/posterior axis specification	BP	1814	1259	307	6	172
1756	GO:0009950	dorsal/ventral axis specification	BP	1814	1259	307	6	172
1756	GO:0009952	anterior/posterior pattern specification	BP	1814	1259	307	6	172
1756	GO:0090244	Wnt signaling pathway involved in somitogenesis	BP	1814	1259	307	6	172
1782	GO:0001782	B cell homeostasis	BP	1814	1259	307	5	172
1782	GO:0002262	myeloid cell homeostasis	BP	1814	1259	307	5	172
1782	GO:0030218	erythrocyte differentiation	BP	1814	1259	307	5	172
1782	GO:0043029	T cell homeostasis	BP	1814	1259	307	5	172
1782	GO:0061515	myeloid cell development	BP	1814	1259	307	5	172
1837	GO:0001837	epithelial to mesenchymal transition	BP	1814	1259	307	6	172
1837	GO:0003198	epithelial to mesenchymal transition involved in endocardial cushion formation	BP	1814	1259	307	6	172
1837	GO:0003203	endocardial cushion morphogenesis	BP	1814	1259	307	6	172
1837	GO:0014032	neural crest cell development	BP	1814	1259	307	6	172
1837	GO:0061309	cardiac neural crest cell development involved in outflow tract morphogenesis	BP	1814	1259	307	6	172
1837	GO:0072132	mesenchyme morphogenesis	BP	1814	1259	307	6	172
1889	GO:0001889	liver development	BP	1814	1259	307	5	172
1889	GO:0030879	mammary gland development	BP	1814	1259	307	5	172
1889	GO:0070365	hepatocyte differentiation	BP	1814	1259	307	5	172
1889	GO:0072574	hepatocyte proliferation	BP	1814	1259	307	5	172
1889	GO:0097421	liver regeneration	BP	1814	1259	307	5	172
1900087	GO:1900087	positive regulation of G1/S transition of mitotic cell cycle	BP	1814	1259	307	7	172
1900087	GO:0007088	regulation of mitotic nuclear division	BP	1814	1259	307	7	172
1900087	GO:0031536	positive regulation of exit from mitosis	BP	1814	1259	307	7	172
1900087	GO:0045840	positive regulation of mitotic nuclear division	BP	1814	1259	307	7	172
1900087	GO:1902808	positive regulation of cell cycle G1/S phase transition	BP	1814	1259	307	7	172
1900087	GO:2000045	regulation of G1/S transition of mitotic cell cycle	BP	1814	1259	307	7	172
1900087	GO:2000134	negative regulation of G1/S transition of mitotic cell cycle	BP	1814	1259	307	7	172
1900182	GO:1900182	positive regulation of protein localization to nucleus	BP	1814	1259	307	4	172
1900182	GO:0042307	positive regulation of protein import into nucleus	BP	1814	1259	307	4	172
1900182	GO:0046827	positive regulation of protein export from nucleus	BP	1814	1259	307	4	172
1900182	GO:1904871	positive regulation of protein localization to Cajal body	BP	1814	1259	307	4	172
1900369	GO:1900369	negative regulation of post-transcriptional gene silencing by RNA	BP	1814	1259	307	6	172
1900369	GO:0060965	negative regulation of miRNA-mediated gene silencing	BP	1814	1259	307	6	172
1900369	GO:1900370	positive regulation of post-transcriptional gene silencing by RNA	BP	1814	1259	307	6	172
1900369	GO:1903799	negative regulation of miRNA maturation	BP	1814	1259	307	6	172
1900369	GO:1903800	positive regulation of miRNA maturation	BP	1814	1259	307	6	172
1900369	GO:2000637	positive regulation of miRNA-mediated gene silencing	BP	1814	1259	307	6	172
1901533	GO:1901533	negative regulation of hematopoietic progenitor cell differentiation	BP	1814	1259	307	3	172
1901533	GO:1902037	negative regulation of hematopoietic stem cell differentiation	BP	1814	1259	307	3	172
1901533	GO:1905456	regulation of lymphoid progenitor cell differentiation	BP	1814	1259	307	3	172
1902177	GO:1902177	positive regulation of oxidative stress-induced intrinsic apoptotic signaling pathway	BP	1814	1259	307	9	172
1902177	GO:1901299	negative regulation of hydrogen peroxide-mediated programmed cell death	BP	1814	1259	307	9	172
1902177	GO:1901300	positive regulation of hydrogen peroxide-mediated programmed cell death	BP	1814	1259	307	9	172
1902177	GO:1902175	regulation of oxidative stress-induced intrinsic apoptotic signaling pathway	BP	1814	1259	307	9	172
1902177	GO:1902176	negative regulation of oxidative stress-induced intrinsic apoptotic signaling pathway	BP	1814	1259	307	9	172
1902177	GO:1903208	negative regulation of hydrogen peroxide-induced neuron death	BP	1814	1259	307	9	172
1902177	GO:1903223	positive regulation of oxidative stress-induced neuron death	BP	1814	1259	307	9	172
1902177	GO:1903376	regulation of oxidative stress-induced neuron intrinsic apoptotic signaling pathway	BP	1814	1259	307	9	172
1902177	GO:1903377	negative regulation of oxidative stress-induced neuron intrinsic apoptotic signaling pathway	BP	1814	1259	307	9	172
1903243	GO:1903243	negative regulation of cardiac muscle hypertrophy in response to stress	BP	1814	1259	307	3	172
1903243	GO:0010613	positive regulation of cardiac muscle hypertrophy	BP	1814	1259	307	3	172
1903243	GO:0010614	negative regulation of cardiac muscle hypertrophy	BP	1814	1259	307	3	172
1903829	GO:1903829	positive regulation of protein localization	BP	1814	1259	307	3	172
1903829	GO:1903828	negative regulation of protein localization	BP	1814	1259	307	3	172
1903829	GO:1905475	regulation of protein localization to membrane	BP	1814	1259	307	3	172
1905332	GO:1905332	positive regulation of morphogenesis of an epithelium	BP	1814	1259	307	6	172
1905332	GO:0060687	regulation of branching involved in prostate gland morphogenesis	BP	1814	1259	307	6	172
1905332	GO:0060693	regulation of branching involved in salivary gland morphogenesis	BP	1814	1259	307	6	172
1905332	GO:0061046	regulation of branching involved in lung morphogenesis	BP	1814	1259	307	6	172
1905332	GO:1901509	regulation of endothelial tube morphogenesis	BP	1814	1259	307	6	172
1905332	GO:1905278	positive regulation of epithelial tube formation	BP	1814	1259	307	6	172
1938	GO:0001938	positive regulation of endothelial cell proliferation	BP	1814	1259	307	7	172
1938	GO:0001937	negative regulation of endothelial cell proliferation	BP	1814	1259	307	7	172
1938	GO:0050679	positive regulation of epithelial cell proliferation	BP	1814	1259	307	7	172
1938	GO:0050680	negative regulation of epithelial cell proliferation	BP	1814	1259	307	7	172
1938	GO:1903589	positive regulation of blood vessel endothelial cell proliferation involved in sprouting angiogenesis	BP	1814	1259	307	7	172
1938	GO:1905562	regulation of vascular endothelial cell proliferation	BP	1814	1259	307	7	172
1938	GO:1905564	positive regulation of vascular endothelial cell proliferation	BP	1814	1259	307	7	172
1974	GO:0001974	blood vessel remodeling	BP	1814	1259	307	10	172
1974	GO:0045453	bone resorption	BP	1814	1259	307	10	172
1974	GO:0060028	convergent extension involved in axis elongation	BP	1814	1259	307	10	172
1974	GO:0060056	mammary gland involution	BP	1814	1259	307	10	172
1974	GO:0060449	bud elongation involved in lung branching	BP	1814	1259	307	10	172
1974	GO:0060592	mammary gland formation	BP	1814	1259	307	10	172
1974	GO:0060681	branch elongation involved in ureteric bud branching	BP	1814	1259	307	10	172
1974	GO:0060744	mammary gland branching involved in thelarche	BP	1814	1259	307	10	172
1974	GO:0060745	mammary gland branching involved in pregnancy	BP	1814	1259	307	10	172
1974	GO:0060751	branch elongation involved in mammary gland duct branching	BP	1814	1259	307	10	172
2000109	GO:2000109	regulation of macrophage apoptotic process	BP	1814	1259	307	8	172
2000109	GO:0002902	regulation of B cell apoptotic process	BP	1814	1259	307	8	172
2000109	GO:0002903	negative regulation of B cell apoptotic process	BP	1814	1259	307	8	172
2000109	GO:0033033	negative regulation of myeloid cell apoptotic process	BP	1814	1259	307	8	172
2000109	GO:0033034	positive regulation of myeloid cell apoptotic process	BP	1814	1259	307	8	172
2000109	GO:0070230	positive regulation of lymphocyte apoptotic process	BP	1814	1259	307	8	172
2000109	GO:0070232	regulation of T cell apoptotic process	BP	1814	1259	307	8	172
2000109	GO:2000108	positive regulation of leukocyte apoptotic process	BP	1814	1259	307	8	172
2000352	GO:2000352	negative regulation of endothelial cell apoptotic process	BP	1814	1259	307	5	172
2000352	GO:1902172	regulation of keratinocyte apoptotic process	BP	1814	1259	307	5	172
2000352	GO:1903944	negative regulation of hepatocyte apoptotic process	BP	1814	1259	307	5	172
2000352	GO:1904037	positive regulation of epithelial cell apoptotic process	BP	1814	1259	307	5	172
2000352	GO:2000353	positive regulation of endothelial cell apoptotic process	BP	1814	1259	307	5	172
2000379	GO:2000379	positive regulation of reactive oxygen species metabolic process	BP	1814	1259	307	6	172
2000379	GO:0010310	regulation of hydrogen peroxide metabolic process	BP	1814	1259	307	6	172
2000379	GO:0090322	regulation of superoxide metabolic process	BP	1814	1259	307	6	172
2000379	GO:1903427	negative regulation of reactive oxygen species biosynthetic process	BP	1814	1259	307	6	172
2000379	GO:1903428	positive regulation of reactive oxygen species biosynthetic process	BP	1814	1259	307	6	172
2000379	GO:2000378	negative regulation of reactive oxygen species metabolic process	BP	1814	1259	307	6	172
2000573	GO:2000573	positive regulation of DNA biosynthetic process	BP	1814	1259	307	11	172
2000573	GO:0006275	regulation of DNA replication	BP	1814	1259	307	11	172
2000573	GO:0030071	regulation of mitotic metaphase/anaphase transition	BP	1814	1259	307	11	172
2000573	GO:0032206	positive regulation of telomere maintenance	BP	1814	1259	307	11	172
2000573	GO:0032211	negative regulation of telomere maintenance via telomerase	BP	1814	1259	307	11	172
2000573	GO:0032212	positive regulation of telomere maintenance via telomerase	BP	1814	1259	307	11	172
2000573	GO:0051053	negative regulation of DNA metabolic process	BP	1814	1259	307	11	172
2000573	GO:0051054	positive regulation of DNA metabolic process	BP	1814	1259	307	11	172
2000573	GO:0051973	positive regulation of telomerase activity	BP	1814	1259	307	11	172
2000573	GO:0051974	negative regulation of telomerase activity	BP	1814	1259	307	11	172
2000573	GO:1904354	negative regulation of telomere capping	BP	1814	1259	307	11	172
2000630	GO:2000630	positive regulation of miRNA metabolic process	BP	1814	1259	307	4	172
2000630	GO:1902894	negative regulation of miRNA transcription	BP	1814	1259	307	4	172
2000630	GO:1902895	positive regulation of miRNA transcription	BP	1814	1259	307	4	172
2000630	GO:2000629	negative regulation of miRNA metabolic process	BP	1814	1259	307	4	172
2000819	GO:2000819	regulation of nucleotide-excision repair	BP	1814	1259	307	7	172
2000819	GO:0010569	regulation of double-strand break repair via homologous recombination	BP	1814	1259	307	7	172
2000819	GO:0045739	positive regulation of DNA repair	BP	1814	1259	307	7	172
2000819	GO:1905168	positive regulation of double-strand break repair via homologous recombination	BP	1814	1259	307	7	172
2000819	GO:2000779	regulation of double-strand break repair	BP	1814	1259	307	7	172
2000819	GO:2000781	positive regulation of double-strand break repair	BP	1814	1259	307	7	172
2000819	GO:2001032	regulation of double-strand break repair via nonhomologous end joining	BP	1814	1259	307	7	172
2001237	GO:2001237	negative regulation of extrinsic apoptotic signaling pathway	BP	1814	1259	307	13	172
2001237	GO:0090200	positive regulation of release of cytochrome c from mitochondria	BP	1814	1259	307	13	172
2001237	GO:0090201	negative regulation of release of cytochrome c from mitochondria	BP	1814	1259	307	13	172
2001237	GO:1902042	negative regulation of extrinsic apoptotic signaling pathway via death domain receptors	BP	1814	1259	307	13	172
2001237	GO:1902043	positive regulation of extrinsic apoptotic signaling pathway via death domain receptors	BP	1814	1259	307	13	172
2001237	GO:1902236	negative regulation of endoplasmic reticulum stress-induced intrinsic apoptotic signaling pathway	BP	1814	1259	307	13	172
2001237	GO:1903146	regulation of autophagy of mitochondrion	BP	1814	1259	307	13	172
2001237	GO:2001234	negative regulation of apoptotic signaling pathway	BP	1814	1259	307	13	172
2001237	GO:2001238	positive regulation of extrinsic apoptotic signaling pathway	BP	1814	1259	307	13	172
2001237	GO:2001240	negative regulation of extrinsic apoptotic signaling pathway in absence of ligand	BP	1814	1259	307	13	172
2001237	GO:2001242	regulation of intrinsic apoptotic signaling pathway	BP	1814	1259	307	13	172
2001237	GO:2001243	negative regulation of intrinsic apoptotic signaling pathway	BP	1814	1259	307	13	172
2001237	GO:2001244	positive regulation of intrinsic apoptotic signaling pathway	BP	1814	1259	307	13	172
2067	GO:0002067	glandular epithelial cell differentiation	BP	1814	1259	307	4	172
2067	GO:0002068	glandular epithelial cell development	BP	1814	1259	307	4	172
2067	GO:0060576	intestinal epithelial cell development	BP	1814	1259	307	4	172
2067	GO:0071895	odontoblast differentiation	BP	1814	1259	307	4	172
2070	GO:0002070	epithelial cell maturation	BP	1814	1259	307	3	172
2070	GO:0048469	cell maturation	BP	1814	1259	307	3	172
2070	GO:0048799	animal organ maturation	BP	1814	1259	307	3	172
2088	GO:0002088	lens development in camera-type eye	BP	1814	1259	307	4	172
2088	GO:0003407	neural retina development	BP	1814	1259	307	4	172
2088	GO:0048593	camera-type eye morphogenesis	BP	1814	1259	307	4	172
2088	GO:0060900	embryonic camera-type eye formation	BP	1814	1259	307	4	172
2092	GO:0002092	positive regulation of receptor internalization	BP	1814	1259	307	5	172
2092	GO:0045807	positive regulation of endocytosis	BP	1814	1259	307	5	172
2092	GO:0048260	positive regulation of receptor-mediated endocytosis	BP	1814	1259	307	5	172
2092	GO:0048549	positive regulation of pinocytosis	BP	1814	1259	307	5	172
2092	GO:1905598	negative regulation of low-density lipoprotein receptor activity	BP	1814	1259	307	5	172
2286	GO:0002286	T cell activation involved in immune response	BP	1814	1259	307	4	172
2286	GO:0002263	cell activation involved in immune response	BP	1814	1259	307	4	172
2286	GO:0042093	T-helper cell differentiation	BP	1814	1259	307	4	172
2286	GO:0042098	T cell proliferation	BP	1814	1259	307	4	172
2690	GO:0002690	positive regulation of leukocyte chemotaxis	BP	1814	1259	307	10	172
2690	GO:0010758	regulation of macrophage chemotaxis	BP	1814	1259	307	10	172
2690	GO:0030335	positive regulation of cell migration	BP	1814	1259	307	10	172
2690	GO:0050927	positive regulation of positive chemotaxis	BP	1814	1259	307	10	172
2690	GO:0050930	induction of positive chemotaxis	BP	1814	1259	307	10	172
2690	GO:0071675	regulation of mononuclear cell migration	BP	1814	1259	307	10	172
2690	GO:0071677	positive regulation of mononuclear cell migration	BP	1814	1259	307	10	172
2690	GO:0090022	regulation of neutrophil chemotaxis	BP	1814	1259	307	10	172
2690	GO:0090026	positive regulation of monocyte chemotaxis	BP	1814	1259	307	10	172
2690	GO:2000503	positive regulation of natural killer cell chemotaxis	BP	1814	1259	307	10	172
2719	GO:0002719	negative regulation of cytokine production involved in immune response	BP	1814	1259	307	8	172
2719	GO:0002639	positive regulation of immunoglobulin production	BP	1814	1259	307	8	172
2719	GO:0002698	negative regulation of immune effector process	BP	1814	1259	307	8	172
2719	GO:0002699	positive regulation of immune effector process	BP	1814	1259	307	8	172
2719	GO:0002725	negative regulation of T cell cytokine production	BP	1814	1259	307	8	172
2719	GO:0002726	positive regulation of T cell cytokine production	BP	1814	1259	307	8	172
2719	GO:0032763	regulation of mast cell cytokine production	BP	1814	1259	307	8	172
2719	GO:0060907	positive regulation of macrophage cytokine production	BP	1814	1259	307	8	172
2755	GO:0002755	MyD88-dependent toll-like receptor signaling pathway	BP	1814	1259	307	5	172
2755	GO:0002223	stimulatory C-type lectin receptor signaling pathway	BP	1814	1259	307	5	172
2755	GO:0002753	cytosolic pattern recognition receptor signaling pathway	BP	1814	1259	307	5	172
2755	GO:0034134	toll-like receptor 2 signaling pathway	BP	1814	1259	307	5	172
2755	GO:0034142	toll-like receptor 4 signaling pathway	BP	1814	1259	307	5	172
2821	GO:0002821	positive regulation of adaptive immune response	BP	1814	1259	307	4	172
2821	GO:0002824	positive regulation of adaptive immune response based on somatic recombination of immune receptors built from immunoglobulin superfamily domains	BP	1814	1259	307	4	172
2821	GO:0002840	regulation of T cell mediated immune response to tumor cell	BP	1814	1259	307	4	172
2821	GO:0002889	regulation of immunoglobulin mediated immune response	BP	1814	1259	307	4	172
30183	GO:0030183	B cell differentiation	BP	1814	1259	307	6	172
30183	GO:0002327	immature B cell differentiation	BP	1814	1259	307	6	172
30183	GO:0002360	T cell lineage commitment	BP	1814	1259	307	6	172
30183	GO:0030217	T cell differentiation	BP	1814	1259	307	6	172
30183	GO:0033077	T cell differentiation in thymus	BP	1814	1259	307	6	172
30183	GO:0043368	positive T cell selection	BP	1814	1259	307	6	172
30225	GO:0030225	macrophage differentiation	BP	1814	1259	307	3	172
30225	GO:0030224	monocyte differentiation	BP	1814	1259	307	3	172
30225	GO:0043011	myeloid dendritic cell differentiation	BP	1814	1259	307	3	172
30279	GO:0030279	negative regulation of ossification	BP	1814	1259	307	5	172
30279	GO:0030501	positive regulation of bone mineralization	BP	1814	1259	307	5	172
30279	GO:0030502	negative regulation of bone mineralization	BP	1814	1259	307	5	172
30279	GO:0045778	positive regulation of ossification	BP	1814	1259	307	5	172
30279	GO:0070168	negative regulation of biomineral tissue development	BP	1814	1259	307	5	172
30308	GO:0030308	negative regulation of cell growth	BP	1814	1259	307	6	172
30308	GO:0030307	positive regulation of cell growth	BP	1814	1259	307	6	172
30308	GO:0030516	regulation of axon extension	BP	1814	1259	307	6	172
30308	GO:0048638	regulation of developmental growth	BP	1814	1259	307	6	172
30308	GO:0048639	positive regulation of developmental growth	BP	1814	1259	307	6	172
30308	GO:0048640	negative regulation of developmental growth	BP	1814	1259	307	6	172
30324	GO:0030324	lung development	BP	1814	1259	307	7	172
30324	GO:0003139	secondary heart field specification	BP	1814	1259	307	7	172
30324	GO:0060425	lung morphogenesis	BP	1814	1259	307	7	172
30324	GO:0060430	lung saccule development	BP	1814	1259	307	7	172
30324	GO:0060440	trachea formation	BP	1814	1259	307	7	172
30324	GO:0060487	lung epithelial cell differentiation	BP	1814	1259	307	7	172
30324	GO:0060509	type I pneumocyte differentiation	BP	1814	1259	307	7	172
30325	GO:0030325	adrenal gland development	BP	1814	1259	307	4	172
30325	GO:0021983	pituitary gland development	BP	1814	1259	307	4	172
30325	GO:0030878	thyroid gland development	BP	1814	1259	307	4	172
30325	GO:0031018	endocrine pancreas development	BP	1814	1259	307	4	172
30512	GO:0030512	negative regulation of transforming growth factor beta receptor signaling pathway	BP	1814	1259	307	5	172
30512	GO:0010862	positive regulation of pathway-restricted SMAD protein phosphorylation	BP	1814	1259	307	5	172
30512	GO:0030511	positive regulation of transforming growth factor beta receptor signaling pathway	BP	1814	1259	307	5	172
30512	GO:0030514	negative regulation of BMP signaling pathway	BP	1814	1259	307	5	172
30512	GO:0060394	negative regulation of pathway-restricted SMAD protein phosphorylation	BP	1814	1259	307	5	172
30857	GO:0030857	negative regulation of epithelial cell differentiation	BP	1814	1259	307	5	172
30857	GO:0045605	negative regulation of epidermal cell differentiation	BP	1814	1259	307	5	172
30857	GO:0045606	positive regulation of epidermal cell differentiation	BP	1814	1259	307	5	172
30857	GO:0045616	regulation of keratinocyte differentiation	BP	1814	1259	307	5	172
30857	GO:1903140	regulation of establishment of endothelial barrier	BP	1814	1259	307	5	172
30890	GO:0030890	positive regulation of B cell proliferation	BP	1814	1259	307	7	172
30890	GO:0030889	negative regulation of B cell proliferation	BP	1814	1259	307	7	172
30890	GO:0042102	positive regulation of T cell proliferation	BP	1814	1259	307	7	172
30890	GO:0042104	positive regulation of activated T cell proliferation	BP	1814	1259	307	7	172
30890	GO:0042129	regulation of T cell proliferation	BP	1814	1259	307	7	172
30890	GO:0050871	positive regulation of B cell activation	BP	1814	1259	307	7	172
30890	GO:0070665	positive regulation of leukocyte proliferation	BP	1814	1259	307	7	172
31397	GO:0031397	negative regulation of protein ubiquitination	BP	1814	1259	307	7	172
31397	GO:0031396	regulation of protein ubiquitination	BP	1814	1259	307	7	172
31397	GO:0031398	positive regulation of protein ubiquitination	BP	1814	1259	307	7	172
31397	GO:0033233	regulation of protein sumoylation	BP	1814	1259	307	7	172
31397	GO:0051443	positive regulation of ubiquitin-protein transferase activity	BP	1814	1259	307	7	172
31397	GO:0051444	negative regulation of ubiquitin-protein transferase activity	BP	1814	1259	307	7	172
31397	GO:1904668	positive regulation of ubiquitin protein ligase activity	BP	1814	1259	307	7	172
3181	GO:0003181	atrioventricular valve morphogenesis	BP	1814	1259	307	6	172
3181	GO:0003176	aortic valve development	BP	1814	1259	307	6	172
3181	GO:0003177	pulmonary valve development	BP	1814	1259	307	6	172
3181	GO:0003180	aortic valve morphogenesis	BP	1814	1259	307	6	172
3181	GO:0003184	pulmonary valve morphogenesis	BP	1814	1259	307	6	172
3181	GO:0003188	heart valve formation	BP	1814	1259	307	6	172
31954	GO:0031954	positive regulation of protein autophosphorylation	BP	1814	1259	307	3	172
31954	GO:0031953	negative regulation of protein autophosphorylation	BP	1814	1259	307	3	172
31954	GO:1900084	regulation of peptidyl-tyrosine autophosphorylation	BP	1814	1259	307	3	172
32000	GO:0032000	positive regulation of fatty acid beta-oxidation	BP	1814	1259	307	21	172
32000	GO:0010894	negative regulation of steroid biosynthetic process	BP	1814	1259	307	21	172
32000	GO:0031394	positive regulation of prostaglandin biosynthetic process	BP	1814	1259	307	21	172
32000	GO:0031998	regulation of fatty acid beta-oxidation	BP	1814	1259	307	21	172
32000	GO:0043552	positive regulation of phosphatidylinositol 3-kinase activity	BP	1814	1259	307	21	172
32000	GO:0045541	negative regulation of cholesterol biosynthetic process	BP	1814	1259	307	21	172
32000	GO:0045542	positive regulation of cholesterol biosynthetic process	BP	1814	1259	307	21	172
32000	GO:0045717	negative regulation of fatty acid biosynthetic process	BP	1814	1259	307	21	172
32000	GO:0045723	positive regulation of fatty acid biosynthetic process	BP	1814	1259	307	21	172
32000	GO:0045834	positive regulation of lipid metabolic process	BP	1814	1259	307	21	172
32000	GO:0045940	positive regulation of steroid metabolic process	BP	1814	1259	307	21	172
32000	GO:0046321	positive regulation of fatty acid oxidation	BP	1814	1259	307	21	172
32000	GO:0046889	positive regulation of lipid biosynthetic process	BP	1814	1259	307	21	172
32000	GO:0050810	regulation of steroid biosynthetic process	BP	1814	1259	307	21	172
32000	GO:0050995	negative regulation of lipid catabolic process	BP	1814	1259	307	21	172
32000	GO:0050996	positive regulation of lipid catabolic process	BP	1814	1259	307	21	172
32000	GO:0070857	regulation of bile acid biosynthetic process	BP	1814	1259	307	21	172
32000	GO:0090181	regulation of cholesterol metabolic process	BP	1814	1259	307	21	172
32000	GO:0090208	positive regulation of triglyceride metabolic process	BP	1814	1259	307	21	172
32000	GO:1902931	negative regulation of alcohol biosynthetic process	BP	1814	1259	307	21	172
32000	GO:2001280	positive regulation of unsaturated fatty acid biosynthetic process	BP	1814	1259	307	21	172
32024	GO:0032024	positive regulation of insulin secretion	BP	1814	1259	307	11	172
32024	GO:0035774	positive regulation of insulin secretion involved in cellular response to glucose stimulus	BP	1814	1259	307	11	172
32024	GO:0045920	negative regulation of exocytosis	BP	1814	1259	307	11	172
32024	GO:0046676	negative regulation of insulin secretion	BP	1814	1259	307	11	172
32024	GO:0046887	positive regulation of hormone secretion	BP	1814	1259	307	11	172
32024	GO:0050714	positive regulation of protein secretion	BP	1814	1259	307	11	172
32024	GO:0050796	regulation of insulin secretion	BP	1814	1259	307	11	172
32024	GO:0051222	positive regulation of protein transport	BP	1814	1259	307	11	172
32024	GO:0051224	negative regulation of protein transport	BP	1814	1259	307	11	172
32024	GO:0090317	negative regulation of intracellular protein transport	BP	1814	1259	307	11	172
32024	GO:1903531	negative regulation of secretion by cell	BP	1814	1259	307	11	172
32092	GO:0032092	positive regulation of protein binding	BP	1814	1259	307	13	172
32092	GO:0032091	negative regulation of protein binding	BP	1814	1259	307	13	172
32092	GO:0043388	positive regulation of DNA binding	BP	1814	1259	307	13	172
32092	GO:0043392	negative regulation of DNA binding	BP	1814	1259	307	13	172
32092	GO:0043393	regulation of protein binding	BP	1814	1259	307	13	172
32092	GO:0051099	positive regulation of binding	BP	1814	1259	307	13	172
32092	GO:0051101	regulation of DNA binding	BP	1814	1259	307	13	172
32092	GO:1900121	negative regulation of receptor binding	BP	1814	1259	307	13	172
32092	GO:1900122	positive regulation of receptor binding	BP	1814	1259	307	13	172
32092	GO:1903026	negative regulation of RNA polymerase II regulatory region sequence-specific DNA binding	BP	1814	1259	307	13	172
32092	GO:1904798	positive regulation of core promoter binding	BP	1814	1259	307	13	172
32092	GO:2000678	negative regulation of transcription regulatory region DNA binding	BP	1814	1259	307	13	172
32092	GO:2000679	positive regulation of transcription regulatory region DNA binding	BP	1814	1259	307	13	172
32411	GO:0032411	positive regulation of transporter activity	BP	1814	1259	307	6	172
32411	GO:0022898	regulation of transmembrane transporter activity	BP	1814	1259	307	6	172
32411	GO:0032413	negative regulation of ion transmembrane transporter activity	BP	1814	1259	307	6	172
32411	GO:0051926	negative regulation of calcium ion transport	BP	1814	1259	307	6	172
32411	GO:1903170	negative regulation of calcium ion transmembrane transport	BP	1814	1259	307	6	172
32411	GO:1904063	negative regulation of cation transmembrane transport	BP	1814	1259	307	6	172
32436	GO:0032436	positive regulation of proteasomal ubiquitin-dependent protein catabolic process	BP	1814	1259	307	25	172
32436	GO:0010507	negative regulation of autophagy	BP	1814	1259	307	25	172
32436	GO:0010508	positive regulation of autophagy	BP	1814	1259	307	25	172
32436	GO:0010952	positive regulation of peptidase activity	BP	1814	1259	307	25	172
32436	GO:0016239	positive regulation of macroautophagy	BP	1814	1259	307	25	172
32436	GO:0016241	regulation of macroautophagy	BP	1814	1259	307	25	172
32436	GO:0016242	negative regulation of macroautophagy	BP	1814	1259	307	25	172
32436	GO:0032434	regulation of proteasomal ubiquitin-dependent protein catabolic process	BP	1814	1259	307	25	172
32436	GO:0042177	negative regulation of protein catabolic process	BP	1814	1259	307	25	172
32436	GO:0045732	positive regulation of protein catabolic process	BP	1814	1259	307	25	172
32436	GO:0048025	negative regulation of mRNA splicing, via spliceosome	BP	1814	1259	307	25	172
32436	GO:0048255	mRNA stabilization	BP	1814	1259	307	25	172
32436	GO:0061136	regulation of proteasomal protein catabolic process	BP	1814	1259	307	25	172
32436	GO:0070935	3'-UTR-mediated mRNA stabilization	BP	1814	1259	307	25	172
32436	GO:0090141	positive regulation of mitochondrial fission	BP	1814	1259	307	25	172
32436	GO:1900103	positive regulation of endoplasmic reticulum unfolded protein response	BP	1814	1259	307	25	172
32436	GO:1901525	negative regulation of mitophagy	BP	1814	1259	307	25	172
32436	GO:1903071	positive regulation of ER-associated ubiquitin-dependent protein catabolic process	BP	1814	1259	307	25	172
32436	GO:1903599	positive regulation of autophagy of mitochondrion	BP	1814	1259	307	25	172
32436	GO:1903896	positive regulation of IRE1-mediated unfolded protein response	BP	1814	1259	307	25	172
32436	GO:1903897	regulation of PERK-mediated unfolded protein response	BP	1814	1259	307	25	172
32436	GO:1905784	regulation of anaphase-promoting complex-dependent catabolic process	BP	1814	1259	307	25	172
32436	GO:2000058	regulation of ubiquitin-dependent protein catabolic process	BP	1814	1259	307	25	172
32436	GO:2000059	negative regulation of ubiquitin-dependent protein catabolic process	BP	1814	1259	307	25	172
32436	GO:2000060	positive regulation of ubiquitin-dependent protein catabolic process	BP	1814	1259	307	25	172
32510	GO:0032510	endosome to lysosome transport via multivesicular body sorting pathway	BP	1814	1259	307	5	172
32510	GO:0006622	protein targeting to lysosome	BP	1814	1259	307	5	172
32510	GO:0007041	lysosomal transport	BP	1814	1259	307	5	172
32510	GO:0045324	late endosome to vacuole transport	BP	1814	1259	307	5	172
32510	GO:1902774	late endosome to lysosome transport	BP	1814	1259	307	5	172
32722	GO:0032722	positive regulation of chemokine production	BP	1814	1259	307	5	172
32722	GO:0032682	negative regulation of chemokine production	BP	1814	1259	307	5	172
32722	GO:0071639	positive regulation of monocyte chemotactic protein-1 production	BP	1814	1259	307	5	172
32722	GO:2000341	regulation of chemokine (C-X-C motif) ligand 2 production	BP	1814	1259	307	5	172
32722	GO:2000343	positive regulation of chemokine (C-X-C motif) ligand 2 production	BP	1814	1259	307	5	172
32727	GO:0032727	positive regulation of interferon-alpha production	BP	1814	1259	307	3	172
32727	GO:0032481	positive regulation of type I interferon production	BP	1814	1259	307	3	172
32727	GO:0032728	positive regulation of interferon-beta production	BP	1814	1259	307	3	172
32731	GO:0032731	positive regulation of interleukin-1 beta production	BP	1814	1259	307	3	172
32731	GO:0032691	negative regulation of interleukin-1 beta production	BP	1814	1259	307	3	172
32731	GO:0032692	negative regulation of interleukin-1 production	BP	1814	1259	307	3	172
32780	GO:0032780	negative regulation of ATP-dependent activity	BP	1814	1259	307	4	172
32780	GO:0032781	positive regulation of ATP-dependent activity	BP	1814	1259	307	4	172
32780	GO:0051097	negative regulation of helicase activity	BP	1814	1259	307	4	172
32780	GO:1905774	regulation of DNA helicase activity	BP	1814	1259	307	4	172
32869	GO:0032869	cellular response to insulin stimulus	BP	1814	1259	307	11	172
32869	GO:0008286	insulin receptor signaling pathway	BP	1814	1259	307	11	172
32869	GO:0010243	response to organonitrogen compound	BP	1814	1259	307	11	172
32869	GO:0032868	response to insulin	BP	1814	1259	307	11	172
32869	GO:0032870	cellular response to hormone stimulus	BP	1814	1259	307	11	172
32869	GO:0038166	angiotensin-activated signaling pathway	BP	1814	1259	307	11	172
32869	GO:0043434	response to peptide hormone	BP	1814	1259	307	11	172
32869	GO:0071417	cellular response to organonitrogen compound	BP	1814	1259	307	11	172
32869	GO:1901653	cellular response to peptide	BP	1814	1259	307	11	172
32869	GO:1904385	cellular response to angiotensin	BP	1814	1259	307	11	172
32869	GO:1904646	cellular response to amyloid-beta	BP	1814	1259	307	11	172
32922	GO:0032922	circadian regulation of gene expression	BP	1814	1259	307	3	172
32922	GO:0007623	circadian rhythm	BP	1814	1259	307	3	172
32922	GO:0045475	locomotor rhythm	BP	1814	1259	307	3	172
33189	GO:0033189	response to vitamin A	BP	1814	1259	307	4	172
33189	GO:0033197	response to vitamin E	BP	1814	1259	307	4	172
33189	GO:0033280	response to vitamin D	BP	1814	1259	307	4	172
33189	GO:0071295	cellular response to vitamin	BP	1814	1259	307	4	172
3331	GO:0003331	positive regulation of extracellular matrix constituent secretion	BP	1814	1259	307	4	172
3331	GO:0010715	regulation of extracellular matrix disassembly	BP	1814	1259	307	4	172
3331	GO:1901201	regulation of extracellular matrix assembly	BP	1814	1259	307	4	172
3331	GO:1903055	positive regulation of extracellular matrix organization	BP	1814	1259	307	4	172
33598	GO:0033598	mammary gland epithelial cell proliferation	BP	1814	1259	307	6	172
33598	GO:0007595	lactation	BP	1814	1259	307	6	172
33598	GO:0060444	branching involved in mammary gland duct morphogenesis	BP	1814	1259	307	6	172
33598	GO:0060603	mammary gland duct morphogenesis	BP	1814	1259	307	6	172
33598	GO:0060644	mammary gland epithelial cell differentiation	BP	1814	1259	307	6	172
33598	GO:0060749	mammary gland alveolus development	BP	1814	1259	307	6	172
34034	GO:0034034	purine nucleoside bisphosphate catabolic process	BP	1814	1259	307	3	172
34034	GO:0034031	ribonucleoside bisphosphate catabolic process	BP	1814	1259	307	3	172
34034	GO:1901289	succinyl-CoA catabolic process	BP	1814	1259	307	3	172
34121	GO:0034121	regulation of toll-like receptor signaling pathway	BP	1814	1259	307	4	172
34121	GO:0034136	negative regulation of toll-like receptor 2 signaling pathway	BP	1814	1259	307	4	172
34121	GO:0034139	regulation of toll-like receptor 3 signaling pathway	BP	1814	1259	307	4	172
34121	GO:0034143	regulation of toll-like receptor 4 signaling pathway	BP	1814	1259	307	4	172
34123	GO:0034123	positive regulation of toll-like receptor signaling pathway	BP	1814	1259	307	3	172
34123	GO:0034122	negative regulation of toll-like receptor signaling pathway	BP	1814	1259	307	3	172
34123	GO:0070434	positive regulation of nucleotide-binding oligomerization domain containing 2 signaling pathway	BP	1814	1259	307	3	172
34374	GO:0034374	low-density lipoprotein particle remodeling	BP	1814	1259	307	4	172
34374	GO:0034372	very-low-density lipoprotein particle remodeling	BP	1814	1259	307	4	172
34374	GO:0034380	high-density lipoprotein particle assembly	BP	1814	1259	307	4	172
34374	GO:0034383	low-density lipoprotein particle clearance	BP	1814	1259	307	4	172
34392	GO:0034392	negative regulation of smooth muscle cell apoptotic process	BP	1814	1259	307	6	172
34392	GO:0010656	negative regulation of muscle cell apoptotic process	BP	1814	1259	307	6	172
34392	GO:0010666	positive regulation of cardiac muscle cell apoptotic process	BP	1814	1259	307	6	172
34392	GO:0010667	negative regulation of cardiac muscle cell apoptotic process	BP	1814	1259	307	6	172
34392	GO:0034393	positive regulation of smooth muscle cell apoptotic process	BP	1814	1259	307	6	172
34392	GO:1905459	regulation of vascular associated smooth muscle cell apoptotic process	BP	1814	1259	307	6	172
34605	GO:0034605	cellular response to heat	BP	1814	1259	307	4	172
34605	GO:0009408	response to heat	BP	1814	1259	307	4	172
34605	GO:0009409	response to cold	BP	1814	1259	307	4	172
34605	GO:0070370	cellular heat acclimation	BP	1814	1259	307	4	172
34620	GO:0034620	cellular response to unfolded protein	BP	1814	1259	307	9	172
34620	GO:0006983	ER overload response	BP	1814	1259	307	9	172
34620	GO:0006986	response to unfolded protein	BP	1814	1259	307	9	172
34620	GO:0030968	endoplasmic reticulum unfolded protein response	BP	1814	1259	307	9	172
34620	GO:0032933	SREBP signaling pathway	BP	1814	1259	307	9	172
34620	GO:0036498	IRE1-mediated unfolded protein response	BP	1814	1259	307	9	172
34620	GO:0036499	PERK-mediated unfolded protein response	BP	1814	1259	307	9	172
34620	GO:0036500	ATF6-mediated unfolded protein response	BP	1814	1259	307	9	172
34620	GO:0051788	response to misfolded protein	BP	1814	1259	307	9	172
34644	GO:0034644	cellular response to UV	BP	1814	1259	307	9	172
34644	GO:0009411	response to UV	BP	1814	1259	307	9	172
34644	GO:0010165	response to X-ray	BP	1814	1259	307	9	172
34644	GO:0010225	response to UV-C	BP	1814	1259	307	9	172
34644	GO:0010332	response to gamma radiation	BP	1814	1259	307	9	172
34644	GO:0070141	response to UV-A	BP	1814	1259	307	9	172
34644	GO:0071479	cellular response to ionizing radiation	BP	1814	1259	307	9	172
34644	GO:0071480	cellular response to gamma radiation	BP	1814	1259	307	9	172
34644	GO:0071481	cellular response to X-ray	BP	1814	1259	307	9	172
34763	GO:0034763	negative regulation of transmembrane transport	BP	1814	1259	307	3	172
34763	GO:0043271	negative regulation of ion transport	BP	1814	1259	307	3	172
34763	GO:0051048	negative regulation of secretion	BP	1814	1259	307	3	172
35019	GO:0035019	somatic stem cell population maintenance	BP	1814	1259	307	3	172
35019	GO:0019827	stem cell population maintenance	BP	1814	1259	307	3	172
35019	GO:0097150	neuronal stem cell population maintenance	BP	1814	1259	307	3	172
35112	GO:0035112	genitalia morphogenesis	BP	1814	1259	307	3	172
35112	GO:0030540	female genitalia development	BP	1814	1259	307	3	172
35112	GO:0060068	vagina development	BP	1814	1259	307	3	172
35914	GO:0035914	skeletal muscle cell differentiation	BP	1814	1259	307	3	172
35914	GO:0007517	muscle organ development	BP	1814	1259	307	3	172
35914	GO:0060538	skeletal muscle organ development	BP	1814	1259	307	3	172
40018	GO:0040018	positive regulation of multicellular organism growth	BP	1814	1259	307	4	172
40018	GO:0060045	positive regulation of cardiac muscle cell proliferation	BP	1814	1259	307	4	172
40018	GO:0060421	positive regulation of heart growth	BP	1814	1259	307	4	172
40018	GO:0061050	regulation of cell growth involved in cardiac muscle cell development	BP	1814	1259	307	4	172
42026	GO:0042026	protein refolding	BP	1814	1259	307	3	172
42026	GO:0051085	chaperone cofactor-dependent protein refolding	BP	1814	1259	307	3	172
42026	GO:0061077	chaperone-mediated protein folding	BP	1814	1259	307	3	172
42572	GO:0042572	retinol metabolic process	BP	1814	1259	307	13	172
42572	GO:0001523	retinoid metabolic process	BP	1814	1259	307	13	172
42572	GO:0002138	retinoic acid biosynthetic process	BP	1814	1259	307	13	172
42572	GO:0006068	ethanol catabolic process	BP	1814	1259	307	13	172
42572	GO:0006069	ethanol oxidation	BP	1814	1259	307	13	172
42572	GO:0006695	cholesterol biosynthetic process	BP	1814	1259	307	13	172
42572	GO:0008203	cholesterol metabolic process	BP	1814	1259	307	13	172
42572	GO:0008206	bile acid metabolic process	BP	1814	1259	307	13	172
42572	GO:0008207	C21-steroid hormone metabolic process	BP	1814	1259	307	13	172
42572	GO:0008210	estrogen metabolic process	BP	1814	1259	307	13	172
42572	GO:0016098	monoterpenoid metabolic process	BP	1814	1259	307	13	172
42572	GO:0042573	retinoic acid metabolic process	BP	1814	1259	307	13	172
42572	GO:0042574	retinal metabolic process	BP	1814	1259	307	13	172
42593	GO:0042593	glucose homeostasis	BP	1814	1259	307	4	172
42593	GO:0001678	cellular glucose homeostasis	BP	1814	1259	307	4	172
42593	GO:0051480	regulation of cytosolic calcium ion concentration	BP	1814	1259	307	4	172
42593	GO:0098771	inorganic ion homeostasis	BP	1814	1259	307	4	172
42733	GO:0042733	embryonic digit morphogenesis	BP	1814	1259	307	4	172
42733	GO:0030326	embryonic limb morphogenesis	BP	1814	1259	307	4	172
42733	GO:0035116	embryonic hindlimb morphogenesis	BP	1814	1259	307	4	172
42733	GO:0035136	forelimb morphogenesis	BP	1814	1259	307	4	172
42744	GO:0042744	hydrogen peroxide catabolic process	BP	1814	1259	307	4	172
42744	GO:0042743	hydrogen peroxide metabolic process	BP	1814	1259	307	4	172
42744	GO:0050665	hydrogen peroxide biosynthetic process	BP	1814	1259	307	4	172
42744	GO:1903409	reactive oxygen species biosynthetic process	BP	1814	1259	307	4	172
43065	GO:0043065	positive regulation of apoptotic process	BP	1814	1259	307	6	172
43065	GO:0043068	positive regulation of programmed cell death	BP	1814	1259	307	6	172
43065	GO:0043524	negative regulation of neuron apoptotic process	BP	1814	1259	307	6	172
43065	GO:0043525	positive regulation of neuron apoptotic process	BP	1814	1259	307	6	172
43065	GO:1901215	negative regulation of neuron death	BP	1814	1259	307	6	172
43065	GO:1901216	positive regulation of neuron death	BP	1814	1259	307	6	172
43066	GO:0043066	negative regulation of apoptotic process	BP	1814	1259	307	3	172
43066	GO:0042981	regulation of apoptotic process	BP	1814	1259	307	3	172
43066	GO:0060548	negative regulation of cell death	BP	1814	1259	307	3	172
43154	GO:0043154	negative regulation of cysteine-type endopeptidase activity involved in apoptotic process	BP	1814	1259	307	3	172
43154	GO:0006919	activation of cysteine-type endopeptidase activity involved in apoptotic process	BP	1814	1259	307	3	172
43154	GO:0043280	positive regulation of cysteine-type endopeptidase activity involved in apoptotic process	BP	1814	1259	307	3	172
43518	GO:0043518	negative regulation of DNA damage response, signal transduction by p53 class mediator	BP	1814	1259	307	5	172
43518	GO:0043517	positive regulation of DNA damage response, signal transduction by p53 class mediator	BP	1814	1259	307	5	172
43518	GO:1902166	negative regulation of intrinsic apoptotic signaling pathway in response to DNA damage by p53 class mediator	BP	1814	1259	307	5	172
43518	GO:1902230	negative regulation of intrinsic apoptotic signaling pathway in response to DNA damage	BP	1814	1259	307	5	172
43518	GO:1902254	negative regulation of intrinsic apoptotic signaling pathway by p53 class mediator	BP	1814	1259	307	5	172
43536	GO:0043536	positive regulation of blood vessel endothelial cell migration	BP	1814	1259	307	8	172
43536	GO:0010595	positive regulation of endothelial cell migration	BP	1814	1259	307	8	172
43536	GO:0010634	positive regulation of epithelial cell migration	BP	1814	1259	307	8	172
43536	GO:0036324	vascular endothelial growth factor receptor-2 signaling pathway	BP	1814	1259	307	8	172
43536	GO:0038033	positive regulation of endothelial cell chemotaxis by VEGF-activated vascular endothelial growth factor receptor signaling pathway	BP	1814	1259	307	8	172
43536	GO:0043537	negative regulation of blood vessel endothelial cell migration	BP	1814	1259	307	8	172
43536	GO:0090049	regulation of cell migration involved in sprouting angiogenesis	BP	1814	1259	307	8	172
43536	GO:0090050	positive regulation of cell migration involved in sprouting angiogenesis	BP	1814	1259	307	8	172
43666	GO:0043666	regulation of phosphoprotein phosphatase activity	BP	1814	1259	307	3	172
43666	GO:0010922	positive regulation of phosphatase activity	BP	1814	1259	307	3	172
43666	GO:0035307	positive regulation of protein dephosphorylation	BP	1814	1259	307	3	172
43691	GO:0043691	reverse cholesterol transport	BP	1814	1259	307	3	172
43691	GO:0030299	intestinal cholesterol absorption	BP	1814	1259	307	3	172
43691	GO:0090118	receptor-mediated endocytosis involved in cholesterol transport	BP	1814	1259	307	3	172
43922	GO:0043922	negative regulation by host of viral transcription	BP	1814	1259	307	4	172
43922	GO:0043923	positive regulation by host of viral transcription	BP	1814	1259	307	4	172
43922	GO:0044793	negative regulation by host of viral process	BP	1814	1259	307	4	172
43922	GO:0044827	modulation by host of viral genome replication	BP	1814	1259	307	4	172
44000	GO:0044000	movement in host	BP	1814	1259	307	7	172
44000	GO:0019076	viral release from host cell	BP	1814	1259	307	7	172
44000	GO:0046718	viral entry into host cell	BP	1814	1259	307	7	172
44000	GO:0046761	viral budding from plasma membrane	BP	1814	1259	307	7	172
44000	GO:0046813	receptor-mediated virion attachment to host cell	BP	1814	1259	307	7	172
44000	GO:0051701	biological process involved in interaction with host	BP	1814	1259	307	7	172
44000	GO:0051702	biological process involved in interaction with symbiont	BP	1814	1259	307	7	172
44597	GO:0044597	daunorubicin metabolic process	BP	1814	1259	307	3	172
44597	GO:0042182	ketone catabolic process	BP	1814	1259	307	3	172
44597	GO:0044598	doxorubicin metabolic process	BP	1814	1259	307	3	172
45087	GO:0045087	innate immune response	BP	1814	1259	307	3	172
45087	GO:0009617	response to bacterium	BP	1814	1259	307	3	172
45087	GO:0042742	defense response to bacterium	BP	1814	1259	307	3	172
45471	GO:0045471	response to ethanol	BP	1814	1259	307	4	172
45471	GO:0071361	cellular response to ethanol	BP	1814	1259	307	4	172
45471	GO:0071380	cellular response to prostaglandin E stimulus	BP	1814	1259	307	4	172
45471	GO:0097306	cellular response to alcohol	BP	1814	1259	307	4	172
45582	GO:0045582	positive regulation of T cell differentiation	BP	1814	1259	307	20	172
45582	GO:0001953	negative regulation of cell-matrix adhesion	BP	1814	1259	307	20	172
45582	GO:0001954	positive regulation of cell-matrix adhesion	BP	1814	1259	307	20	172
45582	GO:0002762	negative regulation of myeloid leukocyte differentiation	BP	1814	1259	307	20	172
45582	GO:0010811	positive regulation of cell-substrate adhesion	BP	1814	1259	307	20	172
45582	GO:0022408	negative regulation of cell-cell adhesion	BP	1814	1259	307	20	172
45582	GO:0031295	T cell costimulation	BP	1814	1259	307	20	172
45582	GO:0033088	negative regulation of immature T cell proliferation in thymus	BP	1814	1259	307	20	172
45582	GO:0033092	positive regulation of immature T cell proliferation in thymus	BP	1814	1259	307	20	172
45582	GO:0043371	negative regulation of CD4-positive, alpha-beta T cell differentiation	BP	1814	1259	307	20	172
45582	GO:0045619	regulation of lymphocyte differentiation	BP	1814	1259	307	20	172
45582	GO:0045620	negative regulation of lymphocyte differentiation	BP	1814	1259	307	20	172
45582	GO:0045621	positive regulation of lymphocyte differentiation	BP	1814	1259	307	20	172
45582	GO:0045630	positive regulation of T-helper 2 cell differentiation	BP	1814	1259	307	20	172
45582	GO:0045671	negative regulation of osteoclast differentiation	BP	1814	1259	307	20	172
45582	GO:0050864	regulation of B cell activation	BP	1814	1259	307	20	172
45582	GO:0050868	negative regulation of T cell activation	BP	1814	1259	307	20	172
45582	GO:0050870	positive regulation of T cell activation	BP	1814	1259	307	20	172
45582	GO:2000320	negative regulation of T-helper 17 cell differentiation	BP	1814	1259	307	20	172
45582	GO:2000553	positive regulation of T-helper 2 cell cytokine production	BP	1814	1259	307	20	172
45597	GO:0045597	positive regulation of cell differentiation	BP	1814	1259	307	7	172
45597	GO:0010720	positive regulation of cell development	BP	1814	1259	307	7	172
45597	GO:0045596	negative regulation of cell differentiation	BP	1814	1259	307	7	172
45597	GO:0045686	negative regulation of glial cell differentiation	BP	1814	1259	307	7	172
45597	GO:0050767	regulation of neurogenesis	BP	1814	1259	307	7	172
45597	GO:0050768	negative regulation of neurogenesis	BP	1814	1259	307	7	172
45597	GO:0050772	positive regulation of axonogenesis	BP	1814	1259	307	7	172
45648	GO:0045648	positive regulation of erythrocyte differentiation	BP	1814	1259	307	6	172
45648	GO:0030854	positive regulation of granulocyte differentiation	BP	1814	1259	307	6	172
45648	GO:0045638	negative regulation of myeloid cell differentiation	BP	1814	1259	307	6	172
45648	GO:0045646	regulation of erythrocyte differentiation	BP	1814	1259	307	6	172
45648	GO:0045651	positive regulation of macrophage differentiation	BP	1814	1259	307	6	172
45648	GO:0045672	positive regulation of osteoclast differentiation	BP	1814	1259	307	6	172
45666	GO:0045666	positive regulation of neuron differentiation	BP	1814	1259	307	3	172
45666	GO:0045665	negative regulation of neuron differentiation	BP	1814	1259	307	3	172
45666	GO:1904338	regulation of dopaminergic neuron differentiation	BP	1814	1259	307	3	172
45727	GO:0045727	positive regulation of translation	BP	1814	1259	307	6	172
45727	GO:0034250	positive regulation of amide metabolic process	BP	1814	1259	307	6	172
45727	GO:0045948	positive regulation of translational initiation	BP	1814	1259	307	6	172
45727	GO:1902004	positive regulation of amyloid-beta formation	BP	1814	1259	307	6	172
45727	GO:1904688	regulation of cytoplasmic translational initiation	BP	1814	1259	307	6	172
45727	GO:2000767	positive regulation of cytoplasmic translation	BP	1814	1259	307	6	172
45736	GO:0045736	negative regulation of cyclin-dependent protein serine/threonine kinase activity	BP	1814	1259	307	12	172
45736	GO:0000077	DNA damage checkpoint signaling	BP	1814	1259	307	12	172
45736	GO:0001933	negative regulation of protein phosphorylation	BP	1814	1259	307	12	172
45736	GO:0006469	negative regulation of protein kinase activity	BP	1814	1259	307	12	172
45736	GO:0007095	mitotic G2 DNA damage checkpoint signaling	BP	1814	1259	307	12	172
45736	GO:0010948	negative regulation of cell cycle process	BP	1814	1259	307	12	172
45736	GO:0030330	DNA damage response, signal transduction by p53 class mediator	BP	1814	1259	307	12	172
45736	GO:0033673	negative regulation of kinase activity	BP	1814	1259	307	12	172
45736	GO:0045737	positive regulation of cyclin-dependent protein serine/threonine kinase activity	BP	1814	1259	307	12	172
45736	GO:0045936	negative regulation of phosphate metabolic process	BP	1814	1259	307	12	172
45736	GO:0071901	negative regulation of protein serine/threonine kinase activity	BP	1814	1259	307	12	172
45736	GO:0072332	intrinsic apoptotic signaling pathway by p53 class mediator	BP	1814	1259	307	12	172
45766	GO:0045766	positive regulation of angiogenesis	BP	1814	1259	307	3	172
45766	GO:0016525	negative regulation of angiogenesis	BP	1814	1259	307	3	172
45766	GO:1903672	positive regulation of sprouting angiogenesis	BP	1814	1259	307	3	172
45821	GO:0045821	positive regulation of glycolytic process	BP	1814	1259	307	15	172
45821	GO:0002082	regulation of oxidative phosphorylation	BP	1814	1259	307	15	172
45821	GO:0006110	regulation of glycolytic process	BP	1814	1259	307	15	172
45821	GO:0043456	regulation of pentose-phosphate shunt	BP	1814	1259	307	15	172
45821	GO:0043457	regulation of cellular respiration	BP	1814	1259	307	15	172
45821	GO:0045719	negative regulation of glycogen biosynthetic process	BP	1814	1259	307	15	172
45821	GO:0045721	negative regulation of gluconeogenesis	BP	1814	1259	307	15	172
45821	GO:0045722	positive regulation of gluconeogenesis	BP	1814	1259	307	15	172
45821	GO:0045725	positive regulation of glycogen biosynthetic process	BP	1814	1259	307	15	172
45821	GO:0045820	negative regulation of glycolytic process	BP	1814	1259	307	15	172
45821	GO:0090324	negative regulation of oxidative phosphorylation	BP	1814	1259	307	15	172
45821	GO:1900125	regulation of hyaluronan biosynthetic process	BP	1814	1259	307	15	172
45821	GO:1901857	positive regulation of cellular respiration	BP	1814	1259	307	15	172
45821	GO:1902956	regulation of mitochondrial electron transport, NADH to ubiquinone	BP	1814	1259	307	15	172
45821	GO:2001171	positive regulation of ATP biosynthetic process	BP	1814	1259	307	15	172
46185	GO:0046185	aldehyde catabolic process	BP	1814	1259	307	3	172
46185	GO:0009438	methylglyoxal metabolic process	BP	1814	1259	307	3	172
46185	GO:0019682	glyceraldehyde-3-phosphate metabolic process	BP	1814	1259	307	3	172
46496	GO:0046496	nicotinamide nucleotide metabolic process	BP	1814	1259	307	3	172
46496	GO:0006734	NADH metabolic process	BP	1814	1259	307	3	172
46496	GO:0009052	pentose-phosphate shunt, non-oxidative branch	BP	1814	1259	307	3	172
46825	GO:0046825	regulation of protein export from nucleus	BP	1814	1259	307	4	172
46825	GO:1903214	regulation of protein targeting to mitochondrion	BP	1814	1259	307	4	172
46825	GO:1903748	negative regulation of establishment of protein localization to mitochondrion	BP	1814	1259	307	4	172
46825	GO:1903955	positive regulation of protein targeting to mitochondrion	BP	1814	1259	307	4	172
48525	GO:0048525	negative regulation of viral process	BP	1814	1259	307	7	172
48525	GO:0032897	negative regulation of viral transcription	BP	1814	1259	307	7	172
48525	GO:0045069	regulation of viral genome replication	BP	1814	1259	307	7	172
48525	GO:0045070	positive regulation of viral genome replication	BP	1814	1259	307	7	172
48525	GO:0045869	negative regulation of single stranded viral RNA replication via double stranded DNA intermediate	BP	1814	1259	307	7	172
48525	GO:0046598	positive regulation of viral entry into host cell	BP	1814	1259	307	7	172
48525	GO:1903900	regulation of viral life cycle	BP	1814	1259	307	7	172
48538	GO:0048538	thymus development	BP	1814	1259	307	4	172
48538	GO:0016445	somatic diversification of immunoglobulins	BP	1814	1259	307	4	172
48538	GO:0033151	V(D)J recombination	BP	1814	1259	307	4	172
48538	GO:0045190	isotype switching	BP	1814	1259	307	4	172
48546	GO:0048546	digestive tract morphogenesis	BP	1814	1259	307	4	172
48546	GO:0007440	foregut morphogenesis	BP	1814	1259	307	4	172
48546	GO:0007494	midgut development	BP	1814	1259	307	4	172
48546	GO:0048566	embryonic digestive tract development	BP	1814	1259	307	4	172
48661	GO:0048661	positive regulation of smooth muscle cell proliferation	BP	1814	1259	307	4	172
48661	GO:0048662	negative regulation of smooth muscle cell proliferation	BP	1814	1259	307	4	172
48661	GO:1904706	negative regulation of vascular associated smooth muscle cell proliferation	BP	1814	1259	307	4	172
48661	GO:1904707	positive regulation of vascular associated smooth muscle cell proliferation	BP	1814	1259	307	4	172
48663	GO:0048663	neuron fate commitment	BP	1814	1259	307	3	172
48663	GO:0001708	cell fate specification	BP	1814	1259	307	3	172
48663	GO:0001709	cell fate determination	BP	1814	1259	307	3	172
48709	GO:0048709	oligodendrocyte differentiation	BP	1814	1259	307	4	172
48709	GO:0014002	astrocyte development	BP	1814	1259	307	4	172
48709	GO:0022011	myelination in peripheral nervous system	BP	1814	1259	307	4	172
48709	GO:0060020	Bergmann glial cell differentiation	BP	1814	1259	307	4	172
50729	GO:0050729	positive regulation of inflammatory response	BP	1814	1259	307	5	172
50729	GO:0002218	activation of innate immune response	BP	1814	1259	307	5	172
50729	GO:0045088	regulation of innate immune response	BP	1814	1259	307	5	172
50729	GO:0050727	regulation of inflammatory response	BP	1814	1259	307	5	172
50729	GO:0050728	negative regulation of inflammatory response	BP	1814	1259	307	5	172
50731	GO:0050731	positive regulation of peptidyl-tyrosine phosphorylation	BP	1814	1259	307	7	172
50731	GO:0001934	positive regulation of protein phosphorylation	BP	1814	1259	307	7	172
50731	GO:0007176	regulation of epidermal growth factor-activated receptor activity	BP	1814	1259	307	7	172
50731	GO:0033674	positive regulation of kinase activity	BP	1814	1259	307	7	172
50731	GO:0042531	positive regulation of tyrosine phosphorylation of STAT protein	BP	1814	1259	307	7	172
50731	GO:0045860	positive regulation of protein kinase activity	BP	1814	1259	307	7	172
50731	GO:0061098	positive regulation of protein tyrosine kinase activity	BP	1814	1259	307	7	172
50777	GO:0050777	negative regulation of immune response	BP	1814	1259	307	3	172
50777	GO:0050778	positive regulation of immune response	BP	1814	1259	307	3	172
50777	GO:1903707	negative regulation of hemopoiesis	BP	1814	1259	307	3	172
51092	GO:0051092	positive regulation of NF-kappaB transcription factor activity	BP	1814	1259	307	6	172
51092	GO:0032088	negative regulation of NF-kappaB transcription factor activity	BP	1814	1259	307	6	172
51092	GO:0042994	cytoplasmic sequestering of transcription factor	BP	1814	1259	307	6	172
51092	GO:0043433	negative regulation of DNA-binding transcription factor activity	BP	1814	1259	307	6	172
51092	GO:0051091	positive regulation of DNA-binding transcription factor activity	BP	1814	1259	307	6	172
51092	GO:0072595	maintenance of protein localization in organelle	BP	1814	1259	307	6	172
51281	GO:0051281	positive regulation of release of sequestered calcium ion into cytosol	BP	1814	1259	307	4	172
51281	GO:0031585	regulation of inositol 1,4,5-trisphosphate-sensitive calcium-release channel activity	BP	1814	1259	307	4	172
51281	GO:0051279	regulation of release of sequestered calcium ion into cytosol	BP	1814	1259	307	4	172
51281	GO:0051928	positive regulation of calcium ion transport	BP	1814	1259	307	4	172
51354	GO:0051354	negative regulation of oxidoreductase activity	BP	1814	1259	307	8	172
51354	GO:0032770	positive regulation of monooxygenase activity	BP	1814	1259	307	8	172
51354	GO:0033864	positive regulation of NAD(P)H oxidase activity	BP	1814	1259	307	8	172
51354	GO:0051000	positive regulation of nitric-oxide synthase activity	BP	1814	1259	307	8	172
51354	GO:0051353	positive regulation of oxidoreductase activity	BP	1814	1259	307	8	172
51354	GO:0060558	regulation of calcidiol 1-monooxygenase activity	BP	1814	1259	307	8	172
51354	GO:1901668	regulation of superoxide dismutase activity	BP	1814	1259	307	8	172
51354	GO:1904959	regulation of cytochrome-c oxidase activity	BP	1814	1259	307	8	172
51403	GO:0051403	stress-activated MAPK cascade	BP	1814	1259	307	4	172
51403	GO:0007254	JNK cascade	BP	1814	1259	307	4	172
51403	GO:0038066	p38MAPK cascade	BP	1814	1259	307	4	172
51403	GO:0070371	ERK1 and ERK2 cascade	BP	1814	1259	307	4	172
51571	GO:0051571	positive regulation of histone H3-K4 methylation	BP	1814	1259	307	20	172
51571	GO:0031058	positive regulation of histone modification	BP	1814	1259	307	20	172
51571	GO:0031062	positive regulation of histone methylation	BP	1814	1259	307	20	172
51571	GO:0031064	negative regulation of histone deacetylation	BP	1814	1259	307	20	172
51571	GO:0031065	positive regulation of histone deacetylation	BP	1814	1259	307	20	172
51571	GO:0035065	regulation of histone acetylation	BP	1814	1259	307	20	172
51571	GO:0035066	positive regulation of histone acetylation	BP	1814	1259	307	20	172
51571	GO:0035067	negative regulation of histone acetylation	BP	1814	1259	307	20	172
51571	GO:0051572	negative regulation of histone H3-K4 methylation	BP	1814	1259	307	20	172
51571	GO:0051573	negative regulation of histone H3-K9 methylation	BP	1814	1259	307	20	172
51571	GO:0090043	regulation of tubulin deacetylation	BP	1814	1259	307	20	172
51571	GO:0090240	positive regulation of histone H4 acetylation	BP	1814	1259	307	20	172
51571	GO:0090241	negative regulation of histone H4 acetylation	BP	1814	1259	307	20	172
51571	GO:1900113	negative regulation of histone H3-K9 trimethylation	BP	1814	1259	307	20	172
51571	GO:1901727	positive regulation of histone deacetylase activity	BP	1814	1259	307	20	172
51571	GO:1901984	negative regulation of protein acetylation	BP	1814	1259	307	20	172
51571	GO:1901985	positive regulation of protein acetylation	BP	1814	1259	307	20	172
51571	GO:2000617	positive regulation of histone H3-K9 acetylation	BP	1814	1259	307	20	172
51571	GO:2000618	regulation of histone H4-K16 acetylation	BP	1814	1259	307	20	172
51571	GO:2000758	positive regulation of peptidyl-lysine acetylation	BP	1814	1259	307	20	172
55089	GO:0055089	fatty acid homeostasis	BP	1814	1259	307	4	172
55089	GO:0035356	cellular triglyceride homeostasis	BP	1814	1259	307	4	172
55089	GO:0042632	cholesterol homeostasis	BP	1814	1259	307	4	172
55089	GO:0070328	triglyceride homeostasis	BP	1814	1259	307	4	172
60252	GO:0060252	positive regulation of glial cell proliferation	BP	1814	1259	307	4	172
60252	GO:0048711	positive regulation of astrocyte differentiation	BP	1814	1259	307	4	172
60252	GO:0048714	positive regulation of oligodendrocyte differentiation	BP	1814	1259	307	4	172
60252	GO:0060253	negative regulation of glial cell proliferation	BP	1814	1259	307	4	172
60412	GO:0060412	ventricular septum morphogenesis	BP	1814	1259	307	7	172
60412	GO:0001947	heart looping	BP	1814	1259	307	7	172
60412	GO:0003151	outflow tract morphogenesis	BP	1814	1259	307	7	172
60412	GO:0003209	cardiac atrium morphogenesis	BP	1814	1259	307	7	172
60412	GO:0003215	cardiac right ventricle morphogenesis	BP	1814	1259	307	7	172
60412	GO:0003222	ventricular trabecula myocardium morphogenesis	BP	1814	1259	307	7	172
60412	GO:0060347	heart trabecula formation	BP	1814	1259	307	7	172
60612	GO:0060612	adipose tissue development	BP	1814	1259	307	3	172
60612	GO:0002062	chondrocyte differentiation	BP	1814	1259	307	3	172
60612	GO:0051216	cartilage development	BP	1814	1259	307	3	172
60742	GO:0060742	epithelial cell differentiation involved in prostate gland development	BP	1814	1259	307	4	172
60742	GO:0060513	prostatic bud formation	BP	1814	1259	307	4	172
60742	GO:0060525	prostate glandular acinus development	BP	1814	1259	307	4	172
60742	GO:0060736	prostate gland growth	BP	1814	1259	307	4	172
60766	GO:0060766	negative regulation of androgen receptor signaling pathway	BP	1814	1259	307	5	172
60766	GO:0033147	negative regulation of intracellular estrogen receptor signaling pathway	BP	1814	1259	307	5	172
60766	GO:0033148	positive regulation of intracellular estrogen receptor signaling pathway	BP	1814	1259	307	5	172
60766	GO:0060765	regulation of androgen receptor signaling pathway	BP	1814	1259	307	5	172
60766	GO:2000323	negative regulation of glucocorticoid receptor signaling pathway	BP	1814	1259	307	5	172
60923	GO:0060923	cardiac muscle cell fate commitment	BP	1814	1259	307	6	172
60923	GO:0048738	cardiac muscle tissue development	BP	1814	1259	307	6	172
60923	GO:0055003	cardiac myofibril assembly	BP	1814	1259	307	6	172
60923	GO:0055007	cardiac muscle cell differentiation	BP	1814	1259	307	6	172
60923	GO:0055012	ventricular cardiac muscle cell differentiation	BP	1814	1259	307	6	172
60923	GO:0055013	cardiac muscle cell development	BP	1814	1259	307	6	172
6094	GO:0006094	gluconeogenesis	BP	1814	1259	307	4	172
6094	GO:0006000	fructose metabolic process	BP	1814	1259	307	4	172
6094	GO:0006006	glucose metabolic process	BP	1814	1259	307	4	172
6094	GO:0046364	monosaccharide biosynthetic process	BP	1814	1259	307	4	172
60986	GO:0060986	endocrine hormone secretion	BP	1814	1259	307	3	172
60986	GO:0001990	regulation of systemic arterial blood pressure by hormone	BP	1814	1259	307	3	172
60986	GO:0046879	hormone secretion	BP	1814	1259	307	3	172
6099	GO:0006099	tricarboxylic acid cycle	BP	1814	1259	307	3	172
6099	GO:0009060	aerobic respiration	BP	1814	1259	307	3	172
6099	GO:0022904	respiratory electron transport chain	BP	1814	1259	307	3	172
6107	GO:0006107	oxaloacetate metabolic process	BP	1814	1259	307	3	172
6107	GO:0006536	glutamate metabolic process	BP	1814	1259	307	3	172
6107	GO:0009065	glutamine family amino acid catabolic process	BP	1814	1259	307	3	172
61644	GO:0061644	protein localization to CENP-A containing chromatin	BP	1814	1259	307	4	172
61644	GO:0070198	protein localization to chromosome, telomeric region	BP	1814	1259	307	4	172
61644	GO:0070200	establishment of protein localization to telomere	BP	1814	1259	307	4	172
61644	GO:0071168	protein localization to chromatin	BP	1814	1259	307	4	172
61900	GO:0061900	glial cell activation	BP	1814	1259	307	3	172
61900	GO:0001774	microglial cell activation	BP	1814	1259	307	3	172
61900	GO:0048143	astrocyte activation	BP	1814	1259	307	3	172
62013	GO:0062013	positive regulation of small molecule metabolic process	BP	1814	1259	307	7	172
62013	GO:0006111	regulation of gluconeogenesis	BP	1814	1259	307	7	172
62013	GO:0006140	regulation of nucleotide metabolic process	BP	1814	1259	307	7	172
62013	GO:0010565	regulation of cellular ketone metabolic process	BP	1814	1259	307	7	172
62013	GO:0010906	regulation of glucose metabolic process	BP	1814	1259	307	7	172
62013	GO:0045913	positive regulation of carbohydrate metabolic process	BP	1814	1259	307	7	172
62013	GO:1902930	regulation of alcohol biosynthetic process	BP	1814	1259	307	7	172
6281	GO:0006281	DNA repair	BP	1814	1259	307	5	172
6281	GO:0000724	double-strand break repair via homologous recombination	BP	1814	1259	307	5	172
6281	GO:0000729	DNA double-strand break processing	BP	1814	1259	307	5	172
6281	GO:0006260	DNA replication	BP	1814	1259	307	5	172
6281	GO:0006303	double-strand break repair via nonhomologous end joining	BP	1814	1259	307	5	172
6306	GO:0006306	DNA methylation	BP	1814	1259	307	3	172
6306	GO:0016571	histone methylation	BP	1814	1259	307	3	172
6306	GO:0032776	DNA methylation on cytosine	BP	1814	1259	307	3	172
6337	GO:0006337	nucleosome disassembly	BP	1814	1259	307	4	172
6337	GO:0000045	autophagosome assembly	BP	1814	1259	307	4	172
6337	GO:0065004	protein-DNA complex assembly	BP	1814	1259	307	4	172
6337	GO:0097352	autophagosome maturation	BP	1814	1259	307	4	172
6346	GO:0006346	DNA methylation-dependent heterochromatin formation	BP	1814	1259	307	8	172
6346	GO:0000183	rDNA heterochromatin formation	BP	1814	1259	307	8	172
6346	GO:0009048	dosage compensation by inactivation of X chromosome	BP	1814	1259	307	8	172
6346	GO:0031507	heterochromatin formation	BP	1814	1259	307	8	172
6346	GO:0031509	subtelomeric heterochromatin formation	BP	1814	1259	307	8	172
6346	GO:0045814	negative regulation of gene expression, epigenetic	BP	1814	1259	307	8	172
6346	GO:0045815	transcription initiation-coupled chromatin remodeling	BP	1814	1259	307	8	172
6346	GO:0071514	genomic imprinting	BP	1814	1259	307	8	172
6390	GO:0006390	mitochondrial transcription	BP	1814	1259	307	3	172
6390	GO:0000965	mitochondrial RNA 3'-end processing	BP	1814	1259	307	3	172
6390	GO:0070127	tRNA aminoacylation for mitochondrial protein translation	BP	1814	1259	307	3	172
6545	GO:0006545	glycine biosynthetic process	BP	1814	1259	307	4	172
6545	GO:0006563	L-serine metabolic process	BP	1814	1259	307	4	172
6545	GO:0009071	serine family amino acid catabolic process	BP	1814	1259	307	4	172
6545	GO:1901607	alpha-amino acid biosynthetic process	BP	1814	1259	307	4	172
6606	GO:0006606	protein import into nucleus	BP	1814	1259	307	4	172
6606	GO:0045040	protein insertion into mitochondrial outer membrane	BP	1814	1259	307	4	172
6606	GO:0072655	establishment of protein localization to mitochondrion	BP	1814	1259	307	4	172
6606	GO:0072656	maintenance of protein location in mitochondrion	BP	1814	1259	307	4	172
6635	GO:0006635	fatty acid beta-oxidation	BP	1814	1259	307	13	172
6635	GO:0001676	long-chain fatty acid metabolic process	BP	1814	1259	307	13	172
6635	GO:0006633	fatty acid biosynthetic process	BP	1814	1259	307	13	172
6635	GO:0008652	amino acid biosynthetic process	BP	1814	1259	307	13	172
6635	GO:0009063	amino acid catabolic process	BP	1814	1259	307	13	172
6635	GO:0010430	fatty acid omega-oxidation	BP	1814	1259	307	13	172
6635	GO:0019626	short-chain fatty acid catabolic process	BP	1814	1259	307	13	172
6635	GO:0033539	fatty acid beta-oxidation using acyl-CoA dehydrogenase	BP	1814	1259	307	13	172
6635	GO:0033540	fatty acid beta-oxidation using acyl-CoA oxidase	BP	1814	1259	307	13	172
6635	GO:0034440	lipid oxidation	BP	1814	1259	307	13	172
6635	GO:0042759	long-chain fatty acid biosynthetic process	BP	1814	1259	307	13	172
6635	GO:0042760	very long-chain fatty acid catabolic process	BP	1814	1259	307	13	172
6635	GO:1901606	alpha-amino acid catabolic process	BP	1814	1259	307	13	172
6641	GO:0006641	triglyceride metabolic process	BP	1814	1259	307	3	172
6641	GO:0019432	triglyceride biosynthetic process	BP	1814	1259	307	3	172
6641	GO:0019433	triglyceride catabolic process	BP	1814	1259	307	3	172
6693	GO:0006693	prostaglandin metabolic process	BP	1814	1259	307	3	172
6693	GO:0019369	arachidonic acid metabolic process	BP	1814	1259	307	3	172
6693	GO:0046456	icosanoid biosynthetic process	BP	1814	1259	307	3	172
7004	GO:0007004	telomere maintenance via telomerase	BP	1814	1259	307	7	172
7004	GO:0000723	telomere maintenance	BP	1814	1259	307	7	172
7004	GO:0000731	DNA synthesis involved in DNA repair	BP	1814	1259	307	7	172
7004	GO:0016233	telomere capping	BP	1814	1259	307	7	172
7004	GO:0032201	telomere maintenance via semi-conservative replication	BP	1814	1259	307	7	172
7004	GO:0043247	telomere maintenance in response to DNA damage	BP	1814	1259	307	7	172
7004	GO:0061820	telomeric D-loop disassembly	BP	1814	1259	307	7	172
70059	GO:0070059	intrinsic apoptotic signaling pathway in response to endoplasmic reticulum stress	BP	1814	1259	307	10	172
70059	GO:0006977	DNA damage response, signal transduction by p53 class mediator resulting in cell cycle arrest	BP	1814	1259	307	10	172
70059	GO:0006978	DNA damage response, signal transduction by p53 class mediator resulting in transcription of p21 class mediator	BP	1814	1259	307	10	172
70059	GO:0008630	intrinsic apoptotic signaling pathway in response to DNA damage	BP	1814	1259	307	10	172
70059	GO:0008631	intrinsic apoptotic signaling pathway in response to oxidative stress	BP	1814	1259	307	10	172
70059	GO:0031571	mitotic G1 DNA damage checkpoint signaling	BP	1814	1259	307	10	172
70059	GO:0036481	intrinsic apoptotic signaling pathway in response to hydrogen peroxide	BP	1814	1259	307	10	172
70059	GO:0042771	intrinsic apoptotic signaling pathway in response to DNA damage by p53 class mediator	BP	1814	1259	307	10	172
70059	GO:0097191	extrinsic apoptotic signaling pathway	BP	1814	1259	307	10	172
70059	GO:0097193	intrinsic apoptotic signaling pathway	BP	1814	1259	307	10	172
70301	GO:0070301	cellular response to hydrogen peroxide	BP	1814	1259	307	9	172
70301	GO:0010038	response to metal ion	BP	1814	1259	307	9	172
70301	GO:0019430	removal of superoxide radicals	BP	1814	1259	307	9	172
70301	GO:0034599	cellular response to oxidative stress	BP	1814	1259	307	9	172
70301	GO:0034614	cellular response to reactive oxygen species	BP	1814	1259	307	9	172
70301	GO:0042542	response to hydrogen peroxide	BP	1814	1259	307	9	172
70301	GO:0042554	superoxide anion generation	BP	1814	1259	307	9	172
70301	GO:0051592	response to calcium ion	BP	1814	1259	307	9	172
70301	GO:0098869	cellular oxidant detoxification	BP	1814	1259	307	9	172
70374	GO:0070374	positive regulation of ERK1 and ERK2 cascade	BP	1814	1259	307	14	172
70374	GO:0032872	regulation of stress-activated MAPK cascade	BP	1814	1259	307	14	172
70374	GO:0043405	regulation of MAP kinase activity	BP	1814	1259	307	14	172
70374	GO:0043406	positive regulation of MAP kinase activity	BP	1814	1259	307	14	172
70374	GO:0043407	negative regulation of MAP kinase activity	BP	1814	1259	307	14	172
70374	GO:0043410	positive regulation of MAPK cascade	BP	1814	1259	307	14	172
70374	GO:0043507	positive regulation of JUN kinase activity	BP	1814	1259	307	14	172
70374	GO:0046329	negative regulation of JNK cascade	BP	1814	1259	307	14	172
70374	GO:0046330	positive regulation of JNK cascade	BP	1814	1259	307	14	172
70374	GO:0070372	regulation of ERK1 and ERK2 cascade	BP	1814	1259	307	14	172
70374	GO:0070373	negative regulation of ERK1 and ERK2 cascade	BP	1814	1259	307	14	172
70374	GO:0071902	positive regulation of protein serine/threonine kinase activity	BP	1814	1259	307	14	172
70374	GO:1900745	positive regulation of p38MAPK cascade	BP	1814	1259	307	14	172
70374	GO:2001020	regulation of response to DNA damage stimulus	BP	1814	1259	307	14	172
70427	GO:0070427	nucleotide-binding oligomerization domain containing 1 signaling pathway	BP	1814	1259	307	3	172
70427	GO:0034162	toll-like receptor 9 signaling pathway	BP	1814	1259	307	3	172
70427	GO:0070431	nucleotide-binding oligomerization domain containing 2 signaling pathway	BP	1814	1259	307	3	172
7062	GO:0007062	sister chromatid cohesion	BP	1814	1259	307	3	172
7062	GO:0007064	mitotic sister chromatid cohesion	BP	1814	1259	307	3	172
7062	GO:0007080	mitotic metaphase plate congression	BP	1814	1259	307	3	172
71222	GO:0071222	cellular response to lipopolysaccharide	BP	1814	1259	307	6	172
71222	GO:0031663	lipopolysaccharide-mediated signaling pathway	BP	1814	1259	307	6	172
71222	GO:0032496	response to lipopolysaccharide	BP	1814	1259	307	6	172
71222	GO:0071223	cellular response to lipoteichoic acid	BP	1814	1259	307	6	172
71222	GO:0071224	cellular response to peptidoglycan	BP	1814	1259	307	6	172
71222	GO:0071396	cellular response to lipid	BP	1814	1259	307	6	172
71230	GO:0071230	cellular response to amino acid stimulus	BP	1814	1259	307	3	172
71230	GO:0043200	response to amino acid	BP	1814	1259	307	3	172
71230	GO:0051599	response to hydrostatic pressure	BP	1814	1259	307	3	172
71385	GO:0071385	cellular response to glucocorticoid stimulus	BP	1814	1259	307	10	172
71385	GO:0030520	intracellular estrogen receptor signaling pathway	BP	1814	1259	307	10	172
71385	GO:0030521	androgen receptor signaling pathway	BP	1814	1259	307	10	172
71385	GO:0031960	response to corticosteroid	BP	1814	1259	307	10	172
71385	GO:0042921	glucocorticoid receptor signaling pathway	BP	1814	1259	307	10	172
71385	GO:0043401	steroid hormone mediated signaling pathway	BP	1814	1259	307	10	172
71385	GO:0050847	progesterone receptor signaling pathway	BP	1814	1259	307	10	172
71385	GO:0051385	response to mineralocorticoid	BP	1814	1259	307	10	172
71385	GO:0071548	response to dexamethasone	BP	1814	1259	307	10	172
71385	GO:0071549	cellular response to dexamethasone stimulus	BP	1814	1259	307	10	172
71456	GO:0071456	cellular response to hypoxia	BP	1814	1259	307	11	172
71456	GO:0001666	response to hypoxia	BP	1814	1259	307	11	172
71456	GO:0036091	positive regulation of transcription from RNA polymerase II promoter in response to oxidative stress	BP	1814	1259	307	11	172
71456	GO:0043619	regulation of transcription from RNA polymerase II promoter in response to oxidative stress	BP	1814	1259	307	11	172
71456	GO:0055093	response to hyperoxia	BP	1814	1259	307	11	172
71456	GO:0061418	regulation of transcription from RNA polymerase II promoter in response to hypoxia	BP	1814	1259	307	11	172
71456	GO:0061419	positive regulation of transcription from RNA polymerase II promoter in response to hypoxia	BP	1814	1259	307	11	172
71456	GO:0071455	cellular response to hyperoxia	BP	1814	1259	307	11	172
71456	GO:0097201	negative regulation of transcription from RNA polymerase II promoter in response to stress	BP	1814	1259	307	11	172
71456	GO:1990144	intrinsic apoptotic signaling pathway in response to hypoxia	BP	1814	1259	307	11	172
71456	GO:1990440	positive regulation of transcription from RNA polymerase II promoter in response to endoplasmic reticulum stress	BP	1814	1259	307	11	172
71499	GO:0071499	cellular response to laminar fluid shear stress	BP	1814	1259	307	3	172
71499	GO:0034616	response to laminar fluid shear stress	BP	1814	1259	307	3	172
71499	GO:0071498	cellular response to fluid shear stress	BP	1814	1259	307	3	172
7179	GO:0007179	transforming growth factor beta receptor signaling pathway	BP	1814	1259	307	6	172
7179	GO:0030509	BMP signaling pathway	BP	1814	1259	307	6	172
7179	GO:0032924	activin receptor signaling pathway	BP	1814	1259	307	6	172
7179	GO:0060395	SMAD protein signal transduction	BP	1814	1259	307	6	172
7179	GO:0071363	cellular response to growth factor stimulus	BP	1814	1259	307	6	172
7179	GO:0071559	response to transforming growth factor beta	BP	1814	1259	307	6	172
72203	GO:0072203	cell proliferation involved in metanephros development	BP	1814	1259	307	3	172
72203	GO:0072075	metanephric mesenchyme development	BP	1814	1259	307	3	172
72203	GO:0072207	metanephric epithelium development	BP	1814	1259	307	3	172
7611	GO:0007611	learning or memory	BP	1814	1259	307	3	172
7611	GO:0008306	associative learning	BP	1814	1259	307	3	172
7611	GO:0030534	adult behavior	BP	1814	1259	307	3	172
90090	GO:0090090	negative regulation of canonical Wnt signaling pathway	BP	1814	1259	307	4	172
90090	GO:0003308	negative regulation of Wnt signaling pathway involved in heart development	BP	1814	1259	307	4	172
90090	GO:0030177	positive regulation of Wnt signaling pathway	BP	1814	1259	307	4	172
90090	GO:0090263	positive regulation of canonical Wnt signaling pathway	BP	1814	1259	307	4	172
90303	GO:0090303	positive regulation of wound healing	BP	1814	1259	307	5	172
90303	GO:0010544	negative regulation of platelet activation	BP	1814	1259	307	5	172
90303	GO:0030193	regulation of blood coagulation	BP	1814	1259	307	5	172
90303	GO:0051918	negative regulation of fibrinolysis	BP	1814	1259	307	5	172
90303	GO:0061043	regulation of vascular wound healing	BP	1814	1259	307	5	172
9205	GO:0009205	purine ribonucleoside triphosphate metabolic process	BP	1814	1259	307	6	172
9205	GO:0006096	glycolytic process	BP	1814	1259	307	6	172
9205	GO:0006754	ATP biosynthetic process	BP	1814	1259	307	6	172
9205	GO:0009259	ribonucleotide metabolic process	BP	1814	1259	307	6	172
9205	GO:0046034	ATP metabolic process	BP	1814	1259	307	6	172
9205	GO:0061621	canonical glycolysis	BP	1814	1259	307	6	172
9267	GO:0009267	cellular response to starvation	BP	1814	1259	307	8	172
9267	GO:0007584	response to nutrient	BP	1814	1259	307	8	172
9267	GO:0031667	response to nutrient levels	BP	1814	1259	307	8	172
9267	GO:0031670	cellular response to nutrient	BP	1814	1259	307	8	172
9267	GO:0034198	cellular response to amino acid starvation	BP	1814	1259	307	8	172
9267	GO:0042149	cellular response to glucose starvation	BP	1814	1259	307	8	172
9267	GO:0042594	response to starvation	BP	1814	1259	307	8	172
9267	GO:0071260	cellular response to mechanical stimulus	BP	1814	1259	307	8	172
97192	GO:0097192	extrinsic apoptotic signaling pathway in absence of ligand	BP	1814	1259	307	3	172
97192	GO:0008625	extrinsic apoptotic signaling pathway via death domain receptors	BP	1814	1259	307	3	172
97192	GO:0036462	TRAIL-activated apoptotic signaling pathway	BP	1814	1259	307	3	172
9749	GO:0009749	response to glucose	BP	1814	1259	307	5	172
9749	GO:0009744	response to sucrose	BP	1814	1259	307	5	172
9749	GO:0010255	glucose mediated signaling pathway	BP	1814	1259	307	5	172
9749	GO:0033591	response to L-ascorbic acid	BP	1814	1259	307	5	172
9749	GO:0071333	cellular response to glucose stimulus	BP	1814	1259	307	5	172
98	GO:0000098	sulfur amino acid catabolic process	BP	1814	1259	307	4	172
98	GO:0006534	cysteine metabolic process	BP	1814	1259	307	4	172
98	GO:0019346	transsulfuration	BP	1814	1259	307	4	172
98	GO:0071267	L-methionine salvage	BP	1814	1259	307	4	172

## Sheet: 33_Steatosis_AOP_genes TopGO-Re
Representative	TermID	Name	GO_group	size_go_terms	go_terms_in_cluster	num_clusters	Num_Go_terms_per_cluster	clusters_big_eq_3_GO_terms
10887	GO:0010887	negative regulation of cholesterol storage	BP	178	79	26	4	15
10887	GO:0010886	positive regulation of cholesterol storage	BP	178	79	26	4	15
10887	GO:0010891	negative regulation of sequestering of triglyceride	BP	178	79	26	4	15
10887	GO:0032369	negative regulation of lipid transport	BP	178	79	26	4	15
1901653	GO:1901653	cellular response to peptide	BP	178	79	26	3	15
1901653	GO:0008286	insulin receptor signaling pathway	BP	178	79	26	3	15
1901653	GO:0032869	cellular response to insulin stimulus	BP	178	79	26	3	15
1903580	GO:1903580	positive regulation of ATP metabolic process	BP	178	79	26	5	15
1903580	GO:0006110	regulation of glycolytic process	BP	178	79	26	5	15
1903580	GO:0006111	regulation of gluconeogenesis	BP	178	79	26	5	15
1903580	GO:0010677	negative regulation of cellular carbohydrate metabolic process	BP	178	79	26	5	15
1903580	GO:0010907	positive regulation of glucose metabolic process	BP	178	79	26	5	15
32000	GO:0032000	positive regulation of fatty acid beta-oxidation	BP	178	79	26	3	15
32000	GO:0045723	positive regulation of fatty acid biosynthetic process	BP	178	79	26	3	15
32000	GO:0046321	positive regulation of fatty acid oxidation	BP	178	79	26	3	15
33189	GO:0033189	response to vitamin A	BP	178	79	26	5	15
33189	GO:0009267	cellular response to starvation	BP	178	79	26	5	15
33189	GO:0031667	response to nutrient levels	BP	178	79	26	5	15
33189	GO:0031670	cellular response to nutrient	BP	178	79	26	5	15
33189	GO:0042594	response to starvation	BP	178	79	26	5	15
34379	GO:0034379	very-low-density lipoprotein particle assembly	BP	178	79	26	4	15
34379	GO:0034374	low-density lipoprotein particle remodeling	BP	178	79	26	4	15
34379	GO:0034383	low-density lipoprotein particle clearance	BP	178	79	26	4	15
34379	GO:0071827	plasma lipoprotein particle organization	BP	178	79	26	4	15
42632	GO:0042632	cholesterol homeostasis	BP	178	79	26	3	15
42632	GO:0055089	fatty acid homeostasis	BP	178	79	26	3	15
42632	GO:0070328	triglyceride homeostasis	BP	178	79	26	3	15
43401	GO:0043401	steroid hormone mediated signaling pathway	BP	178	79	26	3	15
43401	GO:0032570	response to progesterone	BP	178	79	26	3	15
43401	GO:0071549	cellular response to dexamethasone stimulus	BP	178	79	26	3	15
45471	GO:0045471	response to ethanol	BP	178	79	26	3	15
45471	GO:0071379	cellular response to prostaglandin stimulus	BP	178	79	26	3	15
45471	GO:0071380	cellular response to prostaglandin E stimulus	BP	178	79	26	3	15
50796	GO:0050796	regulation of insulin secretion	BP	178	79	26	4	15
50796	GO:0035774	positive regulation of insulin secretion involved in cellular response to glucose stimulus	BP	178	79	26	4	15
50796	GO:0050709	negative regulation of protein secretion	BP	178	79	26	4	15
50796	GO:0050714	positive regulation of protein secretion	BP	178	79	26	4	15
6084	GO:0006084	acetyl-CoA metabolic process	BP	178	79	26	3	15
6084	GO:0035337	fatty-acyl-CoA metabolic process	BP	178	79	26	3	15
6084	GO:1901570	fatty acid derivative biosynthetic process	BP	178	79	26	3	15
6633	GO:0006633	fatty acid biosynthetic process	BP	178	79	26	5	15
6633	GO:0006631	fatty acid metabolic process	BP	178	79	26	5	15
6633	GO:0006635	fatty acid beta-oxidation	BP	178	79	26	5	15
6633	GO:0006699	bile acid biosynthetic process	BP	178	79	26	5	15
6633	GO:0046503	glycerolipid catabolic process	BP	178	79	26	5	15
70508	GO:0070508	cholesterol import	BP	178	79	26	3	15
70508	GO:0015918	sterol transport	BP	178	79	26	3	15
70508	GO:0030299	intestinal cholesterol absorption	BP	178	79	26	3	15
8210	GO:0008210	estrogen metabolic process	BP	178	79	26	4	15
8210	GO:0006694	steroid biosynthetic process	BP	178	79	26	4	15
8210	GO:0008203	cholesterol metabolic process	BP	178	79	26	4	15
8210	GO:0008209	androgen metabolic process	BP	178	79	26	4	15
90181	GO:0090181	regulation of cholesterol metabolic process	BP	178	79	26	5	15
90181	GO:0010565	regulation of cellular ketone metabolic process	BP	178	79	26	5	15
90181	GO:0045540	regulation of cholesterol biosynthetic process	BP	178	79	26	5	15
90181	GO:0050810	regulation of steroid biosynthetic process	BP	178	79	26	5	15
90181	GO:0062013	positive regulation of small molecule metabolic process	BP	178	79	26	5	15
