# Supplementary material for: Assessing network-based methods in the context of system toxicology
Source: Front Pharmacol. 2023 Jul 12;14:1225697. doi: 10.3389/fphar.2023.1225697 (PMC10369070; doi:10.3389/fphar.2023.1225697)
Supplement: Supplementary file 3 [file Table1.XLSX]

## Sheet: README
This file contains VPA targets, liver steatosis genes, and genes obtained from AOPwiki for the case study.
We used 7 Steatosis IDs to collect all genes associated with this endpoint.
Nonalcoholic Steatohepatitis (C3241937), Steatohepatitis (C2711227), Microvesicular hepatic steatosis (C1850415), Macrovesicular hepatic steatosis (C1837256), Diffuse hepatic steatosis (C1849686), Non-alcoholic Fatty Liver Disease (C0400966), Fatty Liver (C0015695)
Columns from Liver Steatosis genes
CUI Diseases steatosis: CUIs that include the same target
GeneID(NCBI): GeneID from NCBI
Gene Symbol: Gene Name
Network method detect the target: Name of network methods that detect the Steatosis target
Number approaches detect gene: Numeric number of network approaches that detect the same Steatosis target
Columns for VPA targets
Compound Name: Valproic acid name
Inchikey: VPA Inchikey
GeneID(NCBI): GeneID from NCBI
Gene Symbol: Gene Name
Source VPA target: Chemical sources that includes the VPA target
Network method detect the target: Name of network methods that detect the Steatosis target
Columns for AOP wiki Genes
GeneID(NCBI): GeneID from NCBI
Gene Symbol: Gene Name
AOPWiki_ID: AOPwiki IDs associated with Steatosis
Network method detect the target: Name of network methods that detect the Steatosis target

## Sheet: Liver Steatosis genes
CUI Diseases steatosis	GeneID(NCBI)	Gene Symbol	Network method detect the target	Number approaches detect gene
C3241937, C0400966	2	A2M	MSI, GUILD	2
C2711227, C0015695	16	AARS1	0	0
C3241937, C2711227, C0400966, C4529962, C0015695	19	ABCA1	MSI, GUILD	2
C0400966	24	ABCA4	0	0
C2711227, C0400966	25	ABL1	MSI, GUILD	2
C0400966	28	ABO	0	0
C3241937, C2711227, C0400966, C4529962, C0015695	31	ACACA	GUILD	1
C3241937, C2711227, C0400966, C4529962, C0015695	32	ACACB	MSI, GUILD	2
C2711227, C0015695	34	ACADM	MSI	1
C2711227	35	ACADS	MSI	1
C2711227	37	ACADVL	MSI	1
C3241937, C0400966	38	ACAT1	MSI, GUILD	2
C2711227, C0015695	39	ACAT2	MSI, GUILD	2
C3241937, C2711227, C0400966, C0015695	47	ACLY	MSI, GUILD	2
C3241937	48	ACO1	MSI	1
C3241937, C2711227, C0400966, C0015695, C1849686	51	ACOX1	MSI	1
C3241937, C0400966	59	ACTA2	GUILD	1
C3241937, C0400966	60	ACTB	MSI, GUILD	2
C0400966	109	ADCY3	0	0
C2711227	116	ADCYAP1	0	0
C2711227, C0400966, C0015695	123	PLIN2	0	0
C3241937, C2711227, C0015695	124	ADH1A	MSI	1
C3241937, C2711227, C0400966, C0015695	125	ADH1B	MSI	1
C3241937	126	ADH1C	MSI	1
C3241937	127	ADH4	MSI	1
C0400966	131	ADH7	MSI	1
C2711227	132	ADK	0	0
C3241937	134	ADORA1	0	0
C2711227, C0015695	136	ADORA2B	0	0
C0400966	140	ADORA3	0	0
C3241937, C0400966	142	PARP1	MONET, MSI, GUILD	3
C0400966	148	ADRA1A	0	0
C0400966	151	ADRA2B	0	0
C2711227, C0400966, C4529962, C0015695	154	ADRB2	MSI, GUILD, iPath	3
C3241937, C2711227, C0400966, C0015695	155	ADRB3	0	0
C3241937, C2711227, C0400966	156	GRK2	MSI, GUILD	2
C3241937, C2711227, C0400966	165	AEBP1	0	0
C3241937, C2711227, C0015695	174	AFP	MSI	1
C3241937, C2711227, C0400966, C0015695	177	AGER	MSI, GUILD	2
C2711227, C0015695	181	AGRP	0	0
C4529962	182	JAG1	GUILD	1
C3241937, C2711227, C0400966, C0015695	183	AGT	MSI, GUILD	2
C3241937, C2711227, C0400966	185	AGTR1	MSI, GUILD	2
C2711227, C0400966	189	AGXT	MSI, GUILD	2
C3241937, C2711227, C4529962, C0015695	191	AHCY	GUILD	1
C3241937, C2711227, C0400966, C4529962, C0015695	196	AHR	MSI, GUILD	2
C2711227, C0400966, C4529962, C0015695	197	AHSG	GUILD, iPath	2
C3241937, C2711227, C0400966, C0015695	207	AKT1	MONET, MSI, GUILD, iPath	4
C2711227, C4529962, C0015695	208	AKT2	MSI, GUILD	2
C3241937, C2711227, C0400966, C4529962, C0015695	213	ALB	MSI, GUILD, iPath	3
C3241937, C2711227	216	ALDH1A1	MSI	1
C3241937, C2711227, C0015695	217	ALDH2	MSI, GUILD	2
C3241937	219	ALDH1B1	MSI, GUILD	2
C2711227, C0400966, C4529962	229	ALDOB	MSI, iPath	2
C2711227, C0400966, C0015695	231	AKR1B1	MSI	1
C0400966, C4529962	240	ALOX5	GUILD	1
C0400966	246	ALOX15	0	0
C3241937, C2711227, C0400966	285	ANGPT2	0	0
C2711227	291	SLC25A4	GUILD	1
C3241937, C2711227, C0015695	301	ANXA1	MSI, GUILD	2
C3241937, C2711227, C0400966, C4529962	302	ANXA2	MSI, GUILD	2
C3241937	308	ANXA5	GUILD	1
C3241937, C0400966	309	ANXA6	GUILD	1
C2711227, C0015695	316	AOX1	MSI	1
C2711227	325	APCS	0	0
C2711227, C0015695	327	APEH	0	0
C3241937	329	BIRC2	MSI, GUILD	2
C2711227	330	BIRC3	GUILD	1
C2711227, C0015695	331	XIAP	GUILD	1
C3241937, C2711227, C0400966, C4529962, C0015695	335	APOA1	MSI, GUILD	2
C2711227, C4529962, C0015695	337	APOA4	MSI	1
C3241937, C2711227, C0400966, C4529962, C0015695	338	APOB	MSI, GUILD	2
C2711227, C0015695	341	APOC1	0	0
C3241937, C2711227, C0400966, C4529962, C0015695	345	APOC3	0	0
C2711227, C0015695	346	APOC4	0	0
C2711227, C0015695	347	APOD	GUILD	1
C3241937, C2711227, C0400966, C4529962, C0015695	348	APOE	MSI, GUILD, iPath	3
C0400966	351	APP	MSI, GUILD, iPath	3
C3241937, C2711227, C0400966, C4529962, C0015695	355	FAS	MSI, GUILD	2
C2711227, C0400966	356	FASLG	GUILD	1
C2711227, C0015695	360	AQP3	0	0
C2711227, C0400966, C0015695	366	AQP9	0	0
C2711227, C0400966, C0015695	367	AR	MONET, MSI, GUILD	3
C3241937	374	AREG	GUILD	1
C2711227, C0015695	393	ARHGAP4	0	0
C3241937, C2711227, C0400966	405	ARNT	MSI, GUILD	2
C0400966	406	ARNTL	MSI, GUILD	2
C3241937, C2711227, C0400966	408	ARRB1	MSI, GUILD	2
C2711227	427	ASAH1	0	0
C2711227, C0400966, C4529962, C0015695	467	ATF3	MSI, GUILD	2
C3241937, C2711227, C0400966	468	ATF4	MSI, GUILD	2
C2711227	471	ATIC	GUILD	1
C2711227, C0400966, C0015695	472	ATM	MSI, GUILD, iPath	3
C2711227	473	RERE	MSI, GUILD	2
C2711227, C0015695	479	ATP12A	0	0
C2711227, C0015695	495	ATP4A	iPath	1
C2711227	537	ATP6AP1	0	0
C0400966	538	ATP7A	0	0
C2711227, C0015695	540	ATP7B	0	0
C2711227, C0400966, C4529962, C0015695	551	AVP	0	0
C3241937, C2711227, C0400966, C0015695	563	AZGP1	0	0
C2711227, C0015695	566	AZU1	0	0
C0400966	567	B2M	GUILD	1
C3241937, C2711227, C0400966, C0015695	570	BAAT	0	0
C3241937	571	BACH1	0	0
C3241937	578	BAK1	MSI, GUILD	2
C0400966	581	BAX	MSI, GUILD	2
C0400966	586	BCAT1	0	0
C3241937, C2711227, C0400966, C0015695	590	BCHE	0	0
C2711227, C0015695	595	CCND1	MONET, MSI, GUILD	3
C3241937, C2711227, C0400966, C4529962	596	BCL2	MSI, GUILD	2
C3241937, C2711227, C0400966, C4529962, C0015695	597	BCL2A1	GUILD	1
C2711227, C4529962, C0015695	604	BCL6	MSI, GUILD	2
C0400966	613	BCR	GUILD	1
C1850415, C2711227	617	BCS1L	MSI	1
C2711227, C0015695	622	BDH1	GUILD	1
C3241937, C2711227, C0400966, C0015695	627	BDNF	MSI, GUILD	2
C0400966	632	BGLAP	MONET	1
C3241937	633	BGN	GUILD	1
C3241937, C2711227, C0400966, C0015695	634	CEACAM1	GUILD	1
C2711227, C0015695	635	BHMT	MSI	1
C3241937	643	CXCR5	GUILD	1
C3241937, C2711227, C0400966, C0015695	644	BLVRA	GUILD	1
C2711227, C0400966, C0015695	652	BMP4	MSI	1
C3241937, C2711227, C0400966, C0015695	656	BMP8B	0	0
C2711227, C0400966	664	BNIP3	MSI, GUILD	2
C2711227	667	DST	GUILD	1
C3241937, C2711227, C0400966, C0015695	682	BSG	MSI, GUILD	2
C3241937, C2711227, C0400966	706	TSPO	0	0
C2711227, C0400966, C0015695	717	C2	0	0
C2711227, C0400966, C0015695	718	C3	GUILD	1
C2711227	719	C3AR1	0	0
C3241937	730	C7	0	0
C3241937	761	CA3	0	0
C2711227	788	SLC25A20	0	0
C0400966	796	CALCA	0	0
C0400966	822	CAPG	0	0
C2711227, C0015695	824	CAPN2	GUILD	1
C3241937, C0400966	834	CASP1	MONET, MSI, GUILD	3
C3241937, C2711227	835	CASP2	GUILD	1
C3241937, C2711227, C0400966	836	CASP3	MSI, GUILD, iPath	3
C3241937	839	CASP6	MONET, GUILD	2
C2711227, C0400966, C0015695	841	CASP8	MSI, GUILD, iPath	3
C3241937	842	CASP9	GUILD	1
C2711227, C0015695	846	CASR	0	0
C3241937, C2711227, C0400966, C0015695	847	CAT	MSI, GUILD	2
C3241937, C2711227, C0400966, C0015695	857	CAV1	MSI, GUILD, iPath	3
C0400966	860	RUNX2	MSI, GUILD	2
C3241937, C2711227, C0400966	861	RUNX1	MSI, GUILD	2
C3241937	864	RUNX3	MSI, GUILD	2
C2711227, C0015695	868	CBLB	GUILD	1
C2711227, C0400966, C0015695	873	CBR1	MSI, GUILD	2
C2711227, C0015695	875	CBS	MSI, GUILD	2
C3241937	885	CCK	0	0
C3241937	887	CCKBR	GUILD	1
C2711227, C0015695	909	CD1A	0	0
C2711227, C0015695	910	CD1B	0	0
C3241937, C2711227, C0015695	920	CD4	MSI, GUILD	2
C0400966	922	CD5L	0	0
C3241937	925	CD8A	MSI	1
C3241937	928	CD9	GUILD	1
C3241937, C2711227, C0400966	929	CD14	0	0
C3241937, C2711227	947	CD34	MSI	1
C3241937, C2711227, C0400966, C4529962, C0015695	948	CD36	MSI, GUILD	2
C3241937, C0400966	952	CD38	0	0
C2711227, C0015695	953	ENTPD1	0	0
C0400966	958	CD40	GUILD	1
C3241937, C2711227, C0015695	959	CD40LG	GUILD	1
C3241937, C2711227, C0400966	960	CD44	MSI, GUILD	2
C2711227	961	CD47	0	0
C3241937, C0400966	972	CD74	MSI, GUILD	2
C2711227, C0400966, C0015695	974	CD79B	0	0
C2711227, C0015695	1012	CDH13	MSI	1
C2711227, C0400966	1017	CDK2	MSI, GUILD	2
C2711227, C0400966	1026	CDKN1A	MSI, GUILD	2
C2711227, C4529962, C0015695	1029	CDKN2A	MSI, GUILD	2
C0400966	1048	CEACAM5	0	0
C3241937, C2711227, C0400966, C0015695	1050	CEBPA	MSI, GUILD	2
C2711227	1051	CEBPB	MSI, GUILD	2
C0400966	1056	CEL	0	0
C3241937, C2711227, C0400966, C0015695	1066	CES1	0	0
C3241937, C2711227, C0400966, C4529962, C0015695	1071	CETP	0	0
C2711227, C0015695	1080	CFTR	MSI, GUILD	2
C0400966	1084	CEACAM3	0	0
C0400966	1087	CEACAM7	GUILD	1
C2711227, C4529962, C0015695	1113	CHGA	0	0
C2711227, C0400966, C4529962, C0015695	1116	CHI3L1	0	0
C3241937, C2711227, C0400966	1118	CHIT1	0	0
C0400966	1147	CHUK	MSI, GUILD	2
C2711227, C0400966, C0015695	1149	CIDEA	MONET	1
C3241937	1154	CISH	GUILD	1
C2711227, C0015695	1178	CLC	0	0
C3241937, C0400966	1181	CLCN2	0	0
C3241937, C2711227, C0400966	1191	CLU	MSI, GUILD	2
C0400966	1211	CLTA	GUILD	1
C3241937, C2711227, C0015695	1215	CMA1	0	0
C0400966	1233	CCR4	0	0
C3241937, C0400966	1234	CCR5	GUILD	1
C3241937, C2711227, C0015695	1244	ABCC2	0	0
C3241937, C2711227, C0400966, C4529962, C0015695	1268	CNR1	0	0
C2711227, C0400966, C0015695	1269	CNR2	0	0
C2711227, C0015695	1270	CNTF	GUILD	1
C3241937, C2711227, C0400966	1277	COL1A1	MSI, GUILD	2
C0400966	1278	COL1A2	GUILD	1
C0400966	1281	COL3A1	0	0
C0400966	1302	COL11A2	MONET	1
C3241937, C0400966	1305	COL13A1	0	0
C2711227, C0400966, C0015695	1316	KLF6	GUILD	1
C2711227, C0015695	1326	MAP3K8	GUILD	1
C2711227	1355	COX15	0	0
C2711227, C0400966, C0015695	1356	CP	MONET	1
C0400966	1369	CPN1	0	0
C3241937, C0400966	1371	CPOX	iPath	1
C2711227, C0400966	1373	CPS1	0	0
C3241937, C2711227, C0400966, C4529962, C0015695	1374	CPT1A	0	0
C3241937, C2711227, C0015695	1375	CPT1B	0	0
C3241937, C1837256, C2711227, C0400966, C4529962, C0015695	1376	CPT2	MSI	1
C2711227, C0015695	1384	CRAT	0	0
C0400966	1385	CREB1	MSI, GUILD	2
C3241937, C2711227, C0400966, C4529962, C0015695	1401	CRP	GUILD	1
C2711227, C0015695	1428	CRYM	0	0
C2711227, C0015695	1431	CS	0	0
C3241937, C2711227, C0400966, C4529962, C0015695	1432	MAPK14	MSI, GUILD, iPath	3
C0400966	1435	CSF1	GUILD	1
C0400966	1436	CSF1R	GUILD	1
C3241937, C2711227	1437	CSF2	MSI	1
C2711227, C0400966, C0015695	1440	CSF3	0	0
C2711227, C0400966, C0015695	1463	NCAN	0	0
C0400966	1471	CST3	MONET	1
C2711227, C0400966	1490	CCN2	0	0
C2711227, C0015695	1491	CTH	MSI	1
C0400966	1495	CTNNA1	GUILD	1
C3241937, C2711227, C0400966, C4529962, C0015695	1499	CTNNB1	MSI, GUILD, iPath	3
C3241937	1508	CTSB	GUILD	1
C3241937, C2711227, C0400966, C0015695	1509	CTSD	MSI, GUILD, iPath	3
C0400966	1520	CTSS	MONET	1
C0400966	1524	CX3CR1	0	0
C2711227, C0015695	1525	CXADR	0	0
C3241937, C0400966	1535	CYBA	0	0
C3241937, C0400966, C4529962	1536	CYBB	MSI	1
C2711227, C0400966, C0015695	1543	CYP1A1	MSI	1
C3241937, C0400966	1544	CYP1A2	MSI, iPath	2
C2711227, C0015695	1545	CYP1B1	MSI, GUILD	2
C0400966	1548	CYP2A6	iPath	1
C2711227, C0400966	1555	CYP2B6	iPath	1
C0400966	1557	CYP2C19	iPath	1
C0400966	1559	CYP2C9	MONET, MSI, iPath	3
C0400966	1565	CYP2D6	MSI, iPath	2
C3241937, C2711227, C0400966, C4529962, C0015695	1571	CYP2E1	MSI	1
C0400966	1573	CYP2J2	0	0
C2711227, C0400966, C4529962, C0015695	1576	CYP3A4	MSI, iPath	2
C2711227, C0400966, C0015695	1577	CYP3A5	MONET, iPath	2
C0400966	1579	CYP4A11	0	0
C3241937, C2711227, C0400966, C4529962, C0015695	1582	CYP8B1	MONET	1
C2711227, C0015695	1586	CYP17A1	0	0
C2711227, C0400966, C0015695	1588	CYP19A1	iPath	1
C0400966	1591	CYP24A1	0	0
C3241937, C2711227, C0400966, C4529962	1593	CYP27A1	0	0
C0400966	1605	DAG1	GUILD	1
C2711227, C0015695	1620	BRINP1	MSI, GUILD	2
C3241937	1634	DCN	GUILD	1
C3241937, C2711227, C0400966, C0015695	1636	ACE	0	0
C2711227, C0015695	1644	DDC	GUILD	1
C3241937, C2711227, C0400966, C4529962, C0015695	1649	DDIT3	MSI, GUILD	2
C3241937, C2711227	1650	DDOST	GUILD	1
C2711227, C0015695	1654	DDX3X	MSI, GUILD	2
C0400966, C0015695	1675	CFD	0	0
C2711227	1716	DGUOK	iPath	1
C2711227, C0400966, C0015695	1717	DHCR7	0	0
C3241937, C0400966	1728	NQO1	GUILD	1
C2711227, C0015695	1760	DMPK	GUILD	1
C2711227, C0015695	1777	DNASE2	0	0
C3241937, C2711227, C0015695	1786	DNMT1	MSI, GUILD	2
C0400966	1788	DNMT3A	MSI, GUILD	2
C3241937	1789	DNMT3B	MSI, GUILD	2
C3241937, C2711227, C0400966, C4529962, C0015695	1803	DPP4	MSI, GUILD	2
C2711227	1806	DPYD	MSI	1
C2711227, C0015695	1813	DRD2	0	0
C2711227, C0015695	1822	ATN1	GUILD	1
C3241937	1845	DUSP3	GUILD	1
C3241937, C2711227, C0400966, C0015695	1849	DUSP7	GUILD	1
C2711227, C0400966, C0015695	1852	DUSP9	GUILD	1
C3241937, C2711227, C0400966, C0015695	1869	E2F1	MONET, MSI, GUILD	3
C3241937, C1837256, C2711227, C0015695	1890	TYMP	MSI	1
C3241937, C2711227, C0400966	1896	EDA	0	0
C2711227	1902	LPAR1	0	0
C3241937, C2711227	1906	EDN1	MONET, MSI	2
C0400966	1909	EDNRA	0	0
C0400966	1915	EEF1A1	MSI, GUILD	2
C3241937, C2711227, C0400966, C4529962, C0015695	1917	EEF1A2	MSI, GUILD	2
C2711227, C0400966, C0015695	1950	EGF	MSI, GUILD	2
C0400966	1952	CELSR2	0	0
C3241937, C2711227, C0400966, C4529962, C0015695	1956	EGFR	MSI, GUILD, iPath	3
C2711227, C0015695	1958	EGR1	MSI, GUILD	2
C3241937, C0400966, C4529962	1962	EHHADH	MSI, GUILD	2
C3241937, C2711227, C0400966, C0015695	1965	EIF2S1	GUILD	1
C2711227, C0400966, C0015695	1978	EIF4EBP1	MONET, GUILD	2
C3241937, C2711227, C0400966, C0015695	1991	ELANE	0	0
C2711227, C0400966, C0015695	1994	ELAVL1	MSI, GUILD, iPath	3
C3241937, C0400966	2000	ELF4	0	0
C0400966	2002	ELK1	MSI, GUILD, iPath	3
C3241937	2006	ELN	0	0
C3241937, C4529962	2011	MARK2	GUILD, iPath	2
C2711227	2012	EMP1	GUILD	1
C3241937	2022	ENG	0	0
C2711227, C0015695	2026	ENO2	GUILD	1
C3241937	2027	ENO3	MSI	1
C2711227, C0400966, C0015695	2034	EPAS1	MSI, GUILD	2
C0400966	2036	EPB41L1	GUILD, iPath	2
C2711227, C0015695	2048	EPHB2	GUILD	1
C2711227, C0400966, C0015695	2056	EPO	MSI	1
C0400966	2057	EPOR	GUILD	1
C2711227	2064	ERBB2	MSI, GUILD	2
C0400966	2065	ERBB3	GUILD	1
C3241937, C2711227, C0400966, C0015695	2081	ERN1	MSI, GUILD	2
C0400966	2091	FBL	MSI, GUILD	2
C2711227, C0400966, C4529962, C0015695	2099	ESR1	MSI, GUILD, iPath	3
C3241937, C2711227, C0400966, C4529962, C0015695	2101	ESRRA	MONET, GUILD	2
C2711227, C4529962, C0015695	2104	ESRRG	MONET, GUILD	2
C2711227, C0400966	2108	ETFA	MSI, GUILD	2
C2711227	2109	ETFB	MSI	1
C2711227	2110	ETFDH	MSI	1
C2711227, C0015695	2119	ETV5	MONET, GUILD, iPath	3
C3241937, C2711227, C0400966	2146	EZH2	MSI, GUILD	2
C3241937, C2711227	2147	F2	MSI	1
C2711227, C0400966, C0015695	2149	F2R	0	0
C2711227, C0400966, C0015695	2150	F2RL1	MONET, MSI	2
C2711227, C0400966, C0015695	2152	F3	GUILD	1
C3241937	2153	F5	MONET	1
C2711227, C0400966, C0015695	2157	F8	MONET	1
C3241937, C2711227, C0400966, C0015695	2167	FABP4	0	0
C2711227, C0400966, C0015695	2168	FABP1	GUILD	1
C0400966	2169	FABP2	0	0
C0400966	2171	FABP5	GUILD	1
C2711227, C0015695	2176	FANCC	GUILD	1
C3241937, C0400966, C0015695	2180	ACSL1	0	0
C3241937, C2711227, C0400966, C0015695	2182	ACSL4	GUILD	1
C3241937, C2711227, C0400966, C0015695	2185	PTK2B	MSI, GUILD	2
C3241937, C2711227	2191	FAP	0	0
C2711227	2193	FARSA	GUILD	1
C3241937, C2711227, C0400966, C4529962, C0015695	2194	FASN	MSI, GUILD	2
C3241937, C2711227	2195	FAT1	0	0
C0400966	2200	FBN1	0	0
C2711227	2203	FBP1	MSI, GUILD	2
C0400966	2207	FCER1G	GUILD	1
C2711227	2209	FCGR1A	0	0
C0400966	2213	FCGR2B	GUILD	1
C0400966	2214	FCGR3A	GUILD	1
C0400966	2215	FCGR3B	0	0
C3241937, C0400966	2222	FDFT1	GUILD	1
C0400966	2239	GPC4	0	0
C2711227, C0400966, C0015695	2246	FGF1	MSI	1
C3241937	2250	FGF5	0	0
C0400966	2255	FGF10	MSI	1
C3241937, C2711227, C0400966, C0015695	2264	FGFR4	MSI, GUILD	2
C2711227, C0400966, C0015695	2267	FGL1	MSI	1
C3241937	2268	FGR	GUILD	1
C2711227, C0015695	2289	FKBP5	MONET, GUILD	2
C3241937, C2711227, C0400966, C4529962, C0015695	2308	FOXO1	MSI, GUILD	2
C2711227, C0400966, C0015695	2309	FOXO3	MSI, GUILD	2
C0400966	2313	FLI1	GUILD	1
C2711227, C0400966, C0015695	2314	FLII	GUILD	1
C3241937, C2711227	2321	FLT1	GUILD	1
C3241937, C2711227	2350	FOLR2	0	0
C3241937, C2711227, C0400966	2353	FOS	MSI, GUILD	2
C3241937, C0400966	2354	FOSB	GUILD	1
C2711227	2355	FOSL2	GUILD	1
C2711227, C0400966, C0015695	2357	FPR1	0	0
C2711227, C0015695	2358	FPR2	0	0
C3241937, C2711227, C0400966, C4529962, C0015695	2475	MTOR	MONET, MSI, GUILD, iPath	4
C0400966	2487	FRZB	0	0
C0400966	2494	NR5A2	MONET, GUILD	2
C0400966	2516	NR5A1	MSI, GUILD	2
C3241937	2520	GAST	MONET	1
C3241937, C2711227, C0400966	2523	FUT1	0	0
C2711227	2526	FUT4	0	0
C2711227	2531	KDSR	0	0
C3241937, C2711227, C4529962, C0015695	2538	G6PC1	0	0
C2711227, C0400966, C0015695	2539	G6PD	MSI, GUILD	2
C2711227	2542	SLC37A4	0	0
C2711227, C0015695	2548	GAA	0	0
C2711227, C0015695	2551	GABPA	MSI, GUILD	2
C2711227, C0015695	2553	GABPB1	GUILD	1
C2711227	2563	GABRD	0	0
C2711227, C0400966	2597	GAPDH	MSI, GUILD	2
C3241937	2621	GAS6	MSI	1
C2711227, C0400966, C0015695	2638	GC	0	0
C3241937, C2711227, C0400966, C4529962, C0015695	2641	GCG	0	0
C2711227, C0400966, C0015695	2642	GCGR	0	0
C3241937, C2711227, C0400966, C0015695	2645	GCK	MSI	1
C3241937, C2711227, C0400966, C4529962, C0015695	2646	GCKR	GUILD	1
C3241937, C0400966	2651	GCNT2	0	0
C3241937, C2711227, C0400966, C0015695	2658	GDF2	0	0
C2711227, C0015695	2662	GDF10	0	0
C2711227, C0400966, C0015695	2668	GDNF	MSI, GUILD	2
C3241937, C2711227, C0400966, C0015695	2671	GFER	0	0
C3241937, C2711227, C0400966, C0015695	2678	GGT1	MSI	1
C3241937, C2711227, C0400966, C4529962, C0015695	2688	GH1	MSI, GUILD, iPath	3
C0400966	2691	GHRH	0	0
C0400966	2693	GHSR	0	0
C3241937	2694	CBLIF	0	0
C3241937, C2711227, C0400966, C0015695	2695	GIP	GUILD	1
C2711227, C0015695	2696	GIPR	GUILD	1
C2711227	2697	GJA1	GUILD	1
C0400966	2703	GJA8	0	0
C3241937, C2711227, C0400966, C0015695	2710	GK	0	0
C3241937, C0400966	2717	GLA	0	0
C0400966	2720	GLB1	0	0
C3241937, C2711227, C0400966, C4529962	2729	GCLC	MSI	1
C2711227	2730	GCLM	GUILD	1
C0400966	2736	GLI2	MSI, GUILD	2
C3241937, C2711227, C0400966, C4529962, C0015695	2740	GLP1R	MSI	1
C2711227, C0400966, C4529962, C0015695	2745	GLRX	0	0
C2711227, C4529962	2771	GNAI2	GUILD	1
C3241937, C0400966	2805	GOT1	MSI, GUILD	2
C0400966	2806	GOT2	MSI, GUILD	2
C3241937	2811	GP1BA	0	0
C2711227, C0015695	2819	GPD1	0	0
C0400966	2820	GPD2	0	0
C2711227, C0400966, C0015695	2821	GPI	MSI, iPath	2
C4529962	2822	GPLD1	MONET	1
C2711227, C0400966	2833	CXCR3	0	0
C2711227, C0015695	2859	GPR35	0	0
C3241937, C2711227, C0400966, C0015695	2864	FFAR1	0	0
C0400966	2867	FFAR2	0	0
C3241937, C2711227, C0400966, C4529962	2874	GPS2	MSI, GUILD	2
C3241937, C2711227, C0400966, C4529962, C0015695	2875	GPT	0	0
C3241937, C0400966	2876	GPX1	MSI	1
C3241937, C2711227, C0400966, C0015695	2879	GPX4	MSI	1
C2711227, C0015695	2885	GRB2	MSI, GUILD	2
C2711227, C0015695	2887	GRB10	GUILD	1
C2711227, C0015695	2889	RAPGEF1	GUILD	1
C3241937, C0400966	2896	GRN	GUILD	1
C3241937, C2711227, C0400966, C0015695	2908	NR3C1	MSI, GUILD, iPath	3
C2711227	2915	GRM5	0	0
C3241937, C2711227, C0015695	2919	CXCL1	MONET	1
C0400966	2920	CXCL2	0	0
C0400966	2923	PDIA3	GUILD	1
C3241937, C2711227, C4529962, C0015695	2932	GSK3B	MSI, GUILD	2
C2711227, C0015695	2934	GSN	GUILD	1
C3241937, C2711227, C0400966, C0015695	2936	GSR	MSI	1
C3241937, C0400966, C4529962	2938	GSTA1	0	0
C3241937, C0400966	2944	GSTM1	0	0
C0400966, C4529962	2946	GSTM2	0	0
C4529962	2948	GSTM4	GUILD	1
C4529962	2949	GSTM5	GUILD	1
C3241937, C0400966	2950	GSTP1	GUILD	1
C3241937, C0400966	2952	GSTT1	0	0
C4529962	2965	GTF2H1	GUILD	1
C2711227	2998	GYS2	0	0
C0400966	3002	GZMB	0	0
C0400966	3028	HSD17B10	MSI, GUILD	2
C2711227, C0400966, C0015695, C1849686	3030	HADHA	MSI, GUILD	2
C0400966, C1849686	3032	HADHB	MSI, GUILD	2
C3241937, C2711227, C0400966	3033	HADH	MSI	1
C3241937	3039	HBA1	GUILD	1
C0400966	3043	HBB	GUILD	1
C3241937	3054	HCFC1	MONET, MSI, GUILD	3
C2711227, C0015695	3065	HDAC1	MSI, GUILD, iPath	3
C3241937	3066	HDAC2	MSI, GUILD, iPath	3
C3241937, C0400966	3067	HDC	0	0
C2711227, C0015695	3069	HDLBP	GUILD	1
C3241937	3075	CFH	GUILD	1
C3241937, C2711227, C0400966, C4529962, C0015695	3077	HFE	MONET, MSI	2
C2711227	3081	HGD	0	0
C3241937, C2711227, C0400966, C0015695	3082	HGF	MONET, MSI, GUILD	3
C2711227, C0400966, C0015695	3084	NRG1	MSI, GUILD	2
C3241937, C2711227, C0400966, C0015695	3091	HIF1A	MSI, GUILD	2
C3241937, C2711227, C0400966, C0015695	3098	HK1	MSI	1
C3241937	3106	HLA-B	MSI, GUILD	2
C0400966	3108	HLA-DMA	0	0
C0400966	3117	HLA-DQA1	0	0
C0400966	3119	HLA-DQB1	0	0
C3241937, C2711227, C0400966, C0015695	3146	HMGB1	MSI, GUILD	2
C2711227, C0400966, C0015695	3156	HMGCR	MSI	1
C3241937, C0400966	3158	HMGCS2	MSI	1
C3241937, C4529962	3161	HMMR	0	0
C3241937, C2711227, C0400966, C4529962, C0015695	3162	HMOX1	MSI	1
C2711227, C0400966, C4529962, C0015695	3164	NR4A1	MSI, GUILD	2
C0400966	3169	FOXA1	MSI, GUILD	2
C0400966, C0015695	3170	FOXA2	MSI	1
C3241937, C0400966, C4529962	3171	FOXA3	MSI	1
C3241937, C2711227, C0400966, C4529962, C0015695	3172	HNF4A	MONET, MSI, GUILD	3
C2711227, C0015695	3178	HNRNPA1	MSI, GUILD	2
C2711227	3181	HNRNPA2B1	MSI, GUILD	2
C2711227, C0015695	3183	HNRNPC	MSI, GUILD	2
C3241937	3192	HNRNPU	MSI, GUILD	2
C3241937, C2711227, C0400966, C4529962, C0015695	3240	HP	MONET, GUILD	2
C3241937, C0400966	3273	HRG	0	0
C0400966	3276	PRMT1	MSI, GUILD	2
C0400966	3280	HES1	MSI, GUILD	2
C3241937, C2711227, C0400966, C0015695	3290	HSD11B1	0	0
C2711227	3295	HSD17B4	MSI, GUILD	2
C3241937, C2711227, C0400966	3303	HSPA1A	MSI, GUILD	2
C3241937, C2711227, C0400966	3304	HSPA1B	MSI, GUILD	2
C2711227, C0400966, C4529962, C0015695	3309	HSPA5	MSI, GUILD	2
C0400966, C4529962	3315	HSPB1	MSI, GUILD	2
C0400966	3320	HSP90AA1	MSI, GUILD, iPath	3
C2711227, C4529962	3329	HSPD1	MSI, GUILD	2
C2711227	3339	HSPG2	GUILD	1
C2711227, C0400966, C0015695	3356	HTR2A	0	0
C0400966	3357	HTR2B	0	0
C3241937, C2711227, C0400966	3371	TNC	0	0
C3241937, C0400966	3375	IAPP	0	0
C3241937, C2711227, C0400966	3376	IARS1	GUILD	1
C3241937, C0400966	3383	ICAM1	GUILD	1
C0400966	3418	IDH2	GUILD	1
C3241937, C2711227, C0400966, C0015695	3439	IFNA1	0	0
C2711227, C0400966	3440	IFNA2	MSI	1
C3241937, C2711227	3454	IFNAR1	GUILD	1
C3241937, C2711227, C0015695	3456	IFNB1	0	0
C3241937, C2711227, C0400966, C0015695	3458	IFNG	MSI	1
C3241937, C2711227, C0400966, C4529962, C0015695	3479	IGF1	MSI	1
C2711227, C0400966, C4529962, C0015695	3481	IGF2	0	0
C2711227, C0400966, C0015695	3484	IGFBP1	0	0
C2711227, C0400966, C4529962, C0015695	3485	IGFBP2	GUILD	1
C2711227, C0400966, C0015695	3486	IGFBP3	GUILD, iPath	2
C3241937, C2711227, C0400966, C4529962	3487	IGFBP4	iPath	1
C0400966	3488	IGFBP5	GUILD	1
C2711227	3489	IGFBP6	MONET	1
C2711227, C0400966, C0015695	3490	IGFBP7	MONET	1
C3241937, C2711227, C0015695	3491	CCN1	MSI	1
C2711227, C0400966, C0015695	3551	IKBKB	MONET, MSI, GUILD, iPath	4
C3241937, C2711227, C0400966, C0015695	3552	IL1A	0	0
C3241937, C2711227, C0400966, C0015695	3553	IL1B	MSI, GUILD	2
C2711227	3554	IL1R1	GUILD	1
C3241937	3557	IL1RN	MONET	1
C0400966	3558	IL2	GUILD	1
C3241937	3559	IL2RA	GUILD	1
C3241937, C2711227	3562	IL3	0	0
C3241937, C2711227, C0400966	3565	IL4	0	0
C3241937, C2711227, C0400966, C4529962, C0015695	3569	IL6	MSI, GUILD	2
C3241937, C2711227, C0015695	3572	IL6ST	MSI, GUILD	2
C3241937, C2711227, C0400966, C0015695	3576	CXCL8	MSI, GUILD	2
C3241937, C2711227, C0400966, C4529962, C0015695	3577	CXCR1	0	0
C3241937, C2711227, C0400966, C4529962, C0015695	3586	IL10	MSI, GUILD	2
C3241937, C2711227, C0400966	3589	IL11	GUILD	1
C3241937, C2711227	3596	IL13	GUILD	1
C2711227, C0015695	3597	IL13RA1	GUILD	1
C2711227, C0015695	3598	IL13RA2	GUILD	1
C2711227, C0400966, C0015695	3600	IL15	GUILD	1
C3241937	3601	IL15RA	GUILD	1
C3241937, C2711227, C0400966, C0015695	3605	IL17A	0	0
C3241937, C2711227, C0400966, C0015695	3606	IL18	MONET, MSI	2
C0015695	3611	ILK	MSI, GUILD	2
C3241937, C2711227, C0400966	3627	CXCL10	MSI	1
C3241937, C2711227, C0400966, C4529962, C0015695	3630	INS	MONET, MSI, GUILD	3
C3241937, C2711227, C0400966, C0015695	3638	INSIG1	MSI	1
C3241937, C2711227, C0400966, C4529962, C0015695	3643	INSR	MSI, GUILD, iPath	3
C3241937, C2711227	3654	IRAK1	MONET, MSI, GUILD	3
C3241937	3659	IRF1	MSI, GUILD	2
C2711227, C0015695	3661	IRF3	MONET, GUILD	2
C2711227, C0015695	3664	IRF6	0	0
C3241937	3665	IRF7	GUILD	1
C2711227, C0400966, C0015695	3667	IRS1	MSI, GUILD	2
C3241937	3685	ITGAV	MSI, GUILD	2
C3241937, C0015695	3688	ITGB1	MSI, GUILD	2
C0400966	3692	EIF6	GUILD	1
C2711227, C0400966	3700	ITIH4	0	0
C3241937	3702	ITK	GUILD	1
C0400966	3708	ITPR1	GUILD	1
C3241937, C2711227, C0400966	3709	ITPR2	0	0
C0400966	3710	ITPR3	GUILD	1
C2711227, C0400966, C4529962, C0015695	3717	JAK2	MSI, GUILD	2
C2711227, C0015695	3718	JAK3	GUILD	1
C3241937, C2711227, C0400966, C4529962, C0015695	3725	JUN	MSI, GUILD	2
C3241937, C0400966	3726	JUNB	GUILD	1
C3241937, C0400966	3727	JUND	GUILD	1
C0400966	3732	CD82	GUILD	1
C3241937, C2711227	3791	KDR	MSI, GUILD	2
C2711227, C0015695	3795	KHK	MSI	1
C0400966	3818	KLKB1	MONET	1
C2711227, C0015695	3827	KNG1	0	0
C3241937, C2711227, C0400966, C0015695	3875	KRT18	MONET, MSI, GUILD	3
C3241937, C2711227	3880	KRT19	GUILD	1
C0400966	3916	LAMP1	GUILD	1
C3241937, C2711227, C0400966, C0015695	3929	LBP	GUILD	1
C3241937	3931	LCAT	GUILD	1
C3241937, C2711227, C0400966, C0015695	3934	LCN2	0	0
C0400966	3936	LCP1	0	0
C3241937, C0400966	3945	LDHB	MSI, GUILD	2
C3241937, C2711227, C0400966, C0015695	3949	LDLR	MSI, GUILD	2
C3241937, C2711227, C0400966, C4529962, C0015695	3952	LEP	MONET, MSI, GUILD	3
C3241937, C2711227, C0400966, C0015695	3953	LEPR	GUILD	1
C3241937, C2711227, C0400966, C4529962, C0015695	3958	LGALS3	MSI, GUILD	2
C3241937, C2711227, C0400966, C4529962, C0015695	3959	LGALS3BP	MSI, GUILD	2
C3241937, C2711227, C0400966	3976	LIF	MSI, GUILD	2
C2711227, C0015695	3990	LIPC	MSI	1
C3241937, C2711227, C0400966, C0015695	3991	LIPE	0	0
C3241937, C2711227, C0400966, C0015695	3992	FADS1	0	0
C2711227, C0400966, C0015695	4000	LMNA	MSI, GUILD	2
C3241937, C0400966	4015	LOX	0	0
C2711227, C0400966, C0015695	4016	LOXL1	0	0
C0400966, C4529962	4017	LOXL2	0	0
C2711227, C0400966, C0015695	4023	LPL	GUILD	1
C2711227	4035	LRP1	MSI, GUILD, iPath	3
C0400966	4036	LRP2	GUILD	1
C3241937, C2711227, C0400966, C4529962, C0015695	4040	LRP6	MSI, GUILD	2
C3241937	4043	LRPAP1	GUILD	1
C0400966	4047	LSS	0	0
C2711227, C0015695	4049	LTA	0	0
C2711227, C0400966, C0015695	4057	LTF	MSI	1
C3241937, C0400966	4060	LUM	MONET	1
C3241937, C4529962	4072	EPCAM	MSI	1
C0400966	4082	MARCKS	MONET, GUILD	2
C3241937	4087	SMAD2	MSI, GUILD	2
C2711227, C4529962, C0015695	4088	SMAD3	MSI, GUILD	2
C3241937, C0400966	4089	SMAD4	MSI, GUILD	2
C3241937, C2711227, C0015695	4092	SMAD7	MSI, GUILD	2
C2711227, C0015695	4099	MAG	0	0
C3241937	4128	MAOA	MSI	1
C2711227	4141	MARS1	GUILD	1
C2711227, C0015695	4142	MAS1	MSI	1
C3241937, C2711227	4143	MAT1A	MSI	1
C3241937, C2711227, C0400966, C4529962, C0015695	4160	MC4R	0	0
C3241937, C2711227, C0015695	4170	MCL1	MSI, GUILD	2
C0400966	4179	CD46	0	0
C2711227, C0400966	4189	DNAJB9	0	0
C0400966	4193	MDM2	MSI, GUILD	2
C3241937, C0400966	4200	ME2	0	0
C3241937, C0400966	4210	MEFV	GUILD	1
C3241937, C2711227, C0400966, C4529962, C0015695	4217	MAP3K5	MONET, MSI, GUILD	3
C0400966	4218	RAB8A	GUILD	1
C2711227, C4529962, C0015695	4233	MET	GUILD	1
C0400966, C4529962	4282	MIF	MSI, GUILD	2
C0400966	4283	CXCL9	GUILD	1
C3241937, C2711227, C0400966, C0015695	4306	NR3C2	0	0
C3241937, C2711227	4312	MMP1	GUILD	1
C0400966	4316	MMP7	0	0
C3241937, C2711227, C0400966, C0015695	4318	MMP9	MSI	1
C0400966	4322	MMP13	0	0
C0400966	4351	MPI	0	0
C3241937, C2711227	4353	MPO	MSI	1
C2711227, C0400966, C4529962, C0015695	4357	MPST	MSI	1
C1850415, C1837256, C2711227	4358	MPV17	MONET, MSI	2
C3241937	4481	MSR1	GUILD	1
C0400966	4485	MST1	GUILD	1
C3241937	4486	MST1R	GUILD	1
C3241937, C2711227	4512	COX1	0	0
C3241937, C2711227, C0015695	4513	COX2	0	0
C4529962	4519	CYTB	0	0
C3241937, C2711227, C0400966, C4529962, C0015695	4524	MTHFR	0	0
C3241937, C2711227, C0015695	4535	ND1	0	0
C2711227, C0015695	4537	ND3	0	0
C3241937, C2711227, C0400966	4541	ND6	0	0
C3241937, C2711227, C0400966, C4529962, C0015695	4547	MTTP	0	0
C2711227	4548	MTR	0	0
C0400966	4582	MUC1	MSI, GUILD	2
C3241937, C2711227	4583	MUC2	0	0
C2711227, C0400966, C0015695	4591	TRIM37	MSI, GUILD	2
C3241937, C4529962	4595	MUTYH	0	0
C2711227, C0400966, C0015695	4609	MYC	MSI, GUILD	2
C3241937, C0400966	4615	MYD88	MSI, GUILD	2
C2711227, C0400966	4616	GADD45B	0	0
C3241937, C0400966	4633	MYL2	0	0
C0400966	4670	HNRNPM	GUILD	1
C3241937	4709	NDUFB3	0	0
C2711227, C0015695	4738	NEDD8	MSI, GUILD	2
C2711227, C0015695	4760	NEUROD1	0	0
C0400966	4771	NF2	MSI, GUILD	2
C3241937	4776	NFATC4	0	0
C3241937, C2711227, C0400966, C4529962, C0015695	4780	NFE2L2	MSI, GUILD, iPath	3
C3241937, C2711227, C0400966, C4529962, C0015695	4790	NFKB1	MSI, GUILD	2
C3241937	4792	NFKBIA	MONET, MSI, GUILD	3
C4529962	4793	NFKBIB	GUILD	1
C2711227, C0015695	4803	NGF	GUILD	1
C2711227, C0015695	4804	NGFR	GUILD	1
C3241937, C2711227, C0400966, C0015695	4837	NNMT	0	0
C2711227	4842	NOS1	GUILD	1
C3241937, C2711227, C0400966, C0015695	4843	NOS2	MSI, GUILD	2
C3241937, C2711227, C0400966, C4529962, C0015695	4846	NOS3	MSI, GUILD	2
C3241937, C2711227, C0400966, C4529962, C0015695	4851	NOTCH1	MSI, GUILD	2
C0400966	4852	NPY	0	0
C3241937, C0400966	4856	CCN3	MSI	1
C2711227, C0015695	4864	NPC1	0	0
C3241937	4880	NPPC	GUILD	1
C2711227, C0015695	4884	NPTX1	0	0
C3241937	4891	SLC11A2	0	0
C3241937, C0400966	4899	NRF1	GUILD	1
C2711227, C0400966, C0015695	4922	NTS	GUILD	1
C2711227, C0400966	4925	NUCB2	0	0
C2711227, C0015695	4929	NR4A2	0	0
C2711227	4942	OAT	GUILD	1
C3241937	4973	OLR1	0	0
C2711227	4976	OPA1	MSI, GUILD	2
C2711227, C0015695	4978	OPCML	0	0
C2711227, C0400966, C0015695	4982	TNFRSF11B	0	0
C0400966	5008	OSM	0	0
C2711227	5009	OTC	MONET, MSI	2
C2711227, C0400966	5020	OXT	0	0
C3241937, C2711227, C0400966, C0015695	5027	P2RX7	GUILD	1
C2711227, C0400966, C0015695	5029	P2RY2	0	0
C3241937	5034	P4HB	MSI, GUILD	2
C0400966	5045	FURIN	MONET	1
C0400966	5052	PRDX1	MSI, GUILD	2
C3241937, C2711227, C0400966, C4529962, C0015695	5054	SERPINE1	MONET, MSI, GUILD	3
C3241937, C2711227, C0400966	5055	SERPINB2	0	0
C2711227, C0015695	5071	PRKN	MONET, MSI, GUILD	3
C0400966	5091	PC	0	0
C0400966	5104	SERPINA5	0	0
C2711227, C0015695	5105	PCK1	MSI, GUILD	2
C2711227, C0400966	5106	PCK2	MSI, GUILD	2
C2711227, C0400966, C4529962, C0015695	5130	PCYT1A	0	0
C2711227, C0015695	5132	PDC	0	0
C0400966	5133	PDCD1	GUILD	1
C3241937, C2711227, C0400966, C0015695	5140	PDE3B	0	0
C0400966	5154	PDGFA	0	0
C3241937	5159	PDGFRB	MSI, GUILD	2
C3241937, C0400966	5166	PDK4	MONET	1
C2711227, C0015695	5167	ENPP1	MSI	1
C3241937, C2711227, C0400966, C0015695	5168	ENPP2	0	0
C3241937, C2711227, C0400966, C0015695	5176	SERPINF1	0	0
C0400966	5187	PER1	0	0
C2711227, C0015695	5203	PFDN4	0	0
C2711227	5205	ATP8B1	0	0
C2711227, C0015695	5209	PFKFB3	GUILD	1
C2711227	5236	PGM1	MSI	1
C3241937, C2711227	5243	ABCB1	iPath	1
C0400966	5244	ABCB4	0	0
C3241937	5245	PHB	MSI, GUILD	2
C2711227	5256	PHKA2	0	0
C2711227	5261	PHKG2	0	0
C2711227, C0400966, C4529962, C0015695	5265	SERPINA1	MONET, GUILD	2
C2711227, C0015695	5266	PI3	0	0
C3241937	5272	SERPINB9	GUILD	1
C2711227, C0015695	5287	PIK3C2B	GUILD	1
C2711227, C0400966, C4529962, C0015695	5290	PIK3CA	MSI, GUILD	2
C2711227, C0400966, C4529962, C0015695	5291	PIK3CB	GUILD	1
C2711227, C0400966, C4529962, C0015695	5293	PIK3CD	GUILD	1
C2711227, C0400966, C4529962, C0015695	5294	PIK3CG	GUILD	1
C3241937, C2711227, C0400966, C0015695	5295	PIK3R1	MSI, GUILD	2
C3241937, C2711227, C0015695	5300	PIN1	MSI, GUILD	2
C2711227, C0015695	5306	PITPNA	0	0
C3241937, C2711227, C0400966	5315	PKM	MSI, GUILD	2
C2711227, C0400966, C0015695	5316	PKNOX1	GUILD	1
C2711227, C4529962, C0015695	5319	PLA2G1B	0	0
C0400966	5328	PLAU	GUILD	1
C2711227, C0015695	5341	PLEK	0	0
C2711227, C0400966, C0015695	5346	PLIN1	0	0
C0400966	5360	PLTP	0	0
C3241937	5361	PLXNA1	0	0
C0400966	5367	PMCH	0	0
C2711227	5371	PML	MSI, GUILD	2
C2711227	5373	PMM2	GUILD	1
C0400966	5406	PNLIP	0	0
C2711227	5424	POLD1	MSI, GUILD	2
C1850415, C1837256	5428	POLG	MONET, MSI	2
C2711227, C0015695	5443	POMC	0	0
C3241937, C2711227, C0400966, C4529962, C0015695	5444	PON1	MSI, iPath	2
C0400966	5445	PON2	GUILD	1
C3241937	5451	POU2F1	MSI, GUILD, iPath	3
C3241937, C2711227	5460	POU5F1	MSI, GUILD	2
C3241937, C2711227, C0400966, C4529962, C0015695	5465	PPARA	MONET, MSI, GUILD, iPath	4
C3241937, C2711227, C0400966, C4529962, C0015695	5467	PPARD	MONET, MSI, GUILD, iPath	4
C3241937, C2711227, C0400966, C4529962, C0015695	5468	PPARG	MONET, MSI, GUILD, iPath	4
C2711227, C0400966, C0015695	5481	PPID	MSI, GUILD	2
C0400966	5502	PPP1R1A	0	0
C2711227, C0400966, C4529962, C0015695	5506	PPP1R3A	0	0
C0400966	5507	PPP1R3C	GUILD	1
C2711227, C0400966, C4529962, C0015695	5550	PREP	0	0
C3241937, C0400966	5551	PRF1	0	0
C2711227, C0015695	5554	PRH1	0	0
C2711227, C0015695	5555	PRH2	0	0
C3241937, C2711227, C0400966, C4529962, C0015695	5562	PRKAA1	MSI, GUILD, iPath	3
C3241937, C2711227, C0400966, C4529962, C0015695	5563	PRKAA2	MSI, GUILD	2
C3241937, C2711227, C0400966, C4529962, C0015695	5564	PRKAB1	MSI, GUILD	2
C2711227, C0015695	5579	PRKCB	GUILD	1
C0400966	5581	PRKCE	MSI, GUILD	2
C2711227, C0015695	5590	PRKCZ	MONET, MSI, GUILD, iPath	4
C0400966	5591	PRKDC	MSI, GUILD	2
C2711227, C0015695	5594	MAPK1	MSI, GUILD, iPath	3
C3241937, C2711227, C0015695	5595	MAPK3	MSI, GUILD, iPath	3
C3241937, C2711227, C0400966, C4529962, C0015695	5599	MAPK8	MSI, GUILD	2
C2711227, C0400966, C0015695	5603	MAPK13	MSI, GUILD	2
C2711227, C0400966, C0015695	5604	MAP2K1	MSI, GUILD	2
C2711227, C0015695	5609	MAP2K7	GUILD	1
C3241937	5610	EIF2AK2	GUILD	1
C2711227, C0400966, C0015695	5617	PRL	0	0
C0400966	5618	PRLR	0	0
C2711227, C0015695	5627	PROS1	MONET	1
C2711227, C0400966, C0015695	5657	PRTN3	GUILD	1
C0400966	5663	PSEN1	MSI, GUILD	2
C0400966	5670	PSG2	0	0
C0400966	5707	PSMD1	GUILD	1
C2711227	5725	PTBP1	MSI, GUILD	2
C3241937, C2711227, C0400966, C4529962, C0015695	5728	PTEN	MSI, GUILD	2
C0400966	5730	PTGDS	MONET, GUILD	2
C3241937, C2711227, C0400966, C0015695	5741	PTH	MSI	1
C3241937, C2711227, C0400966, C0015695	5743	PTGS2	GUILD	1
C2711227, C0015695	5744	PTHLH	GUILD	1
C2711227, C0015695	5764	PTN	0	0
C3241937, C2711227, C0400966, C0015695	5770	PTPN1	MSI, GUILD	2
C0400966, C4529962	5771	PTPN2	GUILD	1
C3241937, C2711227, C0015695	5777	PTPN6	MSI, GUILD	2
C3241937, C2711227, C0015695	5781	PTPN11	MSI, GUILD	2
C0400966	5789	PTPRD	GUILD	1
C2711227, C0400966	5806	PTX3	0	0
C2711227	5836	PYGL	0	0
C0400966	5858	PZP	0	0
C3241937, C2711227, C0400966, C0015695	5891	MOK	0	0
C2711227	5900	RALGDS	0	0
C2711227, C0015695	5906	RAP1A	MSI, GUILD	2
C2711227, C0015695	5914	RARA	MSI, GUILD	2
C0400966, C4529962	5925	RB1	MONET, MSI, GUILD	3
C4529962	5934	RBL2	GUILD	1
C3241937, C2711227, C0400966, C0015695	5950	RBP4	MONET, MSI, GUILD	3
C0400966, C4529962	5970	RELA	MSI, GUILD	2
C0400966	5972	REN	0	0
C3241937, C2711227, C0400966	5973	RENBP	0	0
C0400966	5978	REST	MSI, GUILD	2
C4529962	6005	RHAG	0	0
C2711227, C0400966, C0015695	6019	RLN2	0	0
C2711227, C0400966, C0015695	6046	BRD2	MONET, GUILD	2
C4529962	6048	RNF5	GUILD	1
C0400966	6049	RNF6	GUILD	1
C0400966	6093	ROCK1	GUILD	1
C3241937	6095	RORA	MSI, GUILD	2
C2711227, C0015695	6120	RPE	MSI	1
C3241937	6134	RPL10	GUILD	1
C0400966, C4529962	6147	RPL23A	GUILD	1
C0400966, C4529962	6156	RPL30	GUILD	1
C3241937, C0400966	6194	RPS6	MSI, GUILD	2
C3241937, C2711227, C0400966, C0015695	6198	RPS6KB1	MONET, GUILD	2
C2711227, C0015695	6256	RXRA	MONET, MSI, GUILD	3
C2711227, C0400966, C0015695	6272	SORT1	MSI, GUILD	2
C2711227, C0400966, C0015695	6275	S100A4	GUILD	1
C3241937, C0400966	6279	S100A8	GUILD	1
C2711227, C0400966, C0015695	6282	S100A11	GUILD	1
C0400966	6288	SAA1	0	0
C2711227	6296	ACSM3	0	0
C0400966	6300	MAPK12	GUILD	1
C3241937, C2711227, C0400966, C4529962, C0015695	6319	SCD	GUILD	1
C2711227	6341	SCO1	0	0
C0400966	6342	SCP2	GUILD	1
C0400966	6343	SCT	0	0
C4529962	6344	SCTR	0	0
C3241937, C2711227, C0400966, C0015695	6347	CCL2	MSI	1
C3241937, C0400966	6348	CCL3	MSI	1
C3241937, C2711227, C0400966, C0015695	6351	CCL4	MSI	1
C3241937, C2711227, C0400966	6352	CCL5	MSI, GUILD	2
C2711227, C0015695	6354	CCL7	0	0
C3241937, C4529962	6356	CCL11	0	0
C0400966	6361	CCL17	0	0
C3241937, C0400966	6364	CCL20	0	0
C3241937, C0400966	6374	CXCL5	0	0
C3241937	6382	SDC1	GUILD	1
C0400966	6385	SDC4	GUILD	1
C3241937, C2711227, C0400966	6401	SELE	0	0
C3241937, C2711227, C0400966	6402	SELL	0	0
C0400966	6403	SELP	0	0
C2711227, C0400966, C0015695	6414	SELENOP	GUILD	1
C0400966	6418	SET	MSI, GUILD	2
C0400966	6424	SFRP4	MSI	1
C3241937, C2711227, C0400966, C4529962	6425	SFRP5	MSI	1
C0400966	6442	SGCA	0	0
C2711227	6452	SH3BP2	GUILD	1
C2711227, C0400966, C0015695	6462	SHBG	MSI, GUILD	2
C2711227	6464	SHC1	MSI, GUILD, iPath	3
C3241937	6469	SHH	0	0
C4529962	6470	SHMT1	MSI	1
C2711227, C0400966	6480	ST6GAL1	0	0
C3241937, C2711227, C0400966, C0015695	6484	ST3GAL4	0	0
C3241937	6493	SIM2	0	0
C2711227	6497	SKI	MSI, GUILD	2
C2711227, C0015695	6506	SLC1A2	0	0
C2711227, C0400966, C0015695	6513	SLC2A1	GUILD	1
C3241937, C2711227, C0400966, C4529962, C0015695	6514	SLC2A2	0	0
C2711227, C0015695	6517	SLC2A4	0	0
C0400966	6520	SLC3A2	GUILD	1
C0400966	6523	SLC5A1	GUILD	1
C3241937, C2711227, C0400966	6524	SLC5A2	0	0
C0400966	6530	SLC6A2	0	0
C2711227, C0015695	6541	SLC7A1	GUILD	1
C3241937	6554	SLC10A1	0	0
C3241937, C2711227, C0400966, C0015695	6555	SLC10A2	0	0
C4529962	6576	SLC25A1	GUILD	1
C3241937	6579	SLCO1A2	0	0
C3241937	6580	SLC22A1	GUILD	1
C3241937	6581	SLC22A3	0	0
C0400966	6583	SLC22A4	0	0
C2711227, C0400966, C0015695	6584	SLC22A5	GUILD, iPath	2
C3241937, C2711227, C0400966, C0015695	6590	SLPI	MONET, GUILD	2
C3241937, C2711227, C0015695	6597	SMARCA4	MSI, GUILD	2
C2711227, C0015695	6609	SMPD1	0	0
C0400966	6614	SIGLEC1	0	0
C3241937, C0400966	6646	SOAT1	MSI	1
C3241937, C2711227, C0400966, C0015695	6647	SOD1	MSI, GUILD	2
C3241937, C2711227, C0400966, C4529962, C0015695	6648	SOD2	MSI, GUILD	2
C2711227, C0400966, C0015695	6657	SOX2	MSI, GUILD	2
C3241937, C2711227, C4529962, C0015695	6667	SP1	MSI, GUILD	2
C0400966	6678	SPARC	0	0
C3241937	6688	SPI1	MSI, GUILD	2
C2711227, C0400966, C0015695	6690	SPINK1	0	0
C3241937, C2711227, C0400966, C4529962, C0015695	6696	SPP1	MSI, GUILD	2
C3241937, C0400966	6713	SQLE	0	0
C2711227, C0015695	6717	SRI	GUILD	1
C2711227, C0400966	6718	AKR1D1	0	0
C3241937, C2711227, C0400966, C4529962, C0015695	6720	SREBF1	MSI, GUILD	2
C2711227, C0400966, C4529962, C0015695	6721	SREBF2	MSI, GUILD	2
C3241937, C2711227, C0015695	6742	SSBP1	MSI, GUILD	2
C0400966	6754	SSTR4	0	0
C2711227, C0400966, C4529962, C0015695	6770	STAR	0	0
C3241937	6772	STAT1	MONET, MSI, GUILD	3
C3241937, C2711227, C0400966, C4529962, C0015695	6774	STAT3	MSI, GUILD	2
C2711227, C0400966, C4529962	6776	STAT5A	MSI, GUILD, iPath	3
C2711227, C0400966, C4529962	6777	STAT5B	GUILD	1
C2711227	6783	SULT1E1	0	0
C2711227, C0015695	6786	STIM1	GUILD	1
C3241937, C2711227, C0400966, C0015695	6794	STK11	MONET, MSI, GUILD, iPath	4
C0400966	6799	SULT1A2	iPath	1
C3241937, C2711227	6817	SULT1A1	GUILD, iPath	2
C2711227	6818	SULT1A3	GUILD	1
C3241937	6819	SULT1C2	0	0
C2711227	6822	SULT2A1	GUILD	1
C3241937, C2711227	6850	SYK	MSI, GUILD	2
C3241937	6868	ADAM17	GUILD	1
C0400966	6872	TAF1	MONET, MSI, GUILD	3
C3241937, C2711227, C0400966, C0015695	6885	MAP3K7	MSI, GUILD	2
C3241937, C2711227, C0400966, C0015695	6901	TAFAZZIN	MSI	1
C2711227, C0015695	6907	TBL1X	MONET, MSI, GUILD	3
C0400966	6915	TBXA2R	0	0
C2711227, C4529962	6927	HNF1A	MSI, GUILD	2
C2711227, C0015695	6928	HNF1B	MSI, GUILD	2
C2711227, C0015695	6929	TCF3	MSI, GUILD	2
C3241937, C0400966, C0015695	6934	TCF7L2	MSI, GUILD	2
C2711227	6935	ZEB1	MSI, GUILD	2
C3241937, C0400966	6948	TCN2	GUILD	1
C3241937, C2711227, C0015695	7009	TMBIM6	0	0
C2711227, C0400966	7015	TERT	MONET, MSI, GUILD	3
C3241937, C2711227, C0400966, C0015695	7018	TF	MONET, GUILD, iPath	3
C1850415	7019	TFAM	MSI, GUILD	2
C2711227, C0400966, C0015695	7033	TFF3	0	0
C0400966	7035	TFPI	0	0
C0400966	7038	TG	0	0
C3241937, C2711227, C0400966, C0015695	7040	TGFB1	MSI, GUILD	2
C0400966	7041	TGFB1I1	GUILD	1
C0400966	7045	TGFBI	0	0
C2711227	7046	TGFBR1	MSI, GUILD	2
C2711227	7048	TGFBR2	GUILD	1
C3241937	7054	TH	0	0
C3241937, C2711227, C0400966, C4529962, C0015695	7057	THBS1	MSI, GUILD	2
C0400966	7058	THBS2	0	0
C2711227, C0015695	7064	THOP1	GUILD	1
C3241937, C2711227, C0015695	7068	THRB	MONET, MSI, GUILD, iPath	4
C3241937, C2711227	7069	THRSP	GUILD	1
C0400966	7070	THY1	0	0
C2711227, C0015695	7071	KLF10	GUILD	1
C3241937, C2711227, C0400966, C4529962, C0015695	7076	TIMP1	MSI	1
C0400966	7077	TIMP2	0	0
C3241937	7078	TIMP3	0	0
C3241937, C0400966	7082	TJP1	GUILD	1
C2711227, C0015695	7084	TK2	0	0
C0400966, C4529962	7092	TLL1	0	0
C0400966	7096	TLR1	0	0
C3241937, C0400966	7097	TLR2	MSI, GUILD	2
C3241937, C2711227, C0015695	7098	TLR3	GUILD	1
C3241937, C2711227, C0400966, C4529962, C0015695	7099	TLR4	MSI, GUILD	2
C3241937, C2711227	7100	TLR5	0	0
C2711227, C0400966, C0015695	7101	NR2E1	MSI	1
C0400966	7112	TMPO	GUILD	1
C3241937, C0400966	7114	TMSB4X	MSI, GUILD	2
C3241937, C2711227, C0400966, C4529962, C0015695	7124	TNF	MSI, GUILD	2
C3241937	7128	TNFAIP3	MSI, GUILD	2
C3241937, C0400966	7132	TNFRSF1A	MONET, MSI, GUILD	3
C0400966	7157	TP53	MSI, GUILD, iPath	3
C0400966	7158	TP53BP1	MONET, MSI, GUILD	3
C2711227, C0400966, C4529962	7166	TPH1	0	0
C0400966	7173	TPO	0	0
C0400966	7178	TPT1	MSI, GUILD	2
C0400966, C4529962	7180	CRISP2	0	0
C3241937	7182	NR2C2	MSI, GUILD	2
C2711227, C0015695	7190	HSP90B2P	0	0
C3241937	7222	TRPC3	0	0
C3241937, C2711227, C0015695	7225	TRPC6	0	0
C2711227, C0015695	7247	TSN	0	0
C0400966	7276	TTR	GUILD	1
C3241937	7293	TNFRSF4	0	0
C3241937, C0400966	7296	TXNRD1	GUILD	1
C0400966	7305	TYROBP	0	0
C2711227, C0400966	7329	UBE2I	MSI, GUILD	2
C3241937, C2711227	7337	UBE3A	MSI, GUILD	2
C3241937, C2711227, C0400966, C0015695	7350	UCP1	0	0
C3241937, C2711227, C0400966, C0015695	7351	UCP2	0	0
C3241937, C0400966	7352	UCP3	0	0
C0400966	7355	SLC35A2	0	0
C2711227, C0015695	7357	UGCG	0	0
C2711227, C4529962	7386	UQCRFS1	MSI	1
C3241937, C0400966	7412	VCAM1	MSI, GUILD	2
C2711227	7415	VCP	MSI, GUILD	2
C2711227, C0400966, C4529962, C0015695	7416	VDAC1	MSI, GUILD	2
C3241937, C2711227, C0400966, C4529962, C0015695	7421	VDR	MONET, MSI, GUILD	3
C3241937, C2711227, C0400966, C0015695	7422	VEGFA	MSI, GUILD	2
C2711227, C0400966, C0015695	7423	VEGFB	0	0
C0400966	7424	VEGFC	GUILD	1
C3241937, C0400966	7433	VIPR1	0	0
C3241937, C2711227, C0400966, C0015695	7436	VLDLR	0	0
C3241937	7448	VTN	MSI, GUILD	2
C3241937, C2711227, C0015695	7450	VWF	GUILD	1
C2711227, C0015695	7462	LAT2	0	0
C2711227, C0015695	7465	WEE1	GUILD	1
C3241937	7490	WT1	MSI, GUILD	2
C3241937, C2711227, C0400966	7494	XBP1	MSI, GUILD	2
C2711227, C0400966, C4529962, C0015695	7498	XDH	0	0
C3241937, C0400966, C4529962	7504	XK	0	0
C2711227	7518	XRCC4	0	0
C0400966	7528	YY1	MONET, MSI, GUILD	3
C0400966	7536	SF1	GUILD	1
C2711227, C0015695	7538	ZFP36	MSI, GUILD	2
C3241937, C2711227, C0400966, C4529962, C0015695	7555	CNBP	MSI, GUILD	2
C2711227, C0015695	7586	ZKSCAN1	0	0
C0400966	7702	ZNF143	0	0
C0400966	7704	ZBTB16	MSI, GUILD	2
C2711227	7798	LUZP1	0	0
C2711227, C0400966, C0015695	7840	ALMS1	0	0
C0400966	7852	CXCR4	GUILD	1
C2711227, C0400966, C0015695	7873	MANF	0	0
C2711227, C0015695	7884	SLBP	0	0
C2711227, C0400966, C4529962, C0015695	7941	PLA2G7	MONET, MSI	2
C3241937, C2711227, C0400966, C4529962, C0015695	7942	TFEB	0	0
C3241937	8013	NR4A3	0	0
C3241937, C0400966	8027	STAM	GUILD	1
C2711227, C0400966, C0015695	8074	FGF23	0	0
C2711227	8085	KMT2D	GUILD	1
C0400966	8140	SLC7A5	GUILD	1
C3241937	8174	MADCAM1	0	0
C0400966	8200	GDF5	0	0
C2711227, C0015695	8204	NRIP1	MONET, MSI, GUILD	3
C3241937, C2711227, C0015695	8289	ARID1A	MSI, GUILD	2
C3241937	8294	H4C9	MSI, GUILD	2
C2711227, C0015695	8309	ACOX2	MSI	1
C2711227, C0015695	8322	FZD4	0	0
C2711227, C0015695	8324	FZD7	0	0
C0400966, C4529962	8349	H2BC21	0	0
C3241937	8359	H4C1	MSI, GUILD	2
C3241937	8360	H4C4	MSI, GUILD	2
C3241937	8361	H4C6	MSI, GUILD	2
C3241937	8362	H4C12	MSI, GUILD	2
C3241937	8363	H4C11	MSI, GUILD	2
C3241937	8364	H4C3	MSI, GUILD	2
C3241937	8365	H4C8	MSI, GUILD	2
C3241937	8366	H4C2	MSI, GUILD	2
C3241937	8367	H4C5	MSI, GUILD	2
C3241937	8368	H4C13	MSI, GUILD	2
C3241937	8370	H4C14	MSI, GUILD	2
C3241937, C0400966	8395	PIP5K1B	0	0
C3241937, C2711227, C0400966, C0015695	8398	PLA2G6	0	0
C3241937, C2711227, C0400966, C0015695	8408	ULK1	MONET, GUILD	2
C2711227, C0015695	8424	BBOX1	0	0
C3241937, C0400966	8428	STK24	GUILD	1
C3241937, C2711227, C0400966, C4529962, C0015695	8431	NR0B2	MONET, MSI, GUILD	3
C2711227, C0015695	8435	SOAT2	0	0
C0400966	8452	CUL3	MSI, GUILD, iPath	3
C2711227, C0400966	8463	TEAD2	GUILD	1
C2711227, C0015695	8473	OGT	MSI, GUILD	2
C3241937, C0400966	8490	RGS5	0	0
C3241937	8505	PARG	0	0
C2711227	8510	MMP23B	0	0
C2711227	8514	KCNAB2	0	0
C3241937	8517	IKBKG	MSI, GUILD	2
C0400966	8529	CYP4F2	GUILD	1
C2711227, C0015695	8553	BHLHE40	MSI, GUILD	2
C2711227	8565	YARS1	GUILD	1
C0400966	8600	TNFSF11	MSI, GUILD	2
C2711227, C0015695	8614	STC2	0	0
C0400966	8626	TP63	MSI, GUILD	2
C3241937, C0400966	8630	HSD17B6	0	0
C2711227, C0400966, C0015695	8639	AOC3	MSI, iPath	2
C3241937, C2711227, C0400966, C0015695	8647	ABCB11	0	0
C3241937, C2711227, C0400966, C4529962, C0015695	8651	SOCS1	GUILD	1
C4529962	8654	PDE5A	0	0
C3241937	8659	ALDH4A1	MSI, GUILD	2
C3241937, C2711227, C0400966, C4529962, C0015695	8660	IRS2	MSI, GUILD	2
C2711227, C0400966	8678	BECN1	MONET, GUILD	2
C3241937, C2711227, C0400966, C0015695	8694	DGAT1	0	0
C3241937, C2711227	8714	ABCC3	0	0
C3241937, C2711227, C0015695	8720	MBTPS1	MSI	1
C2711227, C0400966, C4529962, C0015695	8731	RNMT	0	0
C3241937, C2711227, C0400966, C4529962	8737	RIPK1	MSI, GUILD	2
C2711227, C0015695	8740	TNFSF14	GUILD	1
C0400966	8743	TNFSF10	GUILD	1
C2711227, C0015695	8773	SNAP23	0	0
C0400966	8788	DLK1	0	0
C0400966	8792	TNFRSF11A	GUILD	1
C3241937, C4529962	8795	TNFRSF10B	GUILD	1
C2711227, C0400966	8800	PEX11A	0	0
C2711227	8802	SUCLG1	MSI, GUILD	2
C2711227, C0015695	8804	CREG1	0	0
C2711227, C0400966	8805	TRIM24	MONET, MSI, GUILD	3
C3241937, C2711227, C0400966, C0015695	8824	CES2	0	0
C2711227	8829	NRP1	GUILD	1
C0400966	8835	SOCS2	0	0
C2711227, C0400966, C0015695	8836	GGH	0	0
C3241937, C2711227, C0400966	8837	CFLAR	GUILD	1
C2711227, C0400966, C0015695	8840	CCN4	0	0
C0400966	8841	HDAC3	MONET, MSI, GUILD, iPath	4
C3241937, C2711227	8854	ALDH1A2	MSI	1
C2711227, C0400966, C0015695	8856	NR1I2	MONET, MSI, GUILD	3
C2711227	8862	APLN	0	0
C0400966, C4529962	8877	SPHK1	GUILD	1
C3241937, C2711227, C4529962	8878	SQSTM1	MONET, MSI, GUILD	3
C2711227, C0400966	8882	ZPR1	GUILD	1
C0400966	8988	HSPB3	0	0
C0400966	8991	SELENBP1	0	0
C0400966	8997	KALRN	0	0
C2711227	9020	MAP3K14	GUILD	1
C2711227, C0400966, C0015695	9021	SOCS3	GUILD	1
C2711227, C0015695	9039	UBA3	GUILD	1
C2711227	9054	NFS1	GUILD	1
C3241937	9061	PAPSS1	0	0
C3241937, C2711227	9092	SART1	GUILD	1
C2711227, C0400966, C0015695	9100	USP10	0	0
C0400966	9104	RGN	0	0
C3241937	9113	LATS1	MSI, GUILD	2
C2711227, C0400966, C0015695	9146	HGS	MSI, GUILD	2
C2711227, C0400966, C0015695	9159	PCSK7	0	0
C2711227, C0400966, C0015695	9170	LPAR2	GUILD	1
C0400966	9197	SLC33A1	0	0
C2711227, C0400966, C0015695	9235	IL32	0	0
C2711227, C0015695	9246	UBE2L6	MSI, GUILD	2
C3241937, C2711227, C0400966, C0015695	9290	GPR55	0	0
C3241937	9294	S1PR2	0	0
C2711227	9314	KLF4	MSI, GUILD	2
C3241937, C2711227, C0400966	9315	NREP	0	0
C2711227, C0400966, C4529962, C0015695	9332	CD163	0	0
C2711227, C0400966	9340	GLP2R	0	0
C0400966	9341	VAMP3	GUILD	1
C0400966	9362	CPNE6	0	0
C3241937, C2711227, C0400966, C4529962, C0015695	9370	ADIPOQ	MSI	1
C0015695	9388	LIPG	0	0
C3241937, C0400966	9415	FADS2	GUILD	1
C3241937, C2711227, C0400966, C4529962, C0015695	9420	CYP7B1	0	0
C3241937	9429	ABCG2	0	0
C0400966	9447	AIM2	MSI, GUILD	2
C2711227	9448	MAP4K4	GUILD	1
C2711227, C0400966, C0015695	9451	EIF2AK3	GUILD	1
C0400966	9453	GGPS1	0	0
C2711227, C4529962	9467	SH3BP5	0	0
C2711227, C0015695	9474	ATG5	GUILD	1
C0400966	9480	ONECUT2	0	0
C0400966, C4529962	9516	LITAF	GUILD	1
C3241937, C2711227, C0400966, C4529962, C0015695	9518	GDF15	0	0
C2711227, C0400966	9555	MACROH2A1	MSI	1
C2711227, C0400966, C0015695	9575	CLOCK	MSI	1
C2711227	9577	BABAM2	GUILD	1
C0400966	9588	PRDX6	MSI, GUILD	2
C2711227, C0015695	9611	NCOR1	MONET, MSI, GUILD	3
C3241937, C0400966	9619	ABCG1	0	0
C0400966	9628	RGS6	0	0
C2711227, C0015695	9636	ISG15	MSI, GUILD	2
C0400966	9641	IKBKE	MSI, GUILD	2
C2711227, C0015695	9681	DEPDC5	0	0
C0400966	9685	CLINT1	GUILD	1
C2711227	9695	EDEM1	GUILD	1
C2711227, C0015695	9722	NOS1AP	GUILD	1
C2711227	9757	KMT2B	GUILD	1
C3241937	9759	HDAC4	MSI, GUILD, iPath	3
C2711227, C0015695	9807	IP6K1	0	0
C3241937, C2711227, C0400966, C4529962, C0015695	9817	KEAP1	MSI, GUILD	2
C2711227, C4529962, C0015695	9846	GAB2	GUILD	1
C0400966, C4529962	9890	PLPPR4	0	0
C2711227, C0015695	9915	ARNT2	GUILD	1
C0400966	9926	LPGAT1	0	0
C3241937	9927	MFN2	0	0
C2711227, C0015695	9961	MVP	GUILD	1
C3241937	9962	SLC23A2	0	0
C3241937	9963	SLC23A1	GUILD	1
C3241937, C2711227, C0400966, C4529962, C0015695	9965	FGF19	MSI	1
C2711227, C0400966, C4529962, C0015695	9970	NR1I3	MONET	1
C3241937, C2711227, C0400966, C4529962, C0015695	9971	NR1H4	MONET, MSI, GUILD	3
C0400966	9978	RBX1	MSI, GUILD	2
C0400966	10009	ZBTB33	GUILD	1
C2711227, C0015695	10010	TANK	MSI, GUILD	2
C2711227, C0015695	10011	SRA1	MSI, GUILD	2
C2711227, C0015695	10013	HDAC6	MSI, GUILD	2
C2711227, C0015695	10014	HDAC5	MSI, GUILD	2
C2711227	10056	FARSB	GUILD	1
C2711227	10058	ABCB6	0	0
C3241937, C2711227, C0400966, C0015695	10062	NR1H3	MONET, MSI, GUILD	3
C3241937, C0400966	10082	GPC6	0	0
C2711227, C0400966, C0015695	10105	PPIF	MSI	1
C1850415, C0400966	10128	LRPPRC	MSI, GUILD	2
C2711227, C0015695	10134	BCAP31	MSI, GUILD, iPath	3
C3241937, C2711227, C0400966, C4529962, C0015695	10135	NAMPT	MSI	1
C2711227, C0015695	10159	ATP6AP2	0	0
C3241937, C2711227, C0015695	10162	LPCAT3	0	0
C2711227, C0400966, C0015695	10165	SLC25A13	MSI, GUILD	2
C0400966	10170	DHRS9	0	0
C2711227, C0400966, C4529962, C0015695	10196	PRMT3	GUILD	1
C2711227, C0015695	10197	PSME3	GUILD	1
C4529962	10216	PRG4	0	0
C2711227, C0400966, C4529962, C0015695	10220	GDF11	0	0
C3241937, C0400966, C4529962	10221	TRIB1	MSI, GUILD	2
C2711227, C0400966, C0015695	10226	PLIN3	GUILD	1
C2711227, C0015695	10254	STAM2	GUILD	1
C2711227, C0015695	10257	ABCC4	0	0
C0400966, C4529962	10272	FSTL3	0	0
C2711227	10277	UBE4B	GUILD	1
C0400966	10288	LILRB2	GUILD	1
C2711227, C0015695	10295	BCKDK	GUILD	1
C3241937, C2711227, C0015695	10327	AKR1A1	MSI, iPath	2
C3241937, C2711227, C0400966	10333	TLR6	GUILD	1
C3241937	10381	TUBB3	MSI, GUILD	2
C0400966	10388	SYCP2	0	0
C3241937, C2711227, C0400966, C4529962, C0015695	10400	PEMT	0	0
C2711227, C0015695	10411	RAPGEF3	0	0
C3241937, C0400966	10413	YAP1	MSI, GUILD	2
C2711227, C0015695	10419	PRMT5	MSI, GUILD	2
C0400966	10451	VAV3	GUILD	1
C3241937, C0400966	10455	ECI2	0	0
C0400966	10461	MERTK	GUILD	1
C4529962	10468	FST	0	0
C2711227, C0015695	10488	CREB3	MSI, GUILD	2
C0400966, C4529962	10494	STK25	MSI, GUILD	2
C3241937	10499	NCOA2	MONET, MSI, GUILD	3
C2711227, C0400966, C0015695	10533	ATG7	MSI, GUILD	2
C3241937, C2711227, C0400966	10549	PRDX4	GUILD	1
C2711227, C0015695	10555	AGPAT2	0	0
C0400966	10587	TXNRD2	0	0
C3241937, C2711227, C0015695	10599	SLCO1B1	0	0
C0400966	10613	ERLIN1	GUILD	1
C2711227, C0015695	10625	IVNS1ABP	0	0
C3241937, C2711227, C0400966, C4529962, C0015695	10628	TXNIP	MSI, GUILD	2
C2711227	10630	PDPN	0	0
C3241937, C2711227, C0400966, C0015695	10631	POSTN	0	0
C2711227, C4529962, C0015695	10644	IGF2BP2	GUILD	1
C1837256	10651	MTX2	MSI	1
C4529962	10657	KHDRBS1	GUILD	1
C2711227, C0015695	10658	CELF1	GUILD	1
C2711227, C0400966, C0015695	10663	CXCR6	0	0
C0400966	10664	CTCF	MSI, GUILD	2
C3241937, C2711227, C0400966, C0015695	10673	TNFSF13B	0	0
C2711227, C0400966, C0015695	10682	EBP	0	0
C3241937, C2711227	10803	CCR9	0	0
C2711227, C0015695	10855	HPSE	0	0
C2711227, C0015695	10857	PGRMC1	GUILD	1
C0400966	10858	CYP46A1	0	0
C2711227, C0015695	10859	LILRB1	MSI, GUILD	2
C3241937, C0400966, C4529962	10874	NMU	0	0
C3241937, C2711227, C0400966, C0015695	10875	FGL2	0	0
C3241937, C2711227, C0400966, C4529962, C0015695	10891	PPARGC1A	MONET, MSI, GUILD	3
C0400966	10903	MTMR11	0	0
C2711227, C0015695	10911	UTS2	0	0
C2711227	10919	EHMT2	MSI, GUILD	2
C3241937	10922	FASTK	0	0
C2711227, C4529962	10928	RALBP1	MSI, GUILD	2
C2711227, C0015695	10933	MORF4L1	MSI, GUILD	2
C0400966	10959	TMED2	0	0
C2711227, C0015695	10966	RAB40B	0	0
C2711227, C0015695	10981	RAB32	0	0
C3241937, C0400966, C4529962	10998	SLC27A5	0	0
C2711227, C0400966, C0015695	11001	SLC27A2	MSI	1
C0400966	11006	LILRB4	0	0
C2711227, C0400966, C4529962, C0015695	11019	LIAS	0	0
C2711227, C0400966, C0015695	11035	RIPK3	MONET, GUILD	2
C2711227, C0015695	11067	DEPP1	0	0
C2711227, C0015695	11072	DUSP14	GUILD	1
C4529962	11075	STMN2	GUILD	1
C3241937, C2711227, C0400966, C0015695	11082	ESM1	0	0
C2711227	11092	SPACA9	0	0
C3241937, C2711227	11093	ADAMTS13	GUILD	1
C2711227, C4529962	11103	KRR1	GUILD	1
C2711227	11128	POLR3A	MSI	1
C2711227	11167	FSTL1	0	0
C3241937	11186	RASSF1	MONET, GUILD	2
C2711227, C0400966, C0015695	11266	DUSP12	GUILD	1
C2711227, C0015695	11274	USP18	GUILD	1
C3241937	11309	SLCO2B1	iPath	1
C2711227, C0015695	11315	PARK7	MSI, GUILD	2
C2711227, C0015695	11320	MGAT4A	0	0
C0400966	11326	VSIG4	0	0
C2711227, C0400966, C0015695	11343	MGLL	0	0
C3241937, C0400966, C4529962	22861	NLRP1	GUILD	1
C3241937, C0400966	22882	ZHX2	MONET, GUILD	2
C3241937	22914	KLRK1	0	0
C2711227, C4529962, C0015695	22926	ATF6	MSI, GUILD	2
C2711227, C0400966, C0015695	22933	SIRT2	MSI, GUILD	2
C2711227	22934	RPIA	GUILD	1
C2711227, C4529962, C0015695	22937	SCAP	MSI	1
C3241937, C0400966	22943	DKK1	MSI, GUILD	2
C2711227	23013	SPEN	MSI, GUILD	2
C0400966	23022	PALLD	0	0
C2711227, C0015695	23030	KDM4B	0	0
C2711227, C0015695	23035	PHLPP2	0	0
C0400966	23049	SMG1	GUILD	1
C4529962	23089	PEG10	0	0
C2711227, C0400966	23127	COLGALT2	0	0
C0400966	23135	KDM6B	0	0
C2711227	23158	TBC1D9	0	0
C2711227, C0015695	23164	MPRIP	GUILD	1
C3241937, C2711227, C0400966, C0015695	23175	LPIN1	0	0
C0400966	23178	PASK	0	0
C3241937	23212	RRS1	0	0
C2711227, C0015695	23235	SIK2	GUILD	1
C3241937, C0400966	23236	PLCB1	0	0
C3241937	23367	LARP1	0	0
C2711227, C0400966, C0015695	23373	CRTC1	0	0
C3241937	23405	DICER1	GUILD	1
C2711227, C0400966	23408	SIRT5	MSI	1
C0400966	23409	SIRT4	0	0
C2711227, C0400966, C4529962, C0015695	23410	SIRT3	MSI, GUILD	2
C3241937, C2711227, C0400966, C4529962, C0015695	23411	SIRT1	MONET, MSI, GUILD	3
C3241937, C2711227, C0400966, C0015695	23417	MLYCD	MSI	1
C0400966	23452	ANGPTL2	GUILD	1
C2711227, C0015695	23516	SLC39A14	0	0
C2711227, C0400966, C0015695	23558	WBP2	GUILD	1
C2711227, C0015695	23566	LPAR3	0	0
C0400966	23576	DDAH1	0	0
C2711227, C0015695	23586	DDX58	GUILD	1
C3241937, C2711227, C0400966	23597	ACOT9	0	0
C4529962	23636	NUP62	MSI, GUILD	2
C2711227, C0015695	23657	SLC7A11	0	0
C2711227	23753	SDF2L1	GUILD	1
C3241937, C0400966	23765	IL17RA	0	0
C2711227	24148	PRPF6	GUILD	1
C2711227, C0015695	25805	BAMBI	0	0
C3241937, C2711227, C0400966, C4529962, C0015695	25813	SAMM50	MSI, GUILD	2
C2711227, C0400966	25816	TNFAIP8	0	0
C2711227, C0400966, C4529962, C0015695	25824	PRDX5	MSI, GUILD	2
C2711227, C0015695	25828	TXN2	GUILD	1
C2711227, C0015695	25886	POC1A	0	0
C3241937, C2711227, C0400966	25937	WWTR1	MSI, GUILD	2
C2711227	25942	SIN3A	MSI, GUILD, iPath	3
C2711227, C0400966, C0015695	25970	SH2B1	GUILD	1
C2711227	25976	TIPARP	0	0
C2711227	25984	KRT23	0	0
C3241937, C2711227, C0400966	25987	TSKU	0	0
C2711227	26007	TKFC	GUILD	1
C3241937, C0400966	26047	CNTNAP2	0	0
C0400966	26060	APPL1	MSI, GUILD	2
C2711227, C0400966	26108	PYGO1	GUILD	1
C2711227	26119	LDLRAP1	GUILD	1
C3241937, C0400966	26133	TRPC4AP	0	0
C4529962	26137	ZBTB20	0	0
C4529962	26227	PHGDH	GUILD	1
C3241937, C2711227, C0400966, C4529962, C0015695	26291	FGF21	0	0
C3241937, C2711227, C4529962, C0015695	26471	NUPR1	0	0
C3241937, C2711227, C0400966, C4529962, C0015695	26503	SLC17A5	0	0
C3241937	26504	CNNM4	0	0
C0400966	26524	LATS2	GUILD	1
C0400966	26574	AATF	GUILD	1
C2711227, C0015695	26580	BSCL2	0	0
C0400966, C4529962	26585	GREM1	0	0
C0015695	26762	HAVCR1	0	0
C2711227, C0400966, C0015695	26998	FETUB	0	0
C2711227, C0015695	27034	ACAD8	MSI	1
C3241937	27035	NOX1	MSI	1
C0400966	27036	SIGLEC7	0	0
C2711227, C0015695	27044	SND1	GUILD	1
C3241937, C2711227, C0400966	27113	BBC3	GUILD	1
C0400966	27163	NAAA	0	0
C3241937	27165	GLS2	MONET, MSI	2
C0400966	27178	IL37	0	0
C1850415	27183	VPS4A	MSI, GUILD	2
C3241937, C2711227, C0400966, C4529962, C0015695	27232	GNMT	GUILD	1
C3241937	27233	SULT1C4	0	0
C0400966	27241	BBS9	0	0
C3241937, C2711227, C0400966	27306	HPGDS	GUILD	1
C2711227, C0400966, C4529962, C0015695	27329	ANGPTL3	0	0
C2711227, C0015695	27342	RABGEF1	GUILD	1
C0400966	27430	MAT2B	GUILD	1
C3241937	28234	SLCO1B3	MONET	1
C3241937	28935	IGKV1-27	0	0
C1850415, C2711227	28976	ACAD9	MSI	1
C3241937, C2711227, C0400966, C0015695	29072	SETD2	MSI, GUILD	2
C0400966	29103	DNAJC15	0	0
C0400966	29108	PYCARD	MSI, GUILD	2
C3241937, C0400966	29110	TBK1	GUILD	1
C0400966	29119	CTNNA3	GUILD	1
C0400966	29760	BLNK	GUILD	1
C0400966	29761	USP25	GUILD, iPath	2
C0400966	29780	PARVB	0	0
C2711227, C0400966, C0015695	29803	REPIN1	MSI	1
C3241937	29881	NPC1L1	0	0
C2711227, C0400966, C0015695	29886	SNX8	GUILD	1
C2711227	29887	SNX10	0	0
C2711227, C0015695	29922	NME7	GUILD	1
C4529962	29923	HILPDA	0	0
C2711227, C0400966, C0015695	29956	CERS2	GUILD	1
C2711227, C0400966, C0015695	29974	A1CF	0	0
C2711227, C0400966, C0015695	29984	RHOD	0	0
C3241937, C0400966	29988	SLC2A8	0	0
C2711227, C0400966	30061	SLC40A1	GUILD	1
C2711227	30835	CD209	0	0
C1837256	50484	RRM2B	MSI, GUILD	2
C0400966	50486	G0S2	0	0
C3241937, C0400966	50507	NOX4	MSI	1
C0400966	50604	IL20	0	0
C3241937, C2711227, C0400966, C4529962	50616	IL22	0	0
C2711227	50852	TRAT1	0	0
C2711227, C0015695	50865	HEBP1	0	0
C2711227, C0400966, C0015695	50964	SOST	MSI	1
C3241937	51035	UBXN1	GUILD	1
C2711227	51081	MRPS7	0	0
C3241937, C2711227, C0400966, C0015695	51085	MLXIPL	MSI, GUILD	2
C0400966	51092	SIDT2	0	0
C3241937, C2711227, C0400966, C0015695	51094	ADIPOR1	MSI	1
C2711227, C0400966, C4529962, C0015695	51099	ABHD5	0	0
C1837256	51103	NDUFAF1	MSI	1
C2711227	51119	SBDS	0	0
C2711227	51128	SAR1B	0	0
C3241937, C2711227, C0015695	51129	ANGPTL4	GUILD	1
C2711227, C0400966, C0015695	51141	INSIG2	0	0
C0400966	51151	SLC45A2	0	0
C4529962	51164	DCTN4	0	0
C2711227, C0015695	51176	LEF1	MSI, GUILD	2
C2711227, C0015695	51177	PLEKHO1	0	0
C2711227	51251	NT5C3A	0	0
C0400966	51274	KLF3	GUILD	1
C2711227, C0015695	51280	GOLM1	0	0
C3241937, C0400966	51284	TLR7	0	0
C2711227	51311	TLR8	0	0
C2711227, C0015695	51316	PLAC8	0	0
C2711227, C0400966, C0015695	51340	CRNKL1	0	0
C0400966	51366	UBR5	GUILD	1
C0400966	51421	AMOTL2	GUILD	1
C2711227	51497	NELFCD	0	0
C3241937	51506	UFC1	0	0
C2711227	51520	LARS1	GUILD	1
C2711227, C0015695	51540	SCLY	0	0
C2711227, C4529962, C0015695	51547	SIRT7	MSI, GUILD	2
C3241937, C2711227, C0400966, C4529962, C0015695	51548	SIRT6	MSI, GUILD	2
C0400966	51561	IL23A	0	0
C0400966	51566	ARMCX3	0	0
C3241937	51569	UFM1	0	0
C3241937	51588	PIAS4	MSI, GUILD	2
C2711227	51651	PTRH2	0	0
C2711227	51655	RASD1	0	0
C0400966	51660	MPC1	0	0
C3241937, C2711227, C0400966, C0015695	51738	GHRL	MSI	1
C0400966	51742	ARID4B	MSI, GUILD	2
C0400966	51747	LUC7L3	GUILD	1
C2711227, C0015695	53630	BCO1	0	0
C0400966	53831	GPR84	0	0
C0400966	53917	RAB24	0	0
C2711227, C0015695	54097	FAM3B	0	0
C3241937, C2711227, C0400966, C4529962	54106	TLR9	MSI	1
C2711227, C0400966, C0015695	54205	CYCS	GUILD	1
C3241937, C0400966	54209	TREM2	GUILD	1
C2711227, C0015695	54386	TERF2IP	MSI, GUILD	2
C2711227, C0400966, C0015695	54455	FBXO42	0	0
C3241937	54461	FBXW5	GUILD	1
C2711227	54496	PRMT7	0	0
C0400966	54535	CCHCR1	GUILD	1
C2711227, C0015695	54583	EGLN1	MONET, MSI, GUILD	3
C3241937	54600	UGT1A9	iPath	1
C0400966	54658	UGT1A1	iPath	1
C3241937, C2711227, C4529962, C0015695	54675	CRLS1	0	0
C0400966	54677	CROT	MONET, MSI, iPath	3
C3241937, C2711227	54741	LEPROT	GUILD	1
C3241937, C0400966	54815	GATAD2A	MSI, GUILD	2
C2711227, C0015695	54884	RETSAT	0	0
C2711227	54897	CASZ1	GUILD	1
C0400966	54901	CDKAL1	0	0
C0400966	54905	CYP2W1	0	0
C0400966	54915	YTHDF1	GUILD	1
C2711227, C0015695	54941	RNF125	GUILD	1
C2711227, C0015695	54981	NMRK1	0	0
C2711227	55005	RMND1	0	0
C3241937	55054	ATG16L1	MSI, GUILD	2
C0400966	55107	ANO1	0	0
C0400966	55124	PIWIL2	0	0
C0400966	55198	APPL2	GUILD	1
C2711227, C0015695	55213	RCBTB1	0	0
C2711227	55226	NAT10	GUILD	1
C3241937, C0400966	55249	YY1AP1	GUILD	1
C3241937	55252	ASXL2	0	0
C0400966	55280	CWF19L1	0	0
C3241937, C2711227, C0400966	55294	FBXW7	MSI, GUILD, iPath	3
C3241937, C2711227, C0015695	55328	RNLS	0	0
C3241937	55331	ACER3	0	0
C2711227	55332	DRAM1	GUILD	1
C0400966	55349	CHDH	0	0
C3241937, C0400966	55554	KLK15	0	0
C2711227, C0015695	55576	STAB2	0	0
C0400966	55636	CHD7	MSI, GUILD	2
C1850415, C1837256	55687	TRMU	MONET, MSI	2
C0400966	55701	ARHGEF40	GUILD	1
C1850415	55768	NGLY1	MSI, GUILD	2
C3241937, C0400966	55788	LMBRD1	0	0
C2711227, C0015695	55821	ALLC	0	0
C2711227, C0400966, C0015695	55856	ACOT13	0	0
C0400966	55914	ERBIN	GUILD	1
C2711227, C0015695	55937	APOM	0	0
C3241937, C2711227, C0400966	55959	SULF2	0	0
C2711227, C0400966	56034	PDGFC	0	0
C0400966	56288	PARD3	GUILD	1
C0400966	56339	METTL3	MSI, GUILD	2
C2711227, C0015695	56667	MUC13	0	0
C3241937	56670	SUCNR1	0	0
C3241937, C2711227, C0400966, C4529962, C0015695	56729	RETN	0	0
C2711227, C0015695	56848	SPHK2	0	0
C0400966	56947	MFF	0	0
C3241937, C2711227, C0400966, C4529962, C0015695	56994	CHPT1	0	0
C0400966	56999	ADAMTS9	0	0
C0400966	57007	ACKR3	GUILD	1
C2711227, C0400966, C0015695	57016	AKR1B10	MSI	1
C3241937	57045	TWSG1	0	0
C3241937, C2711227, C0400966, C0015695	57104	PNPLA2	MSI	1
C2711227	57128	LYRM4	0	0
C2711227	57152	SLURP1	0	0
C2711227, C0400966, C0015695	57154	SMURF1	MSI, GUILD	2
C0400966	57406	ABHD6	0	0
C2711227, C0015695	57505	AARS2	MSI, GUILD	2
C2711227, C0400966, C0015695	57506	MAVS	MSI, GUILD	2
C3241937, C2711227, C0400966	57521	RPTOR	MSI, GUILD	2
C2711227, C0015695	57556	SEMA6A	0	0
C3241937, C0400966	57561	ARRDC3	GUILD	1
C3241937	57591	MRTFA	MSI, GUILD	2
C3241937, C2711227, C0015695	57626	KLHL1	GUILD	1
C3241937, C2711227, C0400966, C4529962	57678	GPAM	MSI	1
C3241937	57685	CACHD1	0	0
C0400966	57692	MAGEE1	0	0
C2711227	57721	METTL14	MSI, GUILD	2
C0400966	57761	TRIB3	GUILD	1
C3241937, C2711227, C0400966, C0015695	57794	SUGP1	GUILD	1
C2711227, C0015695	57805	CCAR2	MSI, GUILD	2
C3241937, C2711227, C0400966, C4529962, C0015695	57817	HAMP	0	0
C0400966	57829	ZP4	0	0
C3241937, C0400966	58484	NLRC4	GUILD	1
C2711227, C0015695	58487	CREBZF	MSI, GUILD	2
C0400966	58986	PGAP6	0	0
C2711227, C0400966, C0015695	59272	ACE2	MSI	1
C3241937, C2711227, C0015695	59307	SIGIRR	MSI	1
C0400966	59341	TRPV4	0	0
C2711227, C0015695	59344	ALOXE3	0	0
C2711227, C0015695	59352	LGR6	0	0
C2711227, C0400966	60343	FAM3A	GUILD	1
C0400966	60485	SAV1	0	0
C2711227	60561	RINT1	GUILD	1
C0400966	60674	GAS5	0	0
C2711227, C0015695	60684	TRAPPC11	0	0
C2711227, C0015695	63924	CIDEC	0	0
C2711227	63976	PRDM16	MSI	1
C3241937	64083	GOLPH3	MSI	1
C2711227, C0015695	64094	SMOC2	0	0
C0400966	64114	TMBIM1	0	0
C2711227, C0400966, C4529962	64127	NOD2	MSI, GUILD	2
C3241937, C2711227, C0015695	64135	IFIH1	GUILD	1
C2711227, C0400966, C4529962, C0015695	64240	ABCG5	GUILD	1
C2711227	64241	ABCG8	0	0
C3241937, C0400966, C4529962	64328	XPO4	GUILD	1
C3241937	64577	ALDH8A1	MSI	1
C0400966	64782	AEN	0	0
C2711227, C0015695	64798	DEPTOR	GUILD	1
C0400966	64801	ARV1	0	0
C2711227, C0400966, C0015695	64806	IL25	0	0
C2711227, C0015695	64834	ELOVL1	0	0
C0400966	64902	AGXT2	MSI, iPath	2
C1850415	65080	MRPL44	MSI	1
C1837256	65082	VPS33A	MSI	1
C2711227, C0015695	65991	FUNDC2	0	0
C2711227, C0400966, C0015695	78986	DUSP26	GUILD	1
C3241937	78996	CYREN	0	0
C2711227, C0015695	79026	AHNAK	GUILD	1
C2711227, C0400966, C4529962, C0015695	79068	FTO	0	0
C3241937, C2711227, C0400966, C0015695	79071	ELOVL6	0	0
C2711227, C0015695	79132	DHX58	GUILD	1
C0400966	79135	APOO	0	0
C3241937, C2711227, C0400966, C4529962, C0015695	79143	MBOAT7	0	0
C2711227, C0015695	79153	GDPD3	0	0
C3241937, C2711227, C0400966, C0015695	79174	CRELD2	0	0
C1850415	79587	CARS2	MONET, MSI	2
C2711227, C0015695	79594	MUL1	GUILD	1
C3241937, C2711227, C0400966, C4529962, C0015695	79602	ADIPOR2	0	0
C2711227, C0015695	79651	RHBDF2	0	0
C3241937, C2711227, C0400966, C0015695	79660	PPP1R3B	0	0
C2711227, C0400966, C0015695	79689	STEAP4	0	0
C2711227, C0015695	79718	TBL1XR1	MONET, MSI, GUILD	3
C2711227, C0400966, C0015695	79734	KCTD17	0	0
C3241937, C2711227, C0400966	79792	GSDMD	0	0
C3241937	79799	UGT2A3	iPath	1
C2711227, C0015695	79809	TTC21B	0	0
C2711227, C0400966, C4529962, C0015695	79811	SLTM	0	0
C3241937, C2711227, C0400966, C4529962, C0015695	79813	EHMT1	MSI, GUILD	2
C3241937	79931	TNIP3	GUILD	1
C2711227, C0400966	79947	DHDDS	0	0
C2711227, C0015695	80149	ZC3H12A	MSI, GUILD	2
C2711227	80168	MOGAT2	0	0
C2711227, C0015695	80207	OPA3	0	0
C2711227, C0400966, C0015695	80218	NAA50	GUILD	1
C2711227	80222	TARS2	GUILD	1
C0400966	80232	WDR26	GUILD	1
C2711227, C0400966, C0015695	80312	TET1	MSI	1
C3241937, C2711227, C0400966, C4529962, C0015695	80339	PNPLA3	MONET, MSI	2
C2711227, C0015695	80347	COASY	GUILD	1
C0400966, C4529962	80763	SPX	0	0
C2711227, C0015695	80781	COL18A1	GUILD	1
C2711227, C0015695	81502	HM13	0	0
C0400966, C4529962	81537	SGPP1	0	0
C4529962	81551	STMN4	0	0
C2711227	81570	CLPB	0	0
C3241937, C0400966, C4529962	81631	MAP1LC3B	MSI, GUILD	2
C0400966	83667	SESN2	GUILD	1
C0400966	83696	TRAPPC9	iPath	1
C3241937, C2711227, C0400966, C4529962, C0015695	83729	INHBE	GUILD	1
C2711227, C0015695	83756	TAS1R3	0	0
C0400966	83854	ANGPTL6	0	0
C0400966	83855	KLF16	0	0
C2711227, C0015695	83989	FAM172A	0	0
C2711227, C0015695	84159	ARID5B	MSI, GUILD	2
C2711227, C0015695	84329	HVCN1	0	0
C2711227	84335	AKT1S1	GUILD	1
C0400966	84447	SYVN1	GUILD	1
C3241937, C0400966	84450	ZNF512	0	0
C2711227, C0015695	84458	LCOR	MSI, GUILD	2
C2711227, C4529962, C0015695	84532	ACSS1	0	0
C2711227, C0400966, C0015695	84557	MAP1LC3A	GUILD	1
C3241937, C2711227, C0400966, C0015695	84649	DGAT2	0	0
C0400966, C4529962	84654	SPZ1	0	0
C3241937, C2711227, C0015695	84668	FAM126A	0	0
C2711227, C0400966, C0015695	84674	CARD6	0	0
C0400966	84693	MCEE	GUILD, iPath	2
C3241937, C2711227, C0400966, C0015695	84699	CREB3L3	GUILD	1
C2711227, C0015695	84706	GPT2	0	0
C0400966	84722	PSRC1	0	0
C3241937, C0400966	84766	CRACR2A	0	0
C2711227	84823	LMNB2	GUILD	1
C3241937	84868	HAVCR2	0	0
C3241937	84870	RSPO3	0	0
C0400966	84876	ORAI1	GUILD	1
C3241937, C0400966	84939	PWWP3A	MSI	1
C2711227	84984	CEP19	0	0
C3241937	85302	FBF1	MSI, GUILD, iPath	3
C4529962	85480	TSLP	GUILD	1
C3241937, C0400966	89780	WNT3A	MSI	1
C2711227	90268	OTULIN	0	0
C2711227, C0015695	90441	ZNF622	0	0
C2711227, C0015695	90665	TBL1Y	0	0
C2711227, C0015695	90865	IL33	0	0
C3241937, C0400966	91351	DDX60L	0	0
C2711227, C0015695	91746	YTHDC1	GUILD	1
C3241937, C2711227, C0400966, C0015695	92086	GGTLC1	0	0
C3241937	92140	MTDH	MSI, GUILD	2
C2711227, C0015695	112476	PRRT2	0	0
C0400966	114112	TXNRD3	0	0
C3241937, C2711227, C0400966, C4529962, C0015695	114548	NLRP3	MSI, GUILD	2
C3241937	114757	CYGB	0	0
C0400966	114884	OSBPL10	0	0
C0400966	114897	C1QTNF1	0	0
C0400966	114899	C1QTNF3	0	0
C2711227, C0015695	114902	C1QTNF5	0	0
C2711227, C0015695	116150	NUS1	0	0
C2711227, C0400966, C0015695	116255	MOGAT1	0	0
C2711227, C0400966, C0015695	116519	APOA5	0	0
C2711227, C0400966, C0015695	116986	AGAP2	0	0
C3241937, C2711227, C0400966, C0015695	117581	TWIST2	0	0
C0400966	120892	LRRK2	MSI, GUILD	2
C3241937	121504	H4-16	MSI, GUILD, iPath	3
C4529962	121549	ASCL4	0	0
C1837256	124454	EARS2	MSI	1
C3241937, C2711227, C0400966, C0015695	124872	B4GALNT2	0	0
C3241937, C2711227, C0400966, C0015695	126129	CPT1C	0	0
C2711227, C0400966, C4529962, C0015695	126282	TNFAIP8L1	GUILD	1
C3241937, C2711227, C0400966, C0015695	127018	LYPLAL1	MONET	1
C3241937, C0400966	129685	TAF8	0	0
C2711227, C0400966, C0015695	130497	OSR1	0	0
C1850415	131118	DNAJC19	MSI	1
C2711227	132320	SCLT1	iPath	1
C3241937, C2711227, C0400966, C0015695	133482	SLCO6A1	0	0
C3241937, C2711227, C0400966, C0015695	133522	PPARGC1B	0	0
C2711227, C0015695	133686	NADK2	0	0
C2711227, C0015695	134391	GPR151	0	0
C0400966	134526	ACOT12	0	0
C3241937, C2711227, C0400966, C0015695	138428	PTRH1	0	0
C3241937, C2711227, C0400966, C4529962	139760	GPR119	0	0
C2711227, C0015695	140576	S100A16	0	0
C3241937, C2711227	140691	TRIM69	0	0
C2711227, C0015695	140823	ROMO1	0	0
C3241937, C2711227, C0015695	143686	SESN3	0	0
C2711227, C0400966	145264	SERPINA12	0	0
C2711227, C0400966, C0015695	145957	NRG4	GUILD	1
C2711227, C0015695	146227	BEAN1	0	0
C2711227	147007	TMEM199	0	0
C0400966	147945	NLRP4	0	0
C3241937, C2711227	148022	TICAM1	GUILD	1
C0400966	148113	CILP2	0	0
C0400966	148738	HJV	0	0
C0400966	150280	HORMAD2	0	0
C2711227, C0015695	152559	PAQR3	0	0
C0400966, C4529962	152831	KLB	0	0
C0400966	153769	SH3RF2	GUILD	1
C3241937, C0400966	154091	SLC2A12	0	0
C2711227	158219	TTC39B	MONET	1
C3241937	160428	ALDH1L2	0	0
C3241937, C2711227, C0400966, C0015695	164656	TMPRSS6	0	0
C2711227, C0015695	165140	OXER1	0	0
C2711227, C0015695	165904	XIRP1	0	0
C3241937, C2711227, C4529962, C0015695	166929	SGMS2	0	0
C3241937	168400	DDX53	MSI	1
C3241937, C2711227, C0400966, C4529962	197259	MLKL	MSI	1
C0400966	197322	ACSF3	MONET	1
C3241937	200931	SLC51A	0	0
C0400966	201232	SLC16A13	0	0
C2711227	203547	VMA21	0	0
C2711227, C0400966, C0015695	221895	JAZF1	GUILD	1
C2711227, C0015695	221955	DAGLB	0	0
C0400966	246778	IL27	0	0
C3241937, C2711227, C0400966, C4529962, C0015695	252995	FNDC5	0	0
C2711227, C0015695	253782	CERS6	0	0
C3241937, C0400966	254102	EHBP1L1	0	0
C3241937, C2711227, C0400966, C4529962, C0015695	255738	PCSK9	MSI	1
C2711227, C0015695	257194	NEGR1	0	0
C3241937	259217	HSPA12A	0	0
C3241937	259230	SGMS1	0	0
C2711227, C0015695	259249	MRGPRX1	0	0
C0400966	266629	SEC14L3	0	0
C3241937, C2711227, C0400966, C0015695	282617	IFNL3	0	0
C2711227, C0400966, C0015695	283120	H19	0	0
C3241937, C2711227, C0400966	283131	NEAT1	0	0
C2711227, C0400966, C0015695	284111	SLC13A5	GUILD	1
C2711227	284119	CAVIN1	GUILD	1
C3241937, C2711227	284217	LAMA1	GUILD	1
C2711227, C0015695	284486	THEM5	0	0
C2711227, C0015695	285148	IAH1	0	0
C2711227	286053	NSMCE2	0	0
C2711227, C0400966, C0015695	286451	YIPF6	0	0
C0400966	338339	CLEC4D	0	0
C2711227, C0015695	339345	NANOS2	0	0
C3241937, C0400966	340061	STING1	GUILD	1
C2711227, C0015695	342096	GOLGA6A	0	0
C3241937, C2711227, C0400966, C4529962, C0015695	345275	HSD17B13	0	0
C2711227, C0400966	345611	IRGM	0	0
C0400966	359948	IRF2BP2	GUILD	1
C2711227, C0400966, C0015695	373156	GSTK1	MSI, GUILD	2
C2711227, C4529962	374569	ASPG	0	0
C2711227, C0015695	375775	PNPLA7	0	0
C3241937, C2711227, C0400966, C0015695	378938	MALAT1	0	0
C2711227, C0015695	387597	ILDR2	0	0
C0400966	388585	HES5	0	0
C2711227, C0400966, C0015695	389941	C1QL3	0	0
C2711227, C0400966, C0015695	404663	LINC01194	0	0
C2711227, C0015695	406884	MIRLET7B	0	0
C2711227, C0015695	406892	MIR100	0	0
C2711227, C0400966	406903	MIR10B	0	0
C3241937, C2711227, C0400966, C4529962, C0015695	406906	MIR122	0	0
C3241937, C2711227, C0400966, C0015695	406921	MIR132	MSI	1
C0400966	406932	MIR140	0	0
C2711227, C0400966, C0015695	406933	MIR141	0	0
C0400966	406935	MIR143	0	0
C3241937, C2711227, C0400966, C0015695	406947	MIR155	MSI	1
C0400966, C4529962	406949	MIR15B	0	0
C2711227, C0400966, C0015695	406952	MIR17	0	0
C2711227, C0400966	406982	MIR20A	0	0
C2711227	406983	MIR200A	0	0
C3241937	406984	MIR200B	0	0
C0400966	406988	MIR205	0	0
C0400966	406989	MIR206	0	0
C3241937, C2711227, C0400966, C4529962, C0015695	406991	MIR21	MSI	1
C0400966	407007	MIR222	0	0
C3241937, C2711227, C0400966	407008	MIR223	0	0
C0400966	407018	MIR27A	0	0
C3241937, C2711227, C0400966, C4529962	407021	MIR29A	MSI	1
C0400966	407024	MIR29B1	0	0
C0400966	407025	MIR29B2	0	0
C3241937, C0400966, C4529962	407026	MIR29C	MSI	1
C3241937, C2711227, C0400966, C0015695	407040	MIR34A	MSI	1
C2711227	407975	MIR17HG	0	0
C2711227, C0015695	440275	EIF2AK4	0	0
C2711227, C0400966, C4529962, C0015695	440503	PLIN5	0	0
C3241937	493829	TRIM72	0	0
C3241937, C0400966, C4529962	493856	CISD2	GUILD	1
C3241937	554313	H4C15	MSI, GUILD	2
C3241937, C2711227, C0400966, C0015695	574411	MIR451A	0	0
C3241937, C2711227	642559	POU5F1P3	0	0
C3241937, C2711227, C0400966, C0015695	728441	GGT2	0	0
C3241937, C2711227, C0400966, C0015695	729230	CCR2	0	0
C0400966	100048912	CDKN2B-AS1	0	0
C0400966	100133941	CD24	0	0
C0400966	100302692	FTX	0	0
C0400966	100507056	CCAT1	0	0
C0400966	100507436	MICA	0	0
C0400966	100616101	ERVK-10	0	0

## Sheet: VPA targets
Compound Name	Inchikey	GeneID(NCBI)	Gene Symbol	Source VPA target	Network method detect the target
VALPROIC ACID	NIJJYAXOARWZEE-UHFFFAOYSA-N	18	ABAT	CHEMBL, CTD	MSI, iPath
VALPROIC ACID	NIJJYAXOARWZEE-UHFFFAOYSA-N	36	ACADSB	CTD, DrugBank	MSI, GUILD, iPath
VALPROIC ACID	NIJJYAXOARWZEE-UHFFFAOYSA-N	207	AKT1	CTD	MONET, MSI, GUILD, iPath
VALPROIC ACID	NIJJYAXOARWZEE-UHFFFAOYSA-N	213	ALB	CTD, DrugBank	MSI, GUILD, iPath
VALPROIC ACID	NIJJYAXOARWZEE-UHFFFAOYSA-N	637	BID	CTD	GUILD, iPath
VALPROIC ACID	NIJJYAXOARWZEE-UHFFFAOYSA-N	836	CASP3	CTD	MSI, GUILD, iPath
VALPROIC ACID	NIJJYAXOARWZEE-UHFFFAOYSA-N	841	CASP8	CTD	MSI, GUILD, iPath
VALPROIC ACID	NIJJYAXOARWZEE-UHFFFAOYSA-N	1544	CYP1A2	CHEMBL, DrugBank	MSI, iPath
VALPROIC ACID	NIJJYAXOARWZEE-UHFFFAOYSA-N	1548	CYP2A6	CHEMBL, CTD, DrugBank	iPath
VALPROIC ACID	NIJJYAXOARWZEE-UHFFFAOYSA-N	1555	CYP2B6	CTD, DrugBank	iPath
VALPROIC ACID	NIJJYAXOARWZEE-UHFFFAOYSA-N	1557	CYP2C19	CHEMBL, DrugBank	iPath
VALPROIC ACID	NIJJYAXOARWZEE-UHFFFAOYSA-N	1559	CYP2C9	CHEMBL, CTD, DrugBank	MONET, MSI, iPath
VALPROIC ACID	NIJJYAXOARWZEE-UHFFFAOYSA-N	1565	CYP2D6	CHEMBL	MSI, iPath
VALPROIC ACID	NIJJYAXOARWZEE-UHFFFAOYSA-N	1576	CYP3A4	CHEMBL, Papyrus, DrugBank	MSI, iPath
VALPROIC ACID	NIJJYAXOARWZEE-UHFFFAOYSA-N	1577	CYP3A5	DrugBank	MONET, iPath
VALPROIC ACID	NIJJYAXOARWZEE-UHFFFAOYSA-N	1588	CYP19A1	CTD	iPath
VALPROIC ACID	NIJJYAXOARWZEE-UHFFFAOYSA-N	2002	ELK1	CTD	MSI, GUILD, iPath
VALPROIC ACID	NIJJYAXOARWZEE-UHFFFAOYSA-N	2099	ESR1	CTD	MSI, GUILD, iPath
VALPROIC ACID	NIJJYAXOARWZEE-UHFFFAOYSA-N	2100	ESR2	CTD	MSI, GUILD, iPath
VALPROIC ACID	NIJJYAXOARWZEE-UHFFFAOYSA-N	2908	NR3C1	CHEMBL	MSI, GUILD, iPath
VALPROIC ACID	NIJJYAXOARWZEE-UHFFFAOYSA-N	3065	HDAC1	CHEMBL, CTD, Papyrus, DrugCentral	MSI, GUILD, iPath
VALPROIC ACID	NIJJYAXOARWZEE-UHFFFAOYSA-N	3066	HDAC2	CHEMBL, CTD, Papyrus, DrugBank, DrugCentral	MSI, GUILD, iPath
VALPROIC ACID	NIJJYAXOARWZEE-UHFFFAOYSA-N	3284	HSD3B2	CTD	iPath
VALPROIC ACID	NIJJYAXOARWZEE-UHFFFAOYSA-N	4363	ABCC1	CTD	iPath
VALPROIC ACID	NIJJYAXOARWZEE-UHFFFAOYSA-N	4780	NFE2L2	CHEMBL	MSI, GUILD, iPath
VALPROIC ACID	NIJJYAXOARWZEE-UHFFFAOYSA-N	4967	OGDH	CTD, DrugBank	MONET, iPath
VALPROIC ACID	NIJJYAXOARWZEE-UHFFFAOYSA-N	5243	ABCB1	CTD	iPath
VALPROIC ACID	NIJJYAXOARWZEE-UHFFFAOYSA-N	5444	PON1	CTD	MSI, iPath
VALPROIC ACID	NIJJYAXOARWZEE-UHFFFAOYSA-N	5465	PPARA	CTD, DrugBank	MONET, MSI, GUILD, iPath
VALPROIC ACID	NIJJYAXOARWZEE-UHFFFAOYSA-N	5467	PPARD	CTD, DrugBank	MONET, MSI, GUILD, iPath
VALPROIC ACID	NIJJYAXOARWZEE-UHFFFAOYSA-N	5468	PPARG	CHEMBL, CTD, DrugBank	MONET, MSI, GUILD, iPath
VALPROIC ACID	NIJJYAXOARWZEE-UHFFFAOYSA-N	5594	MAPK1	CTD	MSI, GUILD, iPath
VALPROIC ACID	NIJJYAXOARWZEE-UHFFFAOYSA-N	5595	MAPK3	CTD	MSI, GUILD, iPath
VALPROIC ACID	NIJJYAXOARWZEE-UHFFFAOYSA-N	5742	PTGS1	DrugBank	iPath
VALPROIC ACID	NIJJYAXOARWZEE-UHFFFAOYSA-N	5999	RGS4	CHEMBL	GUILD, iPath
VALPROIC ACID	NIJJYAXOARWZEE-UHFFFAOYSA-N	6323	SCN1A	CTD, DrugBank	iPath
VALPROIC ACID	NIJJYAXOARWZEE-UHFFFAOYSA-N	6324	SCN1B	CTD, DrugBank	iPath
VALPROIC ACID	NIJJYAXOARWZEE-UHFFFAOYSA-N	6326	SCN2A	CTD, DrugBank	iPath
VALPROIC ACID	NIJJYAXOARWZEE-UHFFFAOYSA-N	6327	SCN2B	CTD, DrugBank	iPath
VALPROIC ACID	NIJJYAXOARWZEE-UHFFFAOYSA-N	6328	SCN3A	CTD, DrugBank	iPath
VALPROIC ACID	NIJJYAXOARWZEE-UHFFFAOYSA-N	6329	SCN4A	CTD, DrugBank	iPath
VALPROIC ACID	NIJJYAXOARWZEE-UHFFFAOYSA-N	6330	SCN4B	CTD, DrugBank	iPath
VALPROIC ACID	NIJJYAXOARWZEE-UHFFFAOYSA-N	6331	SCN5A	CTD, DrugBank	iPath
VALPROIC ACID	NIJJYAXOARWZEE-UHFFFAOYSA-N	6334	SCN8A	CTD, DrugBank	iPath
VALPROIC ACID	NIJJYAXOARWZEE-UHFFFAOYSA-N	6336	SCN10A	CTD, DrugBank	iPath
VALPROIC ACID	NIJJYAXOARWZEE-UHFFFAOYSA-N	6566	SLC16A1	DrugBank	iPath
VALPROIC ACID	NIJJYAXOARWZEE-UHFFFAOYSA-N	6584	SLC22A5	DrugBank	GUILD, iPath
VALPROIC ACID	NIJJYAXOARWZEE-UHFFFAOYSA-N	7068	THRB	CHEMBL	MONET, MSI, GUILD, iPath
VALPROIC ACID	NIJJYAXOARWZEE-UHFFFAOYSA-N	7364	UGT2B7	CHEMBL, CTD, DrugBank	iPath
VALPROIC ACID	NIJJYAXOARWZEE-UHFFFAOYSA-N	7366	UGT2B15	DrugBank	iPath
VALPROIC ACID	NIJJYAXOARWZEE-UHFFFAOYSA-N	7915	ALDH5A1	CHEMBL, CTD, DrugBank	MSI, iPath
VALPROIC ACID	NIJJYAXOARWZEE-UHFFFAOYSA-N	8290	H3-4	CTD	MONET, GUILD, iPath
VALPROIC ACID	NIJJYAXOARWZEE-UHFFFAOYSA-N	8841	HDAC3	CTD	MONET, MSI, GUILD, iPath
VALPROIC ACID	NIJJYAXOARWZEE-UHFFFAOYSA-N	9356	SLC22A6	DrugBank	iPath
VALPROIC ACID	NIJJYAXOARWZEE-UHFFFAOYSA-N	9376	SLC22A8	CHEMBL, DrugBank	iPath
VALPROIC ACID	NIJJYAXOARWZEE-UHFFFAOYSA-N	9495	AKAP5	CTD	iPath
VALPROIC ACID	NIJJYAXOARWZEE-UHFFFAOYSA-N	9734	HDAC9	CTD, DrugBank	MONET, MSI, GUILD, iPath
VALPROIC ACID	NIJJYAXOARWZEE-UHFFFAOYSA-N	10327	AKR1A1	CHEMBL, Papyrus, DrugCentral	MSI, iPath
VALPROIC ACID	NIJJYAXOARWZEE-UHFFFAOYSA-N	11309	SLCO2B1	DrugBank	iPath
VALPROIC ACID	NIJJYAXOARWZEE-UHFFFAOYSA-N	54575	UGT1A10	DrugBank	iPath
VALPROIC ACID	NIJJYAXOARWZEE-UHFFFAOYSA-N	54576	UGT1A8	CHEMBL, DrugBank	iPath
VALPROIC ACID	NIJJYAXOARWZEE-UHFFFAOYSA-N	54578	UGT1A6	CTD, DrugBank	iPath
VALPROIC ACID	NIJJYAXOARWZEE-UHFFFAOYSA-N	54600	UGT1A9	DrugBank	iPath
VALPROIC ACID	NIJJYAXOARWZEE-UHFFFAOYSA-N	54657	UGT1A4	DrugBank	iPath
VALPROIC ACID	NIJJYAXOARWZEE-UHFFFAOYSA-N	54658	UGT1A1	DrugBank	iPath
VALPROIC ACID	NIJJYAXOARWZEE-UHFFFAOYSA-N	54659	UGT1A3	CHEMBL
VALPROIC ACID	NIJJYAXOARWZEE-UHFFFAOYSA-N	55775	TDP1	Papyrus	iPath
VALPROIC ACID	NIJJYAXOARWZEE-UHFFFAOYSA-N	55800	SCN3B	CTD, DrugBank	iPath
VALPROIC ACID	NIJJYAXOARWZEE-UHFFFAOYSA-N	64321	SOX17	CTD	iPath
VALPROIC ACID	NIJJYAXOARWZEE-UHFFFAOYSA-N	121504	H4-16	CTD	MSI, GUILD, iPath

## Sheet: AOP WIKI Genes
GeneID(NCBI)	Gene Symbol	AOPWiki_ID	Network method detect the target
31	ACACA	Aop:58	GUILD
196	AHR	Aop:57	MSI, GUILD
208	AKT2	Aop:62	MSI, GUILD
338	APOB	Aop:61	MSI, GUILD
948	CD36	Aop:57	MSI, GUILD
1374	CPT1A	Aop:60	0
1543	CYP1A1	Aop:57	MSI
2194	FASN	Aop:34	MSI, GUILD
2908	NR3C1	Aop:318	MSI, GUILD, iPath
3028	HSD17B10	Aop:36	MSI, GUILD
3158	HMGCS2	Aop:60	MSI
3170	FOXA2	Aop:60	MSI
3172	HNF4A	Aop:59	MONET, MSI, GUILD
3295	HSD17B4	Aop:232	MSI, GUILD
3949	LDLR	Aop:57	MSI, GUILD
4547	MTTP	Aop:61	0
4778	NFE2	Aop:232	0
4780	NFE2L2	Aop:61	MSI, GUILD, iPath
5105	PCK1	Aop:57	MSI, GUILD
5465	PPARA	Aop:232	MONET, MSI, GUILD, iPath
5467	PPARD	Aop:36	MONET, MSI, GUILD, iPath
5468	PPARG	Aop:34	MONET, MSI, GUILD, iPath
5777	PTPN6	Aop:232	MSI, GUILD
6319	SCD	Aop:57	GUILD
6720	SREBF1	Aop:62	MSI, GUILD
7376	NR1H2	Aop:34	MONET
8431	NR0B2	Aop:61	MONET, MSI, GUILD
8856	NR1I2	Aop:60	MONET, MSI, GUILD
9970	NR1I3	Aop:58	MONET
9971	NR1H4	Aop:232	MONET, MSI, GUILD
10062	NR1H3	Aop:34	MONET, MSI, GUILD
51085	MLXIPL	Aop:34	MSI, GUILD
51171	HSD17B14	Aop:61	0
